# Supplementary material for: Pediatric primary care in Ontario and Manitoba after the onset of the COVID-19 pandemic: a population-based study
Source: PubMed Central journal article supplement — CMAJ Open. 2021 Dec 14;9(4):E1149–58. doi: 10.9778/cmajo.20210161 (PMC8687490; doi:10.9778/cmajo.20210161), 2021-12-14
Supplement: open-2021-0161-1-at.pdf [file open-2021-0161-1-at.pdf]

## Appendix 1. Supplementary material

**Table S1. Data sources and associated study variables**

| <b>Data source</b>                                                         | <b>Variables</b>                                    | <b>Province</b>   |
|----------------------------------------------------------------------------|-----------------------------------------------------|-------------------|
| Ontario Health Insurance Plan (OHIP)                                       | Primary care visits                                 | Ontario           |
| Registered Person Database (RPDB)                                          | Patient sex, residential postal code, date of birth | Ontario           |
| Immigration, Refugees and Citizenship Canada's Permanent Resident Database | Immigration status                                  | Ontario, Manitoba |
| Manitoba Health Insurance Registry                                         | Patient sex, residential postal code, date of birth | Manitoba          |
| Manitoba Medical Services                                                  | Primary care visits                                 | Manitoba          |
| Ontario Marginalization Index                                              | Material deprivation quintile                       | Ontario           |
| Canadian Marginalization Index                                             | Material deprivation quintile                       | Manitoba          |
| 2016 Canadian Census                                                       | Rurality                                            | Ontario, Manitoba |

**Table S2.** List of primary care fee codes from Ontario and Manitoba.

ONTARIO

| Fee code (OHIP)          | Description                                                                                                           |
|--------------------------|-----------------------------------------------------------------------------------------------------------------------|
| <b>WELL CHILD VISITS</b> |                                                                                                                       |
| K017                     | ANNUAL HEALTH EXAM-CHILD AFT. 2ND BIRTHDAY.                                                                           |
| K130                     | PERIODIC HEALTH VISIT-ADOLESCENT (AGE 16 & 17)                                                                        |
| K267                     | ANNUAL HEALTH EXAM-CHILD-AFT. 2ND BIRTHDAY PAED.                                                                      |
| K269                     | ANNUAL HEALTH EXAM-PAEDIATRICS-ADOLESCENT-OFFICE                                                                      |
| A002                     | 18 MONTH WELL BABY CHECK -GP/FP                                                                                       |
| A268                     | 18 MONTH WELL BABY CHECK - PAEDS                                                                                      |
| A007                     | INTERMED.ASSESS/WELL BABY CARE-F.P./G.P./PAED. With diagnostic code 916 or 917                                        |
| A262                     | LEVEL 2 PEDIATRIC ASSESSMENT with diagnostic code 916 or 917                                                          |
| <b>IMMUNIZATIONS</b>     |                                                                                                                       |
| G372                     | D./T. PROC.-INJECTIONS-INTRADERMAL/MUSCULAR ETC. EA. ADD.                                                             |
| G373                     | D./T. PROC.-INJ. INTRADERMAL/MUSC. BASIC FEE (SHICK TEST)                                                             |
| G538                     | D&T IMMUNIZATION-WITH VISIT, EACH INJECT.                                                                             |
| G539                     | D&T IMMUNIZATION-SOLE REASON,FIRST INJECTION                                                                          |
| G590                     | INFLUENZA AGENT +VISIT                                                                                                |
| G591                     | INFLUENZA AGENT SOLE REASON                                                                                           |
| G840                     | DTaPIPv-Diphtheria, Tetanus, acellular Pertussis, Inactivated Polio Virus paediatric                                  |
| G841                     | DTaPIPVHib-Diphtheria, Tetanus, acellular Pertussis, Inactivated Polio Virus, Haemophilus influenza type b paediatric |
| G844                     | MenCC-Meningococcal C Conjugate                                                                                       |
| G845                     | MMR-Measles, Mumps, Rubella                                                                                           |
| G846                     | Pneu - Pneumococcal Conjugate                                                                                         |
| G848                     | Var-Varicella                                                                                                         |
| <b>SICK VISITS</b>       |                                                                                                                       |
| A003                     | GEN. ASSESS. -F.P./G.P.                                                                                               |
| A004                     | GEN.RE-ASSESS-F.P./G.P.                                                                                               |
| A007                     | INTERMED.ASSESS/WELL BABY CARE-F.P./G.P./PAED.                                                                        |
| A261                     | MINOR ASSESS.-PAED.                                                                                                   |
| A262                     | LEVEL 2 PEDIATRIC ASSESSMENT                                                                                          |
| A263                     | MEDICAL SPECIFIC ASSESSMENT-PAED                                                                                      |
| A264                     | MEDICAL SPECIFIC RE-ASSESSMENT-PAED                                                                                   |
| A661                     | COMPLEX MEDICAL SPECIFIC RE-ASSESSMENT                                                                                |
| A901                     | GENERAL/FAMILY PRACTICE-HOUSECALL ASSESSMENT                                                                          |
| A903                     | GEN/FAM PRACT-PRE-DENTAL/OPER.ASSESS LIMIT 2 PER YEAR/PT                                                              |
| A990                     | SPEC VIS PHYS OFFICE - WK/DAYTIME                                                                                     |
| A994                     | SPEC VIS PHYS OFFICE - MON-FRI., EVE                                                                                  |
| A996                     | SPEC VIS PHYS OFFICE - NIGHTS                                                                                         |
| B910                     | SPEC.VISIT,7.00AM-12.00M.NMON-FRI.1ST PT SEEN OFF/HOSP/EMERG                                                          |
| B914                     | SPEC.VISIT,7.00AM-12.00MN,SAT,SUN&HOL.1ST PT EXC.OFF/EMERG/H                                                          |
| B990                     | SPEC VIS TO PT'S HOME, WK/DAYTIME                                                                                     |
| B992                     | SPEC VIS-PT'S HOME/NON-ELECT -SAC OFF HRS. WK/DAYTIME                                                                 |
| B994                     | SPEC VIS TO PT'S HOME/NON-ELECT., EVE                                                                                 |
| B996                     | SPECIAL VISIT-HOME-NIGHTS(12MN-7AM) 1ST PT.                                                                           |
| G212                     | D./T. PROC.-ALLERGY-HYPOSENSITIZATION INJECTION PLUS BASIC                                                            |
| G271                     | D./T. PROC.-CARDIOV.-ANTICOAGULANT SUPERVISION                                                                        |
| G365                     | D./T. PROC.-GYNAECOLOGY-PAPANICOLAOU SMEAR                                                                            |
| K002                     | INTERVIEWS-RELATIVES ON BEHALF OF PATIENT PER 1/2 HOUR                                                                |
| K003                     | INTERVIEW ON BEHALF OF PATIENT (CAS,LEG.GUARD) PER 1/2HR.                                                             |
| K005                     | INDIVIDUAL CARE PER 1/2 HR                                                                                            |
| K007                     | IND. PSYCHOTHERAPY PER HALF HOUR - GP                                                                                 |

Appendix 1, as supplied by the authors. Appendix to: Saunders N, Guttman A, Brownell M, et al. Pediatric primary care in Ontario and Manitoba after the onset of the COVID-19 pandemic: a population-based study. *CMAJ Open* 2021. DOI:10.9778/cmajo.20210161. Copyright © 2021 The Author(s) or their employer(s). To receive this resource in an accessible format, please contact us at [cmajgroup.cmajca](mailto:cmajgroup.cmajca).

|             |                                                              |
|-------------|--------------------------------------------------------------|
| <b>K008</b> | DIAG.INTERVIEW W/CHILD &/OR PARENT-PER 1/2HR.                |
| <b>K013</b> | COUNSELLING-ONE OR MORE PEOPLE-PER 1/2HR.                    |
| <b>K014</b> | COUNSELLING-FOR DONOR/RECIP/RECIP FAMILIES RE;ORGAN TRANSPLA |
| <b>K016</b> | GENETIC ASSESSMENT PATIENT OR FAMILY, DIRECT CONTACT, PER    |
| <b>K022</b> | HIV PRIM CARE INDIVID CARE 1/2 HR OR MAJOR PART              |
| <b>K033</b> | COUNSELLING - 1 PT/YR/UNIT                                   |
| <b>K040</b> | GROUP COUNSEL - 2 +PTS WITH NO K013/K040X3                   |
| <b>P004</b> | OBS.-PRENATAL CARE-MINOR PRENATAL ASSESS.-SUBSEQ.PRENAT.VIS. |
| <b>Q990</b> | SPEC VIS - OTHER SETTINGS - WK/DAYTIME                       |
| <b>Q992</b> | SPEC VIS - OTHER SETTINGS-SAC.OFF.HRS.WK/DAYTIME, ADDIT'L PT |
| <b>Q994</b> | SPEC VIS - OTHER SETTINGS, MON-FRI., EVE                     |
| <b>Q996</b> | SPEC VIS - OTHER SETTING - NIGHTS                            |

Virtual visits were defined as those with either a location code indicating a virtual visit or that included any of the following virtual supplemental codes that were accompanied by an a primary care fee or diagnosis code: B099, B100, B200, B101, B201, B102, B202, B103, B203, B209, K080, K081, K083

### Primary care ambulatory visits for Manitoba

This method includes a number of "data conditions" that will either include or exclude specific types of services.

1. Include only those records with the tariff prefix, PREFIX = "7". These are defined as "Visits, Calls and Special Tests" in the Medical Services data.
2. Exclude a visit if it happens during an inpatient hospital stay, identified using the hospital abstracts data and ADT data. A visit on the day of admission or discharge, or in between these two dates is excluded.
3. Exclude Emergency Room services using the variable OPD with the following value: "E" - Emergency Room Services.
4. Exclude nonprimary care visits by keeping visits with mdblocs ('02', '11', '111', '112', '114', '115', '116', '200')  
'02'='02. PAEDIATRICS'  
'11'='11. GENERAL PRACTICE'  
'111'='111. GENERAL PRACTICE - URBAN'  
'112'='112. GENERAL PRACTICE - RURAL'  
'114'='114. COMMUNITY MEDICINE (PUBLIC HEALTH)'  
'115'='115. FAMILY PRACTICE - URBAN'  
'116'='116. FAMILY PRACTICE - RURAL'  
'200'='200. PRIMARY CARE NURSE'

### **WELL CHILD VISITS**

| ICD-9       |                                                                                             |
|-------------|---------------------------------------------------------------------------------------------|
| Code        | Description                                                                                 |
| <b>V202</b> | ROUTINE CHILD HEALTH EXAM                                                                   |
| <b>V700</b> | ROUTINE GENERAL MEDICAL EXAMINATION                                                         |
| Tariff      | Tariff Label                                                                                |
| <b>8601</b> | IMMUNIZATIONS-DPT, PERTUSSIS VAC AND TET TOX (COMB) (40 LF OF DPT),-1ST DOSE (INIT SERIES)  |
| <b>8602</b> | IMMUNIZATIONS-DPT, PERTUSSIS VAC AND TET TOX (COMB) (40 LF OF DPT),-2ND DOSE (INIT SERIES)  |
| <b>8603</b> | IMMUNIZATIONS-DPT, PERTUSSIS VAC AND TET TOX (COMB) (40 LF OF DPT),-3RD DOSE (INIT SERIES)  |
| <b>8609</b> | IMMUNIZATIONS-DPT, PERTUSSIS VAC AND TET TOX (COMB) (40 LF OF DPT),-REINFORCING DOSES       |
| <b>8611</b> | IMMUNIZATIONS-OVP, LIVE, ORAL (SABIN) (TRIVALENT),-1ST DOSE (INITIAL SERIES)                |
| <b>8612</b> | IMMUNIZATIONS-OVP, LIVE, ORAL (SABIN) (TRIVALENT),-2ND DOSE (INITIAL SERIES)                |
| <b>8613</b> | IMMUNIZATIONS-OVP, LIVE, ORAL (SABIN) (TRIVALENT),-3RD DOSE (INITIAL SERIES)                |
| <b>8619</b> | IMMUNIZATIONS-OVP, LIVE, ORAL (SABIN) (TRIVALENT),-REINFORCING DOSES                        |
| <b>8621</b> | IMMUNIZATIONS-MEASLES (RUBEOLA)-VIRUS VAC LIVE ATTENUATED, 1ST DOSE                         |
| <b>8641</b> | IMMUNIZATIONS-DT-DIPHTHERIA TOX AND TET TOX (COMB) (50 LF OF DT TOX)-1ST DOSE (INIT SERIES) |
| <b>8642</b> | IMMUNIZATIONS-DT-DIPHTHERIA TOX AND TET TOX (COMB) (50 LF OF DT TOX)-2ND DOSE (INIT SERIES) |
| <b>8643</b> | IMMUNIZATIONS-DT-DIPHTHERIA TOX AND TET TOX (COMB) (50 LF OF DT TOX)-3RD DOSE (INIT SERIES) |

Appendix 1, as supplied by the authors. Appendix to: Saunders N, Guttman A, Brownell M, et al. Pediatric primary care in Ontario and Manitoba after the onset of the COVID-19 pandemic: a population-based study. *CMAJ Open* 2021. DOI:10.9778/cmajo.20210161. Copyright © 2021 The Author(s) or their employer(s). To receive this resource in an accessible format, please contact us at [cmajgroup.cmajca](mailto:cmajgroup.cmajca).

**8649** IMMUNIZATIONS-DT-DIPHTHERIA TOX AND TET TOX (COMB) (50 LF OF DT TOX)-REINFORCING DOSE  
**8651** IMMUNIZATIONS-DT-DIPHTHERIA TOX AND TET TOX (COMB) (10 LF OF DT TOX)-1ST DOSE (INIT SERIES)  
**8670** IMMUNIZATIONS - MMR, MEASLES, MUMPS, RUBELLA COMBINED VACCINE, SINGLE DOSE  
**8671** IMMUNIZATIONS - MMRV MEASLES-MUMPS-RUBELLA-VARICELLA, SINGLE DOSE  
**8672** IMMUNIZATIONS - VZIG - VARICELLA ZOSTER IMMUNE GLOBULIN  
**8674** IMMUNIZATIONS CHICKEN POX VACCINE  
**8681** IMMUNIZATIONS PNEUMOCOCCAL CONJUGATE VACCINE 1ST DOSE  
**8682** IMMUNIZATIONS PNEUMOCOCCAL CONJUGATE VACCINE 2ND DOSE  
**8683** IMMUNIZATIONS PNEUMOCOCCAL CONJUGATE VACCINE 3RD DOSE  
**8684** IMMUNIZATIONS PNEUMOCOCCAL CONJUGATE VACCINE 4TH DOSE  
**8685** IMMUNIZATIONS MENINGOCOCCAL CONJUGATE VACCINE 1ST DOSE  
**8686** IMMUNIZATIONS MENINGOCOCCAL CONJUGATE VACCINE 2ND DOSE  
**8687** IMMUNIZATIONS MENINGOCOCCAL CONJUGATE VACCINE 3RD DOSE  
**8778** IMMUNIZATIONS - ROTA-5 (ROTAVIRUS PENTAVALENT)  
**8781** IMMUNIZATIONS - DPT + PRP-T (ACTIVE - HIB), CONNAUGHT LABORATORY) INITIAL SERIES 1ST DOSE  
**8782** IMMUNIZATIONS - DPT + PRP-T (ACTIVE - HIB), CONNAUGHT LABORATORY) INITIAL SERIES 2ND DOSE  
**8783** IMMUNIZATIONS - DPT + PRP-T (ACTIVE - HIB), CONNAUGHT LABORATORY) INITIAL SERIES 3RD DOSE  
**8789** IMMUNIZATIONS - DPT + PRP-T (ACTIVE - HIB), CONNAUGHT LAB) INITIAL SERIES REINFORCING DOSE  
**8791** IMMUNIZATIONS-INFLUENZA VACCINE-1ST DOSE (INITIAL SERIES)  
**8798** IMMUNIZATIONS DTP DIPHTHERIA TETANUS INACTIVATED POLIO  
**8802** IMMUNIZATIONS DAPTP/HIB - DIPHTHERIA,ACELLAR PERTUSSIS TETANUS INAC POLIO HAEM INFLUENZA B  
**8804** IMMUNIZ DAPTP/HIB-DIPHTHERIA,ACELL PERTUSSIS TETANUS INAC POLIO HAEM INFLUENZA B 4 MONTHS  
**8805** IMMUNIZATIONS TDP-TETANUS DIPHTHERIA ANDINACTIVATED POLIO PERSONS>7  
**8806** IMMUNIZ DAPTHP/HIB-DIPHTHERIA,ACELL PERTTETANUS INAC POLIO HAEN INFLUENZA B 6 MONTHS  
**8807** IMMUNIZ DAPTP/HIB-DIPHTHERIA,ACELL PERTUTETANUS INAC POLIO HAEN INFLUENZA B 18 MONS  
**8896** IMMUNIZATIONS-PNEUMOCOCCAL CONJUGATE VACCINE  
**8901** IMMUNIZATIONS-HAEMOPHILUS INFLUENZA B,- 1ST DOSE (INITIAL SERIES)  
**8902** IMMUNIZATIONS-HAEMOPHILUS INFLUENZA B,- 2ND DOSE (INITIAL SERIES)  
**8903** IMMUNIZATIONS-HAEMOPHILUS INFLUENZA B,- 3RD DOSE (INITIAL SERIES)  
**8907** IMMUNIZATIONS - TETANUS, DIPHTHERIA, ACELLULARPERTUSSIS (TDAP)  
**8909** IMMUNIZATIONS-HAEMOPHILUS INFLUENZA B,- REINFORCING DOSES  
**8913** IMMUNIZATIONS - HBV HEPATITIS B VAC 3RD DOSE (INITIAL SERIES)  
**8921** IMMUNIZATIONS - DPTP DIPHTHERIA, PERTUSSIS TETANUS AND POLIO - 1ST DOSE INITIAL SERIES  
**8922** IMMUNIZATIONS - DPTP DIPHTHERIA, PERTUSSIS, TETANUS AND POLIO - 2ND DOSE INITIAL SERIES  
**8923** IMMUNIZATIONS - DPTP DIPHTHERIA, PERTUSSIS, TETANUS AND POLIO - 3RD DOSE INITIAL SERIES  
**8924** IMMUNIZATIONS DAPTP- DIPHTHERIA,ACELLAR PERTUSSIS TETANUS AND INACTIVATED POLIO  
**8929** IMMUNIZATIONS - DPTP DIPHTHERIA, PERTUSSIS, TETANUS AND POLIO - REINFORCING DOSES  
**8931** IMMUNIZATIONS - IVP POLIO (SALK) 1ST DOSE INITIAL SERIES  
**8932** IMMUNIZATIONS - IVP POLIO (SALK) 2ND DOSE INITIAL SERIES  
**8933** IMMUNIZATIONS - IVP POLIO (SALK) 3RD DOSE INITIAL SERIES  
**8939** IMMUNIZATIONS - IVP POLIO (SALK) REINFORCING DOSES  
**8964** IMMUNIZATIONS - TDAP-IPV TET-DIPHTH-APTERTISSIS, SINGLE DOSE  
**8971** IMMUNIZATIONS-HPV-9-HUMAN PAPILOMAVIRUS 6,11,16,18,31,33,45,52,58-SINGLE DOSE  
**8990** IMMUNIZATIONS-MEN-C-ACWY-135 MENINGOCOCCAL CONJUGATE ACWY, SINGLE DOSE  
**8990** IMMUNIZATIONS-MEN-C-ACWY-135 MENINGOCOCCAL CONJUGATE ACWY, SINGLE DOSE

| Tariff      | VIRTUAL VISITS                                                                                   |
|-------------|--------------------------------------------------------------------------------------------------|
| <b>8321</b> | VIRTUAL VISIT BY TELEPHONE OR VIDEO                                                              |
| <b>8533</b> | VIRTUAL PSYCHOTHERAPY BY TELEPHONE OR VIDEO                                                      |
| <b>8527</b> | CHRONIC CARE VIRTUAL VISIT BY TELEPHONE OR VIDEO                                                 |
| <b>8538</b> | HOSPITAL CARE, SUBSEQUENT CARE, 22ND THRU 25TH WEEK, PER VISIT, ACTIVE REHABILITATION CARE       |
| <b>8521</b> | VIRTUAL CONSULTATION BY TELEPHONE OR VIDEO, INVOLVING CHILD OR GERIATRIC PATIENT BY PSYCHIATRIST |
| <b>8786</b> | VIRTUAL PSYCHIATRIC CARE BY TELEPHONE OR VIDEO                                                   |
| <b>8655</b> | VIRTUAL PSYCHOTHERAPY BY TELEPHONE OR VIDEO BY NON-PSYCHIATRIST                                  |

**Table S3. Inclusions and exclusions of study population by province and by year, children 29 days to 17 years, inclusive.**

| <b>Inclusion/Exclusion</b>                                                                                                                | <b>2017</b> | <b>2018</b> | <b>2019</b> | <b>2020</b> |
|-------------------------------------------------------------------------------------------------------------------------------------------|-------------|-------------|-------------|-------------|
| <b>ONTARIO</b>                                                                                                                            |             |             |             |             |
| Ontario valid sex and age 29 days to 17 years at index, (January 1 of each year). New immigrants after index + 90 days also not included. | 2919123     | 2928579     | 2946507     | 2969047     |
| Not OHIP eligible at index +/-90 days                                                                                                     | 113850      | 107078      | 100882      | 93894       |
| Non-Ontario residents at index (January 1 of each year)                                                                                   | 43971       | 44803       | 45218       | 45981       |
| Included                                                                                                                                  | 2761302     | 2776698     | 2800407     | 2829172     |
|                                                                                                                                           |             |             |             |             |
| <b>MANITOBA</b>                                                                                                                           |             |             |             |             |
| All Manitoba children aged 29 days to 17 years inclusive, with Manitoba coverage on Jan 1 each year (+/- 90days)                          | 306937      | 310151      | 311261      | 313560      |
| Non-Manitoba residents at index                                                                                                           | 124         | 40          | 49          | 165         |
| Included                                                                                                                                  | 306813      | 310111      | 311212      | 313395      |

**Table S4. Observed, expected and adjusted relative change (RR, 95% CI) in primary care (overall, virtual, in-person), well-child, and sick visits in Ontario and Manitoba during the post-pandemic era. All rates are weekly visit rates per 1000 population and do not include newborns.**

|                                                  | Ontario       |               |                   | Manitoba      |               |                   |
|--------------------------------------------------|---------------|---------------|-------------------|---------------|---------------|-------------------|
|                                                  | Observed rate | Expected rate | RR (95% CI)       | Observed rate | Expected rate | RR (95% CI)       |
| <b>All primary care visits</b>                   |               |               |                   |               |               |                   |
| Overall                                          | 39.5          | 49.5          | 0.80 (0.77, 0.82) | 39.0          | 47.7          | 0.82 (0.79, 0.84) |
| March                                            | 38.4          | 51.9          | 0.74 (0.73, 0.74) | 41.0          | 50.1          | 0.82 (0.80, 0.83) |
| April                                            | 29.6          | 50.8          | 0.58 (0.58, 0.59) | 28.6          | 49.2          | 0.58 (0.56, 0.60) |
| May                                              | 32.8          | 49.0          | 0.67 (0.66, 0.68) | 33.0          | 47.6          | 0.69 (0.67, 0.71) |
| June                                             | 34.3          | 46.4          | 0.74 (0.72, 0.75) | 35.2          | 44.9          | 0.78 (0.77, 0.80) |
| July                                             | 37.7          | 44.0          | 0.86 (0.84, 0.88) | 39.1          | 41.7          | 0.94 (0.92, 0.96) |
| August                                           | 38.9          | 44.6          | 0.87 (0.83, 0.92) | 39.6          | 43.0          | 0.92 (0.88, 0.96) |
| September                                        | 43.1          | 46.8          | 0.92 (0.90, 0.95) | 40.2          | 46.9          | 0.86 (0.82, 0.89) |
| October                                          | 50.0          | 51.5          | 0.97 (0.95, 0.99) | 46.0          | 50.6          | 0.91 (0.89, 0.93) |
| November                                         | 52.8          | 60.5          | 0.87 (0.84, 0.91) | 49.2          | 54.4          | 0.90 (0.88, 0.93) |
| <b>Well-child visits</b>                         |               |               |                   |               |               |                   |
| Overall                                          | 8.9           | 12.2          | 0.73 (0.66, 0.80) | 10.4          | 11.2          | 0.93 (0.87, 1.00) |
| March                                            | 6.2           | 11.8          | 0.52 (0.49, 0.56) | 6.7           | 10.2          | 0.66 (0.64, 0.68) |
| April                                            | 4.4           | 10.9          | 0.41 (0.38, 0.44) | 5.5           | 9.8           | 0.57 (0.55, 0.58) |
| May                                              | 5.4           | 10.5          | 0.52 (0.46, 0.58) | 7.3           | 9.6           | 0.76 (0.74, 0.78) |
| June                                             | 5.9           | 10.5          | 0.56 (0.51, 0.61) | 8.2           | 9.7           | 0.84 (0.81, 0.87) |
| July                                             | 6.9           | 11.7          | 0.59 (0.57, 0.61) | 9.0           | 9.8           | 0.91 (0.88, 0.94) |
| August                                           | 8.0           | 12.9          | 0.62 (0.58, 0.66) | 9.8           | 11.4          | 0.86 (0.80, 0.93) |
| September                                        | 7.6           | 10.6          | 0.71 (0.63, 0.81) | 9.1           | 10.6          | 0.86 (0.84, 0.88) |
| October                                          | 16.9          | 13.4          | 1.26 (1.19, 1.34) | 17.5          | 14.3          | 1.22 (1.08, 1.38) |
| November                                         | 20.5          | 17.2          | 1.19 (1.04, 1.37) | 22.5          | 15.8          | 1.42 (1.23, 1.64) |
| <b>Well-child visits (with immunizations)</b>    |               |               |                   |               |               |                   |
| Overall                                          | 7.8           | 9.3           | 0.83 (0.73, 0.95) | 6.5           | 6.5           | 1.00 (0.85, 1.17) |
| March                                            | 4.9           | 8.7           | 0.56 (0.54, 0.59) | 3.4           | 4.9           | 0.69 (0.59, 0.81) |
| April                                            | 4.0           | 7.5           | 0.53 (0.49, 0.59) | 2.8           | 4.6           | 0.61 (0.54, 0.68) |
| May                                              | 4.8           | 7.1           | 0.68 (0.58, 0.79) | 3.6           | 4.4           | 0.80 (0.69, 0.93) |
| June                                             | 5.0           | 6.9           | 0.72 (0.61, 0.84) | 3.7           | 4.8           | 0.78 (0.66, 0.92) |
| July                                             | 5.7           | 7.1           | 0.80 (0.69, 0.92) | 4.2           | 4.7           | 0.88 (0.73, 1.07) |
| August                                           | 6.4           | 8.2           | 0.78 (0.73, 0.84) | 4.5           | 5.4           | 0.83 (0.75, 0.92) |
| September                                        | 6.1           | 7.5           | 0.82 (0.71, 0.95) | 4.8           | 5.3           | 0.90 (0.79, 1.03) |
| October                                          | 15.7          | 11.8          | 1.33 (1.19, 1.49) | 14.3          | 11.1          | 1.29 (1.05, 1.58) |
| November                                         | 19.3          | 18.3          | 1.06 (0.86, 1.31) | 19.4          | 12.9          | 1.50 (1.25, 1.81) |
| <b>Well-child visits (without immunizations)</b> |               |               |                   |               |               |                   |
| Overall                                          | 1.1           | 2.8           | 0.39 (0.36, 0.42) | 3.9           | 4.7           | 0.83 (0.73, 0.94) |
| March                                            | 1.3           | 3.0           | 0.43 (0.42, 0.45) | 3.4           | 5.1           | 0.66 (0.61, 0.73) |
| April                                            | 0.4           | 2.7           | 0.15 (0.15, 0.16) | 2.8           | 4.9           | 0.56 (0.52, 0.61) |
| May                                              | 0.6           | 2.6           | 0.24 (0.22, 0.26) | 3.7           | 4.9           | 0.76 (0.70, 0.84) |
| June                                             | 0.9           | 2.8           | 0.32 (0.31, 0.34) | 4.4           | 4.8           | 0.92 (0.83, 1.03) |
| July                                             | 1.2           | 3.2           | 0.38 (0.35, 0.41) | 4.8           | 4.9           | 0.99 (0.85, 1.15) |
| August                                           | 1.6           | 3.8           | 0.41 (0.35, 0.48) | 5.3           | 5.8           | 0.92 (0.75, 1.13) |
| September                                        | 1.5           | 3.0           | 0.48 (0.47, 0.50) | 4.3           | 5.1           | 0.85 (0.75, 0.96) |
| October                                          | 1.2           | 2.7           | 0.44 (0.43, 0.45) | 3.2           | 4.2           | 0.75 (0.68, 0.82) |
| November                                         | 1.2           | 2.6           | 0.45 (0.44, 0.47) | 3.1           | 4.0           | 0.77 (0.70, 0.86) |
| <b>Sick visits</b>                               |               |               |                   |               |               |                   |
| Overall                                          | 30.6          | 37.4          | 0.82 (0.78, 0.85) | 28.6          | 36.5          | 0.78 (0.75, 0.81) |
| March                                            | 32.2          | 40.3          | 0.80 (0.79, 0.81) | 34.3          | 40.0          | 0.86 (0.85, 0.87) |
| April                                            | 25.1          | 40.4          | 0.62 (0.61, 0.64) | 23.0          | 39.5          | 0.58 (0.56, 0.61) |
| May                                              | 27.3          | 39.2          | 0.70 (0.67, 0.72) | 25.7          | 38.0          | 0.68 (0.65, 0.70) |
| June                                             | 28.4          | 36.7          | 0.77 (0.75, 0.81) | 27.0          | 35.2          | 0.77 (0.74, 0.79) |
| July                                             | 30.9          | 34.0          | 0.91 (0.87, 0.95) | 30.2          | 31.9          | 0.94 (0.92, 0.97) |
| August                                           | 30.9          | 33.0          | 0.93 (0.86, 1.01) | 29.8          | 31.7          | 0.94 (0.89, 1.00) |
| September                                        | 35.5          | 35.7          | 1.00 (0.95, 1.04) | 31.1          | 36.3          | 0.86 (0.81, 0.91) |
| October                                          | 33.1          | 37.1          | 0.89 (0.87, 0.92) | 28.5          | 36.3          | 0.79 (0.76, 0.81) |
| November                                         | 32.3          | 40.7          | 0.79 (0.77, 0.82) | 26.7          | 38.4          | 0.69 (0.68, 0.71) |

Appendix 1, as supplied by the authors. Appendix to: Saunders N, Guttman A, Brownell M, et al. Pediatric primary care in Ontario and Manitoba after the onset of the COVID-19 pandemic: a population-based study. *CMAJ Open* 2021. DOI:10.9778/cmaj.20210161. Copyright © 2021 The Author(s) or their employer(s). To receive this resource in an accessible format, please contact us at [cmajgroup.cmajca](mailto:cmajgroup.cmajca).

| <b>Virtual primary care visits</b> | <b>Observed</b> |  | <b>% virtual visits</b> | <b>Observed</b> |  | <b>% virtual visits</b> |
|------------------------------------|-----------------|--|-------------------------|-----------------|--|-------------------------|
| Overall                            | 20.8            |  | 52.8%                   | 11.4            |  | 29.3%                   |
| March                              | 12.5            |  | 32.5%                   | 9.0             |  | 22.1%                   |
| April                              | 22.3            |  | 75.5%                   | 15.1            |  | 52.8%                   |
| May                                | 22.9            |  | 70.0%                   | 13.4            |  | 40.7%                   |
| June                               | 21.4            |  | 62.5%                   | 10.2            |  | 29.1%                   |
| July                               | 21.3            |  | 56.5%                   | 9.6             |  | 24.6%                   |
| August                             | 20.0            |  | 51.6%                   | 10.4            |  | 26.1%                   |
| September                          | 23.6            |  | 54.8%                   | 11.2            |  | 27.9%                   |
| October                            | 22.9            |  | 45.8%                   | 11.2            |  | 24.2%                   |
| November                           | 22.3            |  | 42.2%                   | 12.4            |  | 25.3%                   |





|           |        |        |                   |      |      |                   |      |      |                   |      |      |                   |      |      |                   |
|-----------|--------|--------|-------------------|------|------|-------------------|------|------|-------------------|------|------|-------------------|------|------|-------------------|
| March     | 1271.4 | 1119.1 | 1.14 (1.12, 1.15) | 68.0 | 74.0 | 0.92 (0.91, 0.93) | 32.8 | 42.7 | 0.77 (0.77, 0.77) | 26.8 | 34.6 | 0.77 (0.77, 0.78) | 33.5 | 40.5 | 0.83 (0.83, 0.83) |
| April     | 1400.4 | 1140.8 | 1.23 (1.21, 1.24) | 78.2 | 73.2 | 1.07 (1.06, 1.08) | 22.0 | 41.4 | 0.53 (0.53, 0.54) | 18.9 | 35.1 | 0.54 (0.53, 0.54) | 28.1 | 41.1 | 0.68 (0.68, 0.69) |
| May       | 1359.3 | 1119.6 | 1.21 (1.20, 1.23) | 80.6 | 69.4 | 1.16 (1.14, 1.18) | 23.5 | 39.1 | 0.60 (0.60, 0.61) | 20.9 | 34.1 | 0.61 (0.60, 0.62) | 31.4 | 41.2 | 0.76 (0.76, 0.76) |
| June      | 1322.9 | 1119.6 | 1.18 (1.17, 1.20) | 74.9 | 66.0 | 1.13 (1.12, 1.15) | 23.9 | 36.4 | 0.66 (0.65, 0.67) | 22.2 | 32.0 | 0.70 (0.68, 0.71) | 33.8 | 38.5 | 0.88 (0.88, 0.88) |
| July      | 1298.3 | 1121.3 | 1.16 (1.14, 1.17) | 74.5 | 59.6 | 1.25 (1.22, 1.28) | 25.3 | 32.9 | 0.77 (0.75, 0.78) | 24.5 | 29.5 | 0.83 (0.82, 0.84) | 37.9 | 35.1 | 1.08 (1.05, 1.11) |
| August    | 1287.9 | 1136.8 | 1.13 (1.12, 1.15) | 67.1 | 55.7 | 1.21 (1.17, 1.24) | 24.8 | 29.6 | 0.84 (0.83, 0.85) | 25.0 | 29.1 | 0.86 (0.85, 0.86) | 38.9 | 35.9 | 1.08 (1.05, 1.11) |
| September | 1290.2 | 1134.6 | 1.14 (1.12, 1.15) | 71.7 | 67.2 | 1.07 (1.04, 1.09) | 30.5 | 35.9 | 0.85 (0.83, 0.87) | 31.2 | 30.4 | 1.02 (1.00, 1.05) | 40.5 | 39.6 | 1.02 (1.02, 1.02) |
| October   | 1286.5 | 1149.6 | 1.12 (1.11, 1.13) | 70.4 | 67.7 | 1.04 (1.02, 1.06) | 25.8 | 40.6 | 0.63 (0.63, 0.64) | 27.8 | 30.8 | 0.90 (0.89, 0.92) | 41.1 | 38.3 | 1.07 (1.07, 1.08) |
| November  | -      | -      | -                 | 70.4 | 73.5 | 0.96 (0.95, 0.97) | 25.0 | 46.9 | 0.53 (0.53, 0.54) | 26.2 | 34.3 | 0.76 (0.76, 0.76) | 41.4 | 40.0 | 1.04 (1.03, 1.04) |



|           |       |       |                   |      |      |                   |      |      |                   |      |      |                   |      |      |                   |
|-----------|-------|-------|-------------------|------|------|-------------------|------|------|-------------------|------|------|-------------------|------|------|-------------------|
| March     | 538.2 | 509.9 | 1.06 (1.00, 1.11) | 53.0 | 59.9 | 0.89 (0.87, 0.90) | 35.4 | 43.4 | 0.81 (0.81, 0.82) | 29.4 | 34.4 | 0.85 (0.85, 0.86) | 36.9 | 41.9 | 0.88 (0.87, 0.89) |
| April     | 672.2 | 506.3 | 1.33 (1.26, 1.40) | 47.9 | 59.9 | 0.80 (0.78, 0.82) | 20.0 | 41.6 | 0.48 (0.48, 0.48) | 19.0 | 33.5 | 0.57 (0.55, 0.58) | 27.7 | 42.8 | 0.65 (0.64, 0.66) |
| May       | 743.3 | 520.1 | 1.43 (1.36, 1.51) | 47.3 | 55.1 | 0.86 (0.86, 0.86) | 23.1 | 39.7 | 0.58 (0.57, 0.59) | 21.8 | 32.7 | 0.67 (0.66, 0.68) | 30.2 | 41.6 | 0.73 (0.72, 0.73) |
| June      | 569.4 | 468.4 | 1.22 (1.15, 1.28) | 47.3 | 51.2 | 0.92 (0.91, 0.93) | 24.7 | 37.0 | 0.67 (0.65, 0.69) | 23.1 | 31.0 | 0.75 (0.70, 0.79) | 31.6 | 37.0 | 0.85 (0.85, 0.86) |
| July      | 548.1 | 454.6 | 1.21 (1.14, 1.27) | 48.7 | 47.7 | 1.02 (1.01, 1.03) | 28.1 | 33.4 | 0.84 (0.84, 0.85) | 25.3 | 27.9 | 0.91 (0.89, 0.93) | 36.2 | 33.5 | 1.08 (1.06, 1.11) |
| August    | 574.6 | 461.5 | 1.25 (1.18, 1.32) | 44.2 | 43.9 | 1.01 (0.98, 1.03) | 24.5 | 31.4 | 0.78 (0.77, 0.79) | 26.6 | 28.1 | 0.95 (0.93, 0.96) | 37.5 | 35.3 | 1.06 (1.05, 1.07) |
| September | 544.8 | 500.9 | 1.09 (1.03, 1.14) | 47.0 | 51.6 | 0.91 (0.89, 0.93) | 25.4 | 36.5 | 0.70 (0.69, 0.71) | 28.4 | 31.2 | 0.91 (0.88, 0.95) | 38.0 | 41.2 | 0.92 (0.91, 0.93) |
| October   | 630.9 | 512.6 | 1.23 (1.17, 1.30) | 47.6 | 52.1 | 0.91 (0.91, 0.92) | 22.6 | 39.5 | 0.57 (0.57, 0.57) | 24.8 | 29.6 | 0.84 (0.82, 0.85) | 37.0 | 39.8 | 0.93 (0.92, 0.93) |
| November  | 657.8 | 507.7 | 1.30 (1.23, 1.37) | 46.0 | 53.6 | 0.86 (0.85, 0.86) | 21.5 | 42.7 | 0.50 (0.50, 0.51) | 21.9 | 32.1 | 0.68 (0.67, 0.70) | 35.8 | 40.9 | 0.88 (0.86, 0.89) |



|           |      |      |                   |      |      |                   |      |      |                   |      |      |                   |       |       |                   |
|-----------|------|------|-------------------|------|------|-------------------|------|------|-------------------|------|------|-------------------|-------|-------|-------------------|
| Overall   | 32.7 | 38.2 | 0.86 (0.81, 0.90) | 31.3 | 38.1 | 0.82 (0.78, 0.86) | 30.5 | 37.4 | 0.81 (0.78, 0.85) | 29.9 | 37.4 | 0.80 (0.77, 0.83) | 28.56 | 36.71 | 0.78 (0.75, 0.81) |
| March     | 33.1 | 40.9 | 0.81 (0.80, 0.82) | 32.4 | 41.0 | 0.79 (0.78, 0.80) | 32.2 | 40.2 | 0.80 (0.79, 0.81) | 32.3 | 40.3 | 0.80 (0.79, 0.81) | 31.65 | 39.82 | 0.79 (0.78, 0.81) |
| April     | 26.9 | 40.8 | 0.66 (0.64, 0.67) | 25.5 | 40.9 | 0.62 (0.61, 0.64) | 25.0 | 40.4 | 0.62 (0.60, 0.63) | 24.7 | 40.5 | 0.61 (0.60, 0.62) | 23.57 | 39.85 | 0.59 (0.58, 0.60) |
| May       | 29.6 | 39.7 | 0.75 (0.71, 0.78) | 28.0 | 39.7 | 0.70 (0.68, 0.73) | 26.9 | 39.3 | 0.68 (0.66, 0.71) | 26.8 | 39.3 | 0.68 (0.66, 0.71) | 25.39 | 38.77 | 0.65 (0.64, 0.67) |
| June      | 30.8 | 37.6 | 0.82 (0.78, 0.86) | 29.1 | 37.5 | 0.77 (0.74, 0.81) | 28.3 | 36.9 | 0.77 (0.74, 0.80) | 27.7 | 36.6 | 0.76 (0.73, 0.78) | 26.26 | 35.55 | 0.74 (0.72, 0.76) |
| July      | 33.3 | 35.1 | 0.95 (0.89, 1.01) | 31.9 | 34.7 | 0.92 (0.87, 0.97) | 30.8 | 34.0 | 0.91 (0.86, 0.95) | 30.1 | 33.8 | 0.89 (0.86, 0.93) | 28.21 | 32.82 | 0.86 (0.83, 0.89) |
| August    | 33.4 | 34.2 | 0.98 (0.88, 1.07) | 31.9 | 33.7 | 0.95 (0.87, 1.04) | 30.9 | 33.0 | 0.94 (0.87, 1.02) | 29.9 | 32.8 | 0.91 (0.85, 0.98) | 28.23 | 31.97 | 0.88 (0.83, 0.94) |
| September | 38.2 | 35.8 | 1.07 (1.01, 1.13) | 36.6 | 35.9 | 1.02 (0.97, 1.07) | 35.4 | 35.5 | 1.00 (0.95, 1.04) | 34.4 | 36.1 | 0.95 (0.91, 1.00) | 32.91 | 35.87 | 0.92 (0.88, 0.95) |
| October   | 35.1 | 37.6 | 0.93 (0.91, 0.97) | 34.1 | 37.5 | 0.91 (0.89, 0.93) | 33.1 | 37.0 | 0.90 (0.87, 0.92) | 32.1 | 37.3 | 0.86 (0.83, 0.89) | 30.83 | 36.83 | 0.84 (0.81, 0.86) |
| November  | 34.3 | 41.7 | 0.82 (0.80, 0.85) | 33.1 | 41.5 | 0.80 (0.77, 0.82) | 32.2 | 40.7 | 0.79 (0.77, 0.82) | 31.6 | 40.6 | 0.78 (0.75, 0.81) | 30.14 | 39.57 | 0.76 (0.73, 0.79) |



|           |      |      |                   |      |      |                   |      |      |                   |      |      |                   |      |      |                   |
|-----------|------|------|-------------------|------|------|-------------------|------|------|-------------------|------|------|-------------------|------|------|-------------------|
| March     | 30.8 | 37.9 | 0.81 (0.80, 0.83) | 31.8 | 37.3 | 0.85 (0.84, 0.87) | 33.9 | 38.9 | 0.87 (0.85, 0.89) | 35.4 | 40.6 | 0.87 (0.85, 0.90) | 39.4 | 45.0 | 0.88 (0.86, 0.90) |
| April     | 21.0 | 35.9 | 0.59 (0.57, 0.61) | 21.2 | 36.0 | 0.59 (0.56, 0.62) | 22.3 | 39.2 | 0.57 (0.55, 0.58) | 23.3 | 41.1 | 0.57 (0.54, 0.60) | 27.2 | 45.1 | 0.60 (0.58, 0.63) |
| May       | 23.7 | 35.1 | 0.67 (0.65, 0.70) | 24.2 | 35.1 | 0.69 (0.66, 0.72) | 24.7 | 37.4 | 0.66 (0.64, 0.68) | 26.2 | 39.6 | 0.66 (0.63, 0.69) | 29.5 | 42.7 | 0.69 (0.66, 0.72) |
| June      | 23.8 | 32.7 | 0.73 (0.69, 0.76) | 25.5 | 32.4 | 0.79 (0.76, 0.82) | 26.2 | 34.3 | 0.76 (0.75, 0.78) | 27.5 | 36.3 | 0.76 (0.73, 0.79) | 32.0 | 40.1 | 0.80 (0.77, 0.82) |
| July      | 27.3 | 28.6 | 0.96 (0.93, 0.99) | 27.7 | 29.0 | 0.95 (0.92, 0.99) | 28.8 | 31.6 | 0.91 (0.89, 0.94) | 31.0 | 32.9 | 0.94 (0.89, 0.99) | 35.9 | 37.4 | 0.96 (0.94, 0.98) |
| August    | 27.1 | 28.5 | 0.95 (0.88, 1.02) | 27.9 | 29.1 | 0.96 (0.89, 1.03) | 28.4 | 31.2 | 0.91 (0.86, 0.97) | 30.6 | 32.9 | 0.93 (0.87, 1.00) | 34.9 | 36.6 | 0.95 (0.91, 1.00) |
| September | 27.6 | 32.5 | 0.85 (0.80, 0.90) | 29.0 | 32.6 | 0.89 (0.84, 0.95) | 30.7 | 35.4 | 0.87 (0.82, 0.91) | 30.7 | 37.3 | 0.82 (0.76, 0.89) | 37.1 | 43.9 | 0.84 (0.80, 0.89) |
| October   | 25.5 | 33.1 | 0.77 (0.75, 0.80) | 25.3 | 33.5 | 0.76 (0.73, 0.78) | 27.8 | 35.7 | 0.78 (0.75, 0.81) | 29.7 | 37.3 | 0.80 (0.76, 0.83) | 34.2 | 41.9 | 0.81 (0.78, 0.85) |
| November  | 24.2 | 35.5 | 0.68 (0.66, 0.70) | 24.2 | 35.8 | 0.68 (0.66, 0.69) | 25.8 | 38.2 | 0.67 (0.65, 0.70) | 27.4 | 39.6 | 0.69 (0.68, 0.71) | 31.7 | 43.3 | 0.73 (0.71, 0.76) |

**Table S9. ONTARIO: Observed, expected, adjusted relative change (RR, 95% CI) in primary care, well-child, and sick visits in Ontario, during post-pandemic months, by rurality.** All rates are weekly visit rates per 1000 population and do not include newborns.

|                                                  | Observed rate | Expected rate | RR (95% CI)       | Observed rate | Expected rate | RR (95% CI)       |
|--------------------------------------------------|---------------|---------------|-------------------|---------------|---------------|-------------------|
|                                                  | Urban         |               |                   | Rural         |               |                   |
| <b>All primary care visits</b>                   |               |               |                   |               |               |                   |
| Overall                                          | 41.1          | 51.8          | 0.79 (0.77, 0.82) | 24.0          | 28.0          | 0.86 (0.84, 0.88) |
| March                                            | 40.0          | 54.3          | 0.74 (0.73, 0.74) | 23.3          | 29.8          | 0.78 (0.77, 0.79) |
| April                                            | 30.5          | 53.1          | 0.58 (0.57, 0.58) | 20.1          | 29.0          | 0.69 (0.68, 0.70) |
| May                                              | 34.0          | 51.2          | 0.66 (0.65, 0.68) | 21.1          | 28.1          | 0.75 (0.74, 0.77) |
| June                                             | 35.7          | 48.6          | 0.74 (0.72, 0.75) | 20.7          | 26.6          | 0.78 (0.76, 0.80) |
| July                                             | 39.4          | 46.1          | 0.85 (0.83, 0.88) | 22.0          | 24.6          | 0.89 (0.88, 0.91) |
| August                                           | 40.6          | 46.6          | 0.87 (0.82, 0.92) | 22.7          | 25.2          | 0.90 (0.88, 0.92) |
| September                                        | 44.9          | 48.9          | 0.92 (0.90, 0.94) | 25.8          | 26.8          | 0.96 (0.94, 0.99) |
| October                                          | 52.3          | 53.8          | 0.97 (0.95, 0.99) | 28.2          | 29.5          | 0.95 (0.94, 0.97) |
| November                                         | 54.9          | 63.3          | 0.87 (0.83, 0.90) | 33.2          | 34.1          | 0.98 (0.94, 1.02) |
| <b>Well-child visits</b>                         |               |               |                   |               |               |                   |
| Overall                                          | 9.2           | 12.6          | 0.73 (0.66, 0.80) | 6.1           | 8.1           | 0.75 (0.69, 0.82) |
| March                                            | 6.4           | 12.2          | 0.52 (0.49, 0.56) | 4.5           | 8.3           | 0.55 (0.54, 0.56) |
| April                                            | 4.5           | 11.3          | 0.40 (0.37, 0.43) | 3.6           | 7.4           | 0.49 (0.47, 0.51) |
| May                                              | 5.6           | 10.8          | 0.52 (0.46, 0.58) | 4.2           | 7.2           | 0.58 (0.54, 0.64) |
| June                                             | 6.0           | 10.8          | 0.55 (0.51, 0.61) | 4.3           | 7.0           | 0.63 (0.56, 0.70) |
| July                                             | 7.1           | 12.1          | 0.58 (0.56, 0.61) | 5.0           | 7.4           | 0.67 (0.63, 0.70) |
| August                                           | 8.2           | 13.4          | 0.61 (0.57, 0.66) | 5.8           | 8.5           | 0.69 (0.64, 0.74) |
| September                                        | 7.8           | 10.9          | 0.71 (0.63, 0.80) | 5.6           | 7.5           | 0.75 (0.69, 0.81) |
| October                                          | 17.8          | 13.9          | 1.28 (1.21, 1.36) | 9.0           | 9.1           | 0.99 (0.94, 1.05) |
| November                                         | 21.2          | 17.9          | 1.19 (1.04, 1.36) | 13.7          | 11.2          | 1.23 (1.06, 1.43) |
| <b>Well-child visits (with immunizations)</b>    |               |               |                   |               |               |                   |
| Overall                                          | 8.1           | 9.7           | 0.83 (0.73, 0.95) | 5.0           | 6.0           | 0.84 (0.76, 0.94) |
| March                                            | 5.1           | 9.0           | 0.56 (0.54, 0.59) | 3.4           | 6.1           | 0.56 (0.54, 0.58) |
| April                                            | 4.1           | 7.8           | 0.53 (0.48, 0.58) | 3.0           | 5.1           | 0.60 (0.57, 0.64) |
| May                                              | 4.9           | 7.3           | 0.68 (0.58, 0.79) | 3.5           | 4.8           | 0.72 (0.64, 0.81) |
| June                                             | 5.1           | 7.1           | 0.72 (0.61, 0.84) | 3.4           | 4.5           | 0.74 (0.64, 0.86) |
| July                                             | 5.8           | 7.4           | 0.79 (0.69, 0.92) | 3.8           | 4.7           | 0.80 (0.71, 0.90) |
| August                                           | 6.6           | 8.4           | 0.78 (0.73, 0.84) | 4.5           | 5.7           | 0.79 (0.74, 0.84) |
| September                                        | 6.3           | 7.7           | 0.82 (0.70, 0.95) | 4.2           | 5.1           | 0.83 (0.74, 0.92) |
| October                                          | 16.6          | 12.3          | 1.35 (1.20, 1.51) | 7.9           | 7.2           | 1.10 (1.02, 1.19) |
| November                                         | 20.1          | 19.1          | 1.05 (0.85, 1.30) | 12.6          | 10.5          | 1.20 (1.00, 1.44) |
| <b>Well-child visits (without immunizations)</b> |               |               |                   |               |               |                   |
| Overall                                          | 1.1           | 2.9           | 0.38 (0.35, 0.41) | 1.1           | 2.1           | 0.50 (0.48, 0.53) |
| March                                            | 1.3           | 3.1           | 0.43 (0.41, 0.44) | 1.1           | 2.2           | 0.52 (0.50, 0.53) |
| April                                            | 0.4           | 2.8           | 0.14 (0.14, 0.15) | 0.6           | 2.2           | 0.26 (0.25, 0.27) |
| May                                              | 0.6           | 2.7           | 0.23 (0.21, 0.25) | 0.7           | 2.1           | 0.35 (0.34, 0.36) |
| June                                             | 0.9           | 2.8           | 0.31 (0.30, 0.33) | 1.0           | 2.1           | 0.46 (0.44, 0.48) |
| July                                             | 1.2           | 3.3           | 0.37 (0.34, 0.39) | 1.2           | 2.2           | 0.53 (0.51, 0.55) |
| August                                           | 1.6           | 3.9           | 0.40 (0.35, 0.47) | 1.3           | 2.4           | 0.55 (0.49, 0.62) |
| September                                        | 1.5           | 3.1           | 0.47 (0.46, 0.49) | 1.4           | 2.3           | 0.59 (0.57, 0.62) |
| October                                          | 1.2           | 2.7           | 0.43 (0.42, 0.44) | 1.2           | 2.2           | 0.54 (0.54, 0.55) |
| November                                         | 1.2           | 2.7           | 0.44 (0.43, 0.46) | 1.2           | 2.1           | 0.55 (0.54, 0.57) |
| <b>Sick visits</b>                               |               |               |                   |               |               |                   |
| Overall                                          | 31.9          | 39.3          | 0.81 (0.78, 0.85) | 17.9          | 19.9          | 0.90 (0.86, 0.94) |
| March                                            | 33.6          | 42.3          | 0.80 (0.79, 0.80) | 18.8          | 21.6          | 0.87 (0.86, 0.88) |
| April                                            | 26.0          | 42.4          | 0.61 (0.60, 0.63) | 16.5          | 21.6          | 0.76 (0.75, 0.77) |
| May                                              | 28.4          | 41.1          | 0.69 (0.67, 0.72) | 16.9          | 21.1          | 0.80 (0.78, 0.83) |
| June                                             | 29.7          | 38.5          | 0.77 (0.74, 0.80) | 16.4          | 19.8          | 0.83 (0.80, 0.85) |
| July                                             | 32.3          | 35.7          | 0.91 (0.86, 0.95) | 17.0          | 17.7          | 0.96 (0.92, 1.00) |
| August                                           | 32.4          | 34.7          | 0.93 (0.86, 1.01) | 16.8          | 17.3          | 0.97 (0.90, 1.05) |
| September                                        | 37.1          | 37.4          | 0.99 (0.95, 1.04) | 20.2          | 19.2          | 1.05 (1.00, 1.11) |
| October                                          | 34.5          | 38.9          | 0.89 (0.86, 0.91) | 19.2          | 20.3          | 0.94 (0.91, 0.98) |
| November                                         | 33.6          | 42.7          | 0.79 (0.76, 0.82) | 19.5          | 22.1          | 0.88 (0.87, 0.90) |



**Table S10. MANITOBA: Observed, expected, adjusted relative change (RR, 95% CI) in primary care, well-child, and sick visits in Ontario, during post-pandemic months, by rurality.** All rates are weekly visit rates per 1000 population and do not include newborns.

|                                                  | Observed rate | Expected rate | RR (95% CI)       | Observed rate | Expected rate | RR (95% CI)       |
|--------------------------------------------------|---------------|---------------|-------------------|---------------|---------------|-------------------|
|                                                  | Urban         |               |                   | Rural         |               |                   |
| <b>All primary care visits</b>                   |               |               |                   |               |               |                   |
| Overall                                          | 44.9          | 54.0          | 0.83 (0.80, 0.86) | 26.0          | 33.5          | 0.78 (0.75, 0.80) |
| March                                            | 46.7          | 56.9          | 0.82 (0.80, 0.84) | 28.6          | 35.2          | 0.81 (0.80, 0.82) |
| April                                            | 32.7          | 55.5          | 0.59 (0.57, 0.61) | 19.7          | 35.4          | 0.56 (0.54, 0.57) |
| May                                              | 37.6          | 53.7          | 0.70 (0.68, 0.72) | 22.8          | 34.3          | 0.67 (0.65, 0.69) |
| June                                             | 40.0          | 50.5          | 0.79 (0.77, 0.81) | 24.6          | 32.4          | 0.76 (0.75, 0.77) |
| July                                             | 44.6          | 47.0          | 0.95 (0.92, 0.98) | 27.2          | 29.9          | 0.91 (0.89, 0.92) |
| August                                           | 45.6          | 49.0          | 0.93 (0.89, 0.98) | 26.6          | 29.7          | 0.89 (0.85, 0.94) |
| September                                        | 45.8          | 52.8          | 0.87 (0.83, 0.90) | 27.9          | 33.8          | 0.82 (0.79, 0.86) |
| October                                          | 54.4          | 57.8          | 0.94 (0.92, 0.96) | 27.8          | 34.6          | 0.80 (0.77, 0.84) |
| November                                         | 58.2          | 62.4          | 0.93 (0.90, 0.97) | 29.2          | 36.4          | 0.80 (0.78, 0.83) |
| <b>Well-child visits</b>                         |               |               |                   |               |               |                   |
| Overall                                          | 13.4          | 14.0          | 0.96 (0.89, 1.03) | 3.9           | 4.8           | 0.82 (0.77, 0.87) |
| March                                            | 8.4           | 12.7          | 0.67 (0.64, 0.69) | 3.0           | 4.6           | 0.65 (0.64, 0.66) |
| April                                            | 7.0           | 12.1          | 0.58 (0.56, 0.59) | 2.4           | 4.5           | 0.53 (0.52, 0.54) |
| May                                              | 9.3           | 11.9          | 0.78 (0.76, 0.80) | 3.0           | 4.6           | 0.65 (0.62, 0.67) |
| June                                             | 10.4          | 12.1          | 0.85 (0.83, 0.88) | 3.4           | 4.3           | 0.78 (0.75, 0.82) |
| July                                             | 11.3          | 12.2          | 0.93 (0.89, 0.97) | 3.8           | 4.5           | 0.85 (0.82, 0.87) |
| August                                           | 12.5          | 14.3          | 0.87 (0.81, 0.94) | 4.0           | 4.9           | 0.82 (0.75, 0.89) |
| September                                        | 11.6          | 13.2          | 0.88 (0.86, 0.90) | 3.6           | 4.8           | 0.75 (0.73, 0.77) |
| October                                          | 23.2          | 18.2          | 1.27 (1.12, 1.45) | 5.1           | 5.7           | 0.90 (0.81, 0.98) |
| November                                         | 29.2          | 20.3          | 1.44 (1.25, 1.66) | 7.6           | 6.0           | 1.27 (1.12, 1.43) |
| <b>Well-child visits (with immunizations)</b>    |               |               |                   |               |               |                   |
| Overall                                          | 8.5           | 8.5           | 1.01 (0.86, 1.18) | 2.1           | 2.2           | 0.93 (0.80, 1.08) |
| March                                            | 4.3           | 6.2           | 0.69 (0.59, 0.82) | 1.3           | 1.8           | 0.69 (0.61, 0.79) |
| April                                            | 3.6           | 5.9           | 0.61 (0.54, 0.69) | 1.1           | 1.8           | 0.61 (0.56, 0.67) |
| May                                              | 4.6           | 5.7           | 0.81 (0.70, 0.94) | 1.3           | 1.7           | 0.78 (0.68, 0.90) |
| June                                             | 4.8           | 6.2           | 0.78 (0.66, 0.92) | 1.4           | 1.8           | 0.78 (0.66, 0.92) |
| July                                             | 5.4           | 6.0           | 0.90 (0.73, 1.09) | 1.5           | 1.8           | 0.84 (0.73, 0.96) |
| August                                           | 5.8           | 6.9           | 0.84 (0.75, 0.93) | 1.7           | 2.0           | 0.84 (0.79, 0.90) |
| September                                        | 6.2           | 6.8           | 0.92 (0.80, 1.05) | 1.6           | 2.0           | 0.79 (0.70, 0.88) |
| October                                          | 19.4          | 14.6          | 1.33 (1.08, 1.63) | 3.3           | 3.4           | 0.99 (0.81, 1.21) |
| November                                         | 25.5          | 17.0          | 1.49 (1.25, 1.79) | 6.0           | 3.8           | 1.58 (1.25, 2.01) |
| <b>Well-child visits (without immunizations)</b> |               |               |                   |               |               |                   |
| Overall                                          | 4.8           | 5.7           | 0.86 (0.75, 0.98) | 1.9           | 2.6           | 0.71 (0.65, 0.77) |
| March                                            | 4.1           | 6.1           | 0.67 (0.61, 0.75) | 1.7           | 2.7           | 0.63 (0.60, 0.66) |
| April                                            | 3.4           | 5.9           | 0.58 (0.53, 0.64) | 1.3           | 2.7           | 0.48 (0.46, 0.51) |
| May                                              | 4.7           | 5.8           | 0.80 (0.73, 0.89) | 1.6           | 2.8           | 0.59 (0.53, 0.65) |
| June                                             | 5.5           | 5.8           | 0.95 (0.84, 1.08) | 2.0           | 2.5           | 0.79 (0.75, 0.83) |
| July                                             | 6.0           | 5.9           | 1.02 (0.86, 1.20) | 2.3           | 2.7           | 0.85 (0.78, 0.94) |
| August                                           | 6.7           | 7.0           | 0.95 (0.76, 1.18) | 2.3           | 2.9           | 0.80 (0.67, 0.96) |
| September                                        | 5.4           | 6.1           | 0.87 (0.76, 1.01) | 2.0           | 2.8           | 0.73 (0.69, 0.78) |
| October                                          | 3.8           | 5.0           | 0.77 (0.69, 0.86) | 1.7           | 2.6           | 0.67 (0.63, 0.72) |
| November                                         | 3.8           | 4.7           | 0.80 (0.71, 0.90) | 1.7           | 2.5           | 0.66 (0.62, 0.70) |
| <b>Sick visits</b>                               |               |               |                   |               |               |                   |
| Overall                                          | 31.5          | 40.0          | 0.79 (0.76, 0.82) | 22.1          | 28.7          | 0.77 (0.74, 0.80) |
| March                                            | 38.2          | 44.2          | 0.86 (0.85, 0.88) | 25.6          | 30.6          | 0.84 (0.83, 0.84) |
| April                                            | 25.7          | 43.3          | 0.59 (0.57, 0.61) | 17.3          | 30.9          | 0.56 (0.54, 0.58) |
| May                                              | 28.3          | 41.7          | 0.68 (0.65, 0.71) | 19.9          | 29.7          | 0.67 (0.64, 0.70) |
| June                                             | 29.6          | 38.4          | 0.77 (0.74, 0.80) | 21.3          | 28.1          | 0.76 (0.74, 0.77) |
| July                                             | 33.3          | 34.8          | 0.96 (0.92, 0.99) | 23.3          | 25.4          | 0.92 (0.90, 0.93) |
| August                                           | 33.1          | 34.8          | 0.95 (0.89, 1.02) | 22.6          | 24.9          | 0.91 (0.86, 0.96) |
| September                                        | 34.2          | 39.6          | 0.86 (0.81, 0.92) | 24.2          | 29.0          | 0.84 (0.79, 0.89) |
| October                                          | 31.2          | 39.6          | 0.79 (0.76, 0.81) | 22.7          | 28.9          | 0.79 (0.75, 0.83) |
| November                                         | 28.9          | 42.0          | 0.69 (0.67, 0.70) | 21.6          | 30.4          | 0.71 (0.68, 0.74) |

**Table S11. ONTARIO: Observed, expected, and adjusted relative change (RR, 95% CI) in primary care, well-child, and sick visits in Ontario, during post-pandemic months, by immigrant status.** All rates are weekly visit rates per 1000 population and do not include children <3 years.

|                                                  | Observed rate | Expected rate | RR (95% CI)       | Observed rate | Expected rate | RR (95% CI)       | Observed rate | Expected rate | RR (95% CI)       |
|--------------------------------------------------|---------------|---------------|-------------------|---------------|---------------|-------------------|---------------|---------------|-------------------|
|                                                  | Immigrants    |               |                   | Refugees      |               |                   | Canadian-born |               |                   |
| <b>All primary care visits</b>                   |               |               |                   |               |               |                   |               |               |                   |
| Overall                                          | 28.9          | 36.0          | 0.80 (0.76, 0.84) | 32.5          | 42.0          | 0.77 (0.72, 0.83) | 31.1          | 39.1          | 0.80 (0.77, 0.82) |
| March                                            | 28.7          | 39.8          | 0.72 (0.70, 0.74) | 36.7          | 47.3          | 0.78 (0.72, 0.83) | 30.3          | 40.8          | 0.74 (0.74, 0.75) |
| April                                            | 18.5          | 38.2          | 0.48 (0.47, 0.50) | 20.5          | 45.4          | 0.45 (0.42, 0.48) | 21.8          | 40.3          | 0.54 (0.53, 0.55) |
| May                                              | 21.8          | 36.7          | 0.59 (0.57, 0.62) | 23.2          | 42.1          | 0.55 (0.50, 0.60) | 24.2          | 38.9          | 0.62 (0.60, 0.64) |
| June                                             | 26.1          | 34.4          | 0.76 (0.72, 0.80) | 27.9          | 37.6          | 0.74 (0.68, 0.81) | 25.9          | 36.8          | 0.70 (0.68, 0.73) |
| July                                             | 29.0          | 32.9          | 0.88 (0.82, 0.95) | 31.1          | 37.0          | 0.84 (0.77, 0.91) | 29.1          | 35.1          | 0.83 (0.80, 0.86) |
| August                                           | 30.9          | 34.6          | 0.89 (0.82, 0.97) | 33.1          | 38.3          | 0.86 (0.79, 0.95) | 31.1          | 36.6          | 0.85 (0.81, 0.89) |
| September                                        | 30.5          | 33.1          | 0.92 (0.87, 0.97) | 36.6          | 38.6          | 0.95 (0.88, 1.02) | 34.8          | 36.3          | 0.96 (0.93, 1.00) |
| October                                          | 37.6          | 35.4          | 1.06 (1.02, 1.10) | 42.6          | 42.3          | 1.01 (0.95, 1.06) | 41.2          | 40.2          | 1.02 (1.00, 1.05) |
| November                                         | 38.0          | 41.1          | 0.93 (0.90, 0.95) | 41.5          | 50.1          | 0.83 (0.81, 0.85) | 43.4          | 47.4          | 0.92 (0.88, 0.96) |
| <b>Well-child visits</b>                         |               |               |                   |               |               |                   |               |               |                   |
| Overall                                          | 3.0           | 5.6           | 0.54 (0.51, 0.58) | 3.3           | 5.9           | 0.56 (0.52, 0.61) | 3.9           | 6.0           | 0.64 (0.60, 0.69) |
| March                                            | 2.1           | 5.6           | 0.37 (0.36, 0.39) | 3.0           | 6.7           | 0.44 (0.39, 0.50) | 2.1           | 5.3           | 0.40 (0.40, 0.41) |
| April                                            | 0.2           | 4.3           | 0.05 (0.05, 0.05) | 0.2           | 5.3           | 0.03 (0.03, 0.03) | 0.3           | 4.6           | 0.07 (0.07, 0.07) |
| May                                              | 0.4           | 3.3           | 0.11 (0.10, 0.11) | 0.4           | 4.1           | 0.09 (0.09, 0.10) | 0.6           | 4.0           | 0.15 (0.14, 0.17) |
| June                                             | 0.8           | 3.5           | 0.24 (0.23, 0.25) | 0.7           | 3.3           | 0.20 (0.19, 0.21) | 1.1           | 4.2           | 0.26 (0.24, 0.28) |
| July                                             | 1.3           | 4.4           | 0.29 (0.28, 0.31) | 1.1           | 4.0           | 0.28 (0.26, 0.29) | 1.7           | 5.3           | 0.32 (0.30, 0.34) |
| August                                           | 1.8           | 5.7           | 0.32 (0.30, 0.33) | 2.2           | 5.3           | 0.41 (0.40, 0.42) | 3.1           | 7.1           | 0.44 (0.41, 0.47) |
| September                                        | 1.5           | 3.8           | 0.40 (0.36, 0.44) | 1.6           | 3.8           | 0.41 (0.37, 0.46) | 2.3           | 4.4           | 0.53 (0.47, 0.60) |
| October                                          | 9.7           | 7.1           | 1.38 (1.30, 1.46) | 10.5          | 7.0           | 1.49 (1.40, 1.59) | 10.9          | 7.4           | 1.48 (1.35, 1.61) |
| November                                         | 10.6          | 10.8          | 0.98 (0.95, 1.02) | 11.5          | 11.3          | 1.01 (0.97, 1.06) | 14.1          | 11.2          | 1.26 (1.16, 1.37) |
| <b>Well-child visits (with immunizations)</b>    |               |               |                   |               |               |                   |               |               |                   |
| Overall                                          | 2.5           | 3.8           | 0.66 (0.60, 0.73) | 2.8           | 4.7           | 0.59 (0.52, 0.67) | 3.4           | 4.3           | 0.80 (0.69, 0.92) |
| March                                            | 1.4           | 3.7           | 0.38 (0.36, 0.40) | 2.4           | 5.3           | 0.46 (0.41, 0.51) | 1.4           | 3.6           | 0.40 (0.39, 0.41) |
| April                                            | 0.2           | 2.6           | 0.06 (0.06, 0.06) | 0.1           | 3.9           | 0.03 (0.02, 0.03) | 0.3           | 2.7           | 0.10 (0.09, 0.10) |
| May                                              | 0.2           | 1.8           | 0.13 (0.12, 0.14) | 0.3           | 2.8           | 0.09 (0.09, 0.10) | 0.5           | 2.3           | 0.22 (0.19, 0.25) |
| June                                             | 0.5           | 1.8           | 0.28 (0.26, 0.31) | 0.4           | 1.9           | 0.20 (0.18, 0.22) | 0.8           | 2.3           | 0.36 (0.31, 0.42) |
| July                                             | 0.6           | 1.9           | 0.34 (0.30, 0.38) | 0.5           | 2.2           | 0.21 (0.19, 0.23) | 1.2           | 2.5           | 0.49 (0.41, 0.58) |
| August                                           | 0.9           | 2.8           | 0.32 (0.28, 0.37) | 1.0           | 3.3           | 0.30 (0.26, 0.35) | 2.3           | 3.7           | 0.60 (0.50, 0.73) |
| September                                        | 0.7           | 2.1           | 0.35 (0.29, 0.41) | 0.8           | 2.5           | 0.33 (0.27, 0.40) | 1.7           | 2.5           | 0.67 (0.57, 0.79) |
| October                                          | 9.2           | 5.7           | 1.62 (1.51, 1.74) | 9.8           | 6.0           | 1.65 (1.53, 1.79) | 10.5          | 6.3           | 1.66 (1.44, 1.92) |
| November                                         | 10.0          | 10.1          | 0.99 (0.95, 1.05) | 10.6          | 12.1          | 0.88 (0.83, 0.92) | 13.5          | 11.6          | 1.16 (1.01, 1.34) |
| <b>Well-child visits (without immunizations)</b> |               |               |                   |               |               |                   |               |               |                   |
| Overall                                          | 0.5           | 1.9           | 0.28 (0.26, 0.30) | 0.6           | 1.3           | 0.42 (0.36, 0.50) | 0.5           | 1.8           | 0.26 (0.25, 0.27) |
| March                                            | 0.7           | 2.3           | 0.32 (0.29, 0.35) | 0.5           | 1.8           | 0.30 (0.25, 0.35) | 0.7           | 1.9           | 0.36 (0.35, 0.38) |
| April                                            | 0.1           | 1.7           | 0.03 (0.03, 0.04) | 0.1           | 1.3           | 0.04 (0.03, 0.05) | 0.1           | 1.6           | 0.04 (0.04, 0.04) |
| May                                              | 0.1           | 1.5           | 0.08 (0.08, 0.08) | 0.1           | 1.3           | 0.10 (0.09, 0.11) | 0.1           | 1.5           | 0.08 (0.08, 0.08) |
| June                                             | 0.3           | 1.7           | 0.19 (0.18, 0.21) | 0.3           | 1.2           | 0.24 (0.22, 0.27) | 0.3           | 1.7           | 0.17 (0.16, 0.18) |
| July                                             | 0.6           | 2.4           | 0.26 (0.25, 0.28) | 0.6           | 1.5           | 0.42 (0.36, 0.50) | 0.5           | 2.1           | 0.22 (0.21, 0.24) |
| August                                           | 0.9           | 2.9           | 0.30 (0.27, 0.34) | 1.2           | 1.9           | 0.60 (0.51, 0.70) | 0.9           | 2.9           | 0.30 (0.28, 0.32) |

Appendix 1, as supplied by the authors. Appendix to: Saunders N, Guttman A, Brownell M, et al. Pediatric primary care in Ontario and Manitoba after the onset of the COVID-19 pandemic: a population-based study. *CMAJ Open* 2021. DOI:10.9778/cmajo.20210161. Copyright © 2021 The Author(s) or their employer(s). To receive this resource in an accessible format, please contact us at [cmajgroup.cmaj.ca](mailto:cmajgroup.cmaj.ca).

|                    |            |            |                          |      |      |                   |      |      |                   |
|--------------------|------------|------------|--------------------------|------|------|-------------------|------|------|-------------------|
| September          | 0.8        | 1.8        | 0.44 (0.42, 0.46)        | 0.8  | 1.2  | 0.64 (0.58, 0.70) | 0.7  | 1.9  | 0.35 (0.34, 0.35) |
| October            | 0.5        | 1.5        | 0.34 (0.33, 0.36)        | 0.6  | 1.0  | 0.61 (0.50, 0.74) | 0.5  | 1.7  | 0.29 (0.28, 0.30) |
| November           | 0.6        | 1.5        | 0.36 (0.35, 0.38)        | 0.8  | 1.1  | 0.73 (0.57, 0.95) | 0.5  | 1.7  | 0.30 (0.29, 0.32) |
| <b>Sick visits</b> | <b>0.5</b> | <b>1.9</b> | <b>0.28 (0.26, 0.30)</b> |      |      |                   |      |      |                   |
| Overall            | 25.9       | 30.5       | 0.85 (0.80, 0.90)        | 29.1 | 36.3 | 0.80 (0.74, 0.87) | 27.2 | 33.1 | 0.82 (0.79, 0.86) |
| March              | 26.6       | 34.2       | 0.78 (0.76, 0.80)        | 33.8 | 40.7 | 0.83 (0.78, 0.88) | 28.2 | 35.4 | 0.80 (0.78, 0.81) |
| April              | 18.3       | 34.1       | 0.54 (0.52, 0.55)        | 20.4 | 40.8 | 0.50 (0.47, 0.53) | 21.4 | 35.8 | 0.60 (0.59, 0.61) |
| May                | 21.5       | 33.8       | 0.64 (0.60, 0.67)        | 22.8 | 38.9 | 0.59 (0.53, 0.64) | 23.6 | 35.0 | 0.67 (0.65, 0.70) |
| June               | 25.2       | 31.3       | 0.81 (0.76, 0.86)        | 27.3 | 35.4 | 0.77 (0.71, 0.84) | 24.8 | 32.8 | 0.76 (0.73, 0.79) |
| July               | 27.7       | 29.1       | 0.95 (0.88, 1.03)        | 30.0 | 33.9 | 0.88 (0.81, 0.96) | 27.4 | 30.4 | 0.90 (0.86, 0.95) |
| August             | 29.1       | 29.4       | 0.99 (0.90, 1.09)        | 31.0 | 33.5 | 0.93 (0.83, 1.03) | 28.0 | 30.1 | 0.93 (0.87, 0.99) |
| September          | 28.9       | 28.9       | 1.00 (0.93, 1.08)        | 35.0 | 35.5 | 0.99 (0.90, 1.08) | 32.5 | 31.6 | 1.03 (0.98, 1.09) |
| October            | 27.9       | 28.1       | 0.99 (0.94, 1.05)        | 32.1 | 35.1 | 0.91 (0.85, 0.98) | 30.2 | 32.5 | 0.93 (0.89, 0.97) |
| November           | 27.5       | 29.3       | 0.94 (0.91, 0.96)        | 30.0 | 36.5 | 0.82 (0.79, 0.85) | 29.4 | 35.4 | 0.83 (0.81, 0.86) |

**eTable S12. MANITOBA: Observed, expected, and adjusted relative change (RR, 95% CI) in primary care, well-child, and sick visits in Manitoba, during post-pandemic months, by immigrant status.** All rates are weekly visit rates per 1000 population and do not include children <3 years.

|                                                  | Observed rate | Expected rate | RR (95% CI)       | Observed rate | Expected rate | RR (95% CI)       | Observed rate | Expected rate | RR (95% CI)       |
|--------------------------------------------------|---------------|---------------|-------------------|---------------|---------------|-------------------|---------------|---------------|-------------------|
|                                                  | Immigrants    |               |                   | Refugees      |               |                   | Canadian-born |               |                   |
| <b>All primary care visits</b>                   |               |               |                   |               |               |                   |               |               |                   |
| Overall                                          | 29.4          | 33.8          | 0.87 (0.80, 0.95) | 35.3          | 37.7          | 0.94 (0.88, 1.00) | 34.5          | 41.6          | 0.83 (0.81, 0.85) |
| March                                            | 29.6          | 37.2          | 0.80 (0.77, 0.83) | 39.2          | 39.6          | 0.99 (0.93, 1.06) | 36.1          | 43.7          | 0.83 (0.81, 0.84) |
| April                                            | 16.1          | 34.4          | 0.47 (0.43, 0.50) | 27.1          | 40.3          | 0.67 (0.63, 0.72) | 24.1          | 43.0          | 0.56 (0.54, 0.58) |
| May                                              | 21.9          | 34.1          | 0.64 (0.60, 0.69) | 27.1          | 38.6          | 0.70 (0.67, 0.74) | 28.4          | 42.1          | 0.68 (0.66, 0.70) |
| June                                             | 26.9          | 30.7          | 0.88 (0.83, 0.93) | 34.6          | 33.7          | 1.03 (0.98, 1.08) | 30.3          | 39.1          | 0.77 (0.75, 0.80) |
| July                                             | 33.5          | 32.3          | 1.04 (0.91, 1.18) | 36.5          | 35.2          | 1.04 (1.00, 1.08) | 34.1          | 35.3          | 0.97 (0.95, 0.99) |
| August                                           | 33.1          | 33.6          | 0.99 (0.87, 1.13) | 37.0          | 36.5          | 1.01 (0.95, 1.08) | 35.9          | 37.6          | 0.96 (0.93, 0.99) |
| September                                        | 29.8          | 31.5          | 0.95 (0.85, 1.05) | 31.2          | 36.6          | 0.85 (0.79, 0.92) | 36.4          | 41.5          | 0.88 (0.84, 0.91) |
| October                                          | 36.7          | 34.7          | 1.06 (1.00, 1.12) | 43.5          | 39.9          | 1.09 (1.02, 1.16) | 41.9          | 44.7          | 0.94 (0.91, 0.96) |
| November                                         | 37.7          | 36.8          | 1.02 (1.00, 1.05) | 42.5          | 40.5          | 1.05 (0.97, 1.13) | 44.1          | 48.1          | 0.92 (0.89, 0.94) |
| <b>Well-child visits</b>                         |               |               |                   |               |               |                   |               |               |                   |
| Overall                                          | 6.8           | 6.3           | 1.08 (1.00, 1.17) | 5.6           | 5.0           | 1.10 (0.95, 1.28) | 6.6           | 6.9           | 0.95 (0.92, 0.99) |
| March                                            | 3.3           | 5.4           | 0.61 (0.57, 0.66) | 3.3           | 4.3           | 0.76 (0.64, 0.89) | 3.2           | 5.8           | 0.56 (0.54, 0.58) |
| April                                            | 0.8           | 4.9           | 0.17 (0.17, 0.18) | 2.3           | 4.5           | 0.52 (0.45, 0.61) | 1.8           | 5.5           | 0.33 (0.32, 0.34) |
| May                                              | 2.9           | 4.7           | 0.61 (0.60, 0.63) | 2.9           | 3.6           | 0.80 (0.67, 0.96) | 3.4           | 5.6           | 0.62 (0.60, 0.64) |
| June                                             | 4.6           | 4.9           | 0.94 (0.89, 0.99) | 4.1           | 3.7           | 1.11 (0.88, 1.40) | 4.3           | 5.4           | 0.80 (0.77, 0.83) |
| July                                             | 5.9           | 5.9           | 0.99 (0.87, 1.13) | 4.4           | 3.6           | 1.24 (1.12, 1.37) | 5.2           | 5.7           | 0.92 (0.87, 0.96) |
| August                                           | 6.2           | 6.8           | 0.92 (0.81, 1.03) | 5.8           | 4.5           | 1.29 (1.15, 1.45) | 6.4           | 7.5           | 0.85 (0.82, 0.88) |
| September                                        | 5.2           | 5.1           | 1.01 (0.94, 1.09) | 3.0           | 3.8           | 0.81 (0.72, 0.91) | 5.3           | 6.4           | 0.84 (0.81, 0.86) |
| October                                          | 15.4          | 9.1           | 1.69 (1.58, 1.80) | 10.8          | 8.9           | 1.21 (1.11, 1.31) | 13.5          | 10.0          | 1.35 (1.29, 1.40) |
| November                                         | 18.8          | 10.3          | 1.82 (1.70, 1.95) | 14.6          | 9.4           | 1.56 (1.31, 1.84) | 17.7          | 11.1          | 1.59 (1.49, 1.69) |
| <b>Well-child visits (with immunizations)</b>    |               |               |                   |               |               |                   |               |               |                   |
| Overall                                          | 4.2           | 3.0           | 1.40 (1.22, 1.59) | 3.2           | 2.7           | 1.17 (0.88, 1.56) | 3.9           | 3.4           | 1.16 (0.96, 1.40) |
| March                                            | 1.3           | 1.9           | 0.68 (0.62, 0.75) | 0.8           | 1.9           | 0.41 (0.30, 0.57) | 1.1           | 1.8           | 0.59 (0.54, 0.64) |
| April                                            | 0.3           | 1.7           | 0.18 (0.16, 0.21) | 0.9           | 1.6           | 0.54 (0.39, 0.74) | 0.4           | 1.8           | 0.24 (0.20, 0.29) |
| May                                              | 0.9           | 1.5           | 0.57 (0.48, 0.67) | 0.9           | 1.4           | 0.67 (0.55, 0.81) | 1.0           | 1.7           | 0.59 (0.50, 0.70) |
| June                                             | 1.4           | 1.7           | 0.81 (0.67, 0.97) | 1.1           | 0.9           | 1.29 (1.00, 1.67) | 1.4           | 1.7           | 0.80 (0.64, 1.00) |
| July                                             | 2.0           | 1.8           | 1.14 (1.06, 1.23) | 1.0           | 1.2           | 0.79 (0.57, 1.10) | 1.8           | 1.8           | 1.01 (0.84, 1.20) |
| August                                           | 2.0           | 2.0           | 1.00 (0.91, 1.10) | 1.2           | 1.4           | 0.87 (0.56, 1.35) | 2.2           | 2.3           | 0.98 (0.74, 1.28) |
| September                                        | 2.2           | 1.9           | 1.19 (1.12, 1.25) | 1.6           | 1.6           | 0.99 (0.76, 1.28) | 2.4           | 2.3           | 1.01 (0.92, 1.11) |
| October                                          | 13.1          | 6.7           | 1.94 (1.68, 2.25) | 9.7           | 7.0           | 1.39 (1.19, 1.62) | 11.4          | 7.7           | 1.48 (1.24, 1.77) |
| November                                         | 17.1          | 7.8           | 2.19 (1.87, 2.57) | 12.9          | 7.7           | 1.67 (1.44, 1.94) | 15.6          | 9.0           | 1.73 (1.42, 2.11) |
| <b>Well-child visits (without immunizations)</b> |               |               |                   |               |               |                   |               |               |                   |
| Overall                                          | 2.6           | 3.2           | 0.79 (0.72, 0.87) | 2.4           | 2.3           | 1.03 (0.86, 1.24) | 2.7           | 3.6           | 0.75 (0.72, 0.77) |
| March                                            | 2.1           | 3.5           | 0.58 (0.53, 0.64) | 2.5           | 2.4           | 1.03 (0.88, 1.21) | 2.2           | 3.7           | 0.58 (0.57, 0.59) |
| April                                            | 0.5           | 3.1           | 0.17 (0.16, 0.18) | 1.5           | 2.8           | 0.52 (0.44, 0.60) | 1.4           | 3.5           | 0.39 (0.38, 0.41) |
| May                                              | 2.0           | 3.1           | 0.64 (0.60, 0.69) | 2.0           | 2.2           | 0.90 (0.71, 1.14) | 2.4           | 3.6           | 0.68 (0.65, 0.71) |
| June                                             | 3.2           | 3.2           | 1.01 (0.96, 1.06) | 3.0           | 2.7           | 1.08 (0.82, 1.42) | 3.0           | 3.5           | 0.86 (0.84, 0.89) |
| July                                             | 3.8           | 4.1           | 0.93 (0.81, 1.07) | 3.5           | 2.3           | 1.48 (1.32, 1.67) | 3.5           | 3.7           | 0.94 (0.90, 0.98) |
| August                                           | 4.2           | 4.7           | 0.90 (0.79, 1.02) | 4.6           | 3.0           | 1.50 (1.34, 1.69) | 4.1           | 4.8           | 0.85 (0.81, 0.90) |

Appendix 1, as supplied by the authors. Appendix to: Saunders N, Guttman A, Brownell M, et al. Pediatric primary care in Ontario and Manitoba after the onset of the COVID-19 pandemic: a population-based study. *CMAJ Open* 2021. DOI:10.9778/cmajo.20210161. Copyright © 2021 The Author(s) or their employer(s). To receive this resource in an accessible format, please contact us at [cmajgroup.cmajca](mailto:cmajgroup.cmajca).

|                    |      |      |                   |      |      |                   |      |      |                   |
|--------------------|------|------|-------------------|------|------|-------------------|------|------|-------------------|
| September          | 3.0  | 3.3  | 0.91 (0.84, 0.99) | 1.5  | 2.2  | 0.68 (0.60, 0.78) | 3.0  | 3.9  | 0.76 (0.73, 0.79) |
| October            | 2.3  | 2.4  | 0.94 (0.85, 1.04) | 1.0  | 2.0  | 0.51 (0.46, 0.58) | 2.0  | 3.2  | 0.64 (0.63, 0.65) |
| November           | 1.7  | 2.4  | 0.69 (0.66, 0.72) | 1.6  | 1.8  | 0.93 (0.71, 1.22) | 2.1  | 3.1  | 0.68 (0.66, 0.70) |
| <b>Sick visits</b> |      |      |                   |      |      |                   |      |      |                   |
| Overall            | 22.6 | 27.5 | 0.82 (0.75, 0.90) | 29.8 | 32.7 | 0.91 (0.86, 0.97) | 27.9 | 34.8 | 0.80 (0.78, 0.83) |
| March              | 26.3 | 32.0 | 0.82 (0.80, 0.84) | 36.0 | 35.6 | 1.01 (0.95, 1.07) | 32.9 | 37.8 | 0.87 (0.86, 0.88) |
| April              | 15.2 | 29.7 | 0.51 (0.48, 0.55) | 24.7 | 36.2 | 0.68 (0.64, 0.73) | 22.3 | 37.4 | 0.60 (0.58, 0.62) |
| May                | 19.1 | 29.6 | 0.65 (0.60, 0.69) | 24.2 | 35.6 | 0.68 (0.64, 0.73) | 25.0 | 36.5 | 0.69 (0.66, 0.71) |
| June               | 22.3 | 25.8 | 0.86 (0.82, 0.91) | 30.5 | 30.3 | 1.01 (0.98, 1.04) | 25.9 | 33.6 | 0.77 (0.75, 0.80) |
| July               | 27.6 | 26.3 | 1.05 (0.92, 1.19) | 32.1 | 32.0 | 1.00 (0.97, 1.03) | 28.9 | 29.6 | 0.98 (0.96, 0.99) |
| August             | 26.9 | 26.6 | 1.01 (0.88, 1.16) | 31.2 | 32.3 | 0.97 (0.90, 1.04) | 29.6 | 30.2 | 0.98 (0.93, 1.03) |
| September          | 24.6 | 26.4 | 0.93 (0.84, 1.04) | 28.1 | 33.2 | 0.85 (0.78, 0.91) | 31.1 | 35.1 | 0.89 (0.84, 0.93) |
| October            | 21.3 | 25.0 | 0.85 (0.78, 0.93) | 32.7 | 29.8 | 1.10 (1.01, 1.20) | 28.4 | 34.9 | 0.81 (0.78, 0.85) |
| November           | 18.9 | 26.0 | 0.73 (0.69, 0.76) | 27.9 | 29.9 | 0.94 (0.89, 0.99) | 26.4 | 37.3 | 0.71 (0.69, 0.72) |

**Table S13. Virtual primary care visits among children and adolescents, in post-pandemic months, by equity lens** All values are the percent of observed visits in 2020 that were virtual and do not include newborns.

|           | Ontario              |                   |                  |                   |                    | Manitoba            |                   |                  |                   |                    |
|-----------|----------------------|-------------------|------------------|-------------------|--------------------|---------------------|-------------------|------------------|-------------------|--------------------|
|           | Age group            |                   |                  |                   |                    |                     |                   |                  |                   |                    |
|           | Newborns             | Age 29 - 365 days | Age 1 to 5 years | Age 6 to 12 years | Age 13 to 17 years | Newborns            | Age 29 - 365 days | Age 1 to 5 years | Age 6 to 12 years | Age 13 to 17 years |
| Overall   | 18.9                 | 35.7              | 44.7             | 58.3              | 64.0               | 15.4                | 25.0              | 27.0             | 31.6              | 33.2               |
| March     | 25.6                 | 26.2              | 29.9             | 33.4              | 37.8               | 26.8                | 26.4              | 20.0             | 30.5              | 32.5               |
| April     | 25.7                 | 51.3              | 67.5             | 88.0              | 89.2               | 21.5                | 40.1              | 52.5             | 58.0              | 55.5               |
| May       | 20.8                 | 46.2              | 60.5             | 82.2              | 84.0               | 15.9                | 30.1              | 38.0             | 45.4              | 44.3               |
| June      | 17.8                 | 40.2              | 54.1             | 71.9              | 74.9               | 11.0                | 24.0              | 27.4             | 30.7              | 31.8               |
| July      | 15.5                 | 35.5              | 48.5             | 64.1              | 68.2               | 12.8                | 19.7              | 24.1             | 25.3              | 26.5               |
| August    | 15.0                 | 31.7              | 43.5             | 58.1              | 62.0               | 12.0                | 20.4              | 24.9             | 27.8              | 27.7               |
| September | 15.3                 | 31.2              | 48.7             | 62.3              | 64.6               | 12.6                | 20.1              | 26.8             | 30.8              | 29.0               |
| October   | 15.8                 | 30.2              | 35.8             | 49.8              | 57.7               | 13.7                | 20.8              | 21.2             | 24.7              | 28.2               |
| November  |                      | 29.6              | 32.3             | 44.2              | 55.0               | 17.0                | 23.5              | 20.5             | 24.8              | 32.1               |
|           | Material deprivation |                   |                  |                   |                    |                     |                   |                  |                   |                    |
|           | Q1 (least deprived)  | Q2                | Q3               | Q4                | Q5 (most deprived) | Q1 (least deprived) | Q2                | Q3               | Q4                | Q5 (most deprived) |
| Overall   | 54.6                 | 53.6              | 53.1             | 51.4              | 50.1               | 27.9                | 29.3              | 30.0             | 30.3              | 32.0               |
| March     | 34.5                 | 33.3              | 32.8             | 31.2              | 30.0               | 24.0                | 32.0              | 29.5             | 28.3              | 25.6               |
| April     | 77.6                 | 76.4              | 76.0             | 73.4              | 73.1               | 57.0                | 54.0              | 52.6             | 51.9              | 49.0               |
| May       | 72.6                 | 71.4              | 70.0             | 67.8              | 66.5               | 41.6                | 42.0              | 39.6             | 40.3              | 40.2               |
| June      | 65.5                 | 63.8              | 62.8             | 60.4              | 58.4               | 28.6                | 28.6              | 28.9             | 29.4              | 30.0               |
| July      | 59.4                 | 57.8              | 57.1             | 54.6              | 52.0               | 23.6                | 24.2              | 24.3             | 24.5              | 26.1               |
| August    | 54.5                 | 52.9              | 51.8             | 49.4              | 47.5               | 23.9                | 24.8              | 26.1             | 26.8              | 28.9               |
| September | 58.4                 | 56.2              | 54.8             | 52.5              | 50.3               | 26.8                | 26.9              | 28.2             | 27.6              | 29.7               |
| October   | 45.6                 | 45.9              | 46.6             | 45.8              | 45.0               | 20.2                | 21.7              | 25.0             | 25.4              | 29.8               |
| November  | 41.5                 | 41.8              | 42.9             | 42.7              | 42.9               | 20.5                | 21.8              | 25.0             | 26.6              | 34.0               |
|           | Immigrant status     |                   |                  |                   |                    |                     |                   |                  |                   |                    |
|           | Immigrants           | Refugees          | Canadian born    | Immigrants        | Refugees           | Canadian born       | Immigrants        | Refugees         | Canadian born     |                    |
| Overall   | 61.2                 | 49.5              | 52.7             | 27.7              | 22.1               | 31.5                | 27.7              | 22.1             | 31.5              |                    |
| March     | 32.1                 | 25.5              | 32.9             | 24.9              | 23.3               | 23.4                | 24.9              | 23.3             | 23.4              |                    |
| April     | 88.7                 | 79.7              | 75.0             | 57.6              | 42.6               | 57.5                | 57.6              | 42.6             | 57.5              |                    |
| May       | 82.5                 | 72.4              | 69.6             | 41.6              | 27.6               | 45.2                | 41.6              | 27.6             | 45.2              |                    |
| June      | 73.3                 | 60.7              | 62.2             | 28.6              | 17.3               | 31.5                | 28.6              | 17.3             | 31.5              |                    |
| July      | 66.9                 | 54.6              | 56.3             | 22.5              | 16.6               | 26.5                | 22.5              | 16.6             | 26.5              |                    |
| August    | 61.2                 | 48.8              | 51.4             | 23.9              | 14.8               | 28.1                | 23.9              | 14.8             | 28.1              |                    |
| September | 63.9                 | 50.0              | 54.7             | 26.9              | 21.7               | 30.3                | 26.9              | 21.7             | 30.3              |                    |
| October   | 53.6                 | 41.6              | 45.7             | 20.7              | 21.8               | 26.0                | 20.7              | 21.8             | 26.0              |                    |
| November  | 52.6                 | 41.7              | 42.0             | 21.9              | 21.6               | 27.0                | 21.9              | 21.6             | 27.0              |                    |
|           | Rurality             |                   |                  |                   |                    |                     |                   |                  |                   |                    |
|           | Urban                | Rural             | Urban            | Rural             | Urban              | Rural               |                   |                  |                   |                    |
| Overall   | 53.0                 | 49.7              | 28.0             | 34.9              | 28.0               | 34.9                |                   |                  |                   |                    |
| March     | 32.4                 | 34.9              | 21.6             | 31.2              | 21.6               | 31.2                |                   |                  |                   |                    |
| April     | 75.7                 | 73.1              | 52.7             | 53.1              | 52.7               | 53.1                |                   |                  |                   |                    |
| May       | 70.2                 | 66.4              | 40.2             | 42.8              | 40.2               | 42.8                |                   |                  |                   |                    |
| June      | 62.8                 | 57.8              | 28.0             | 33.0              | 28.0               | 33.0                |                   |                  |                   |                    |
| July      | 56.8                 | 51.6              | 23.4             | 29.0              | 23.4               | 29.0                |                   |                  |                   |                    |
| August    | 51.9                 | 46.1              | 24.5             | 32.1              | 24.5               | 32.1                |                   |                  |                   |                    |
| September | 55.1                 | 49.6              | 26.6             | 32.5              | 26.6               | 32.5                |                   |                  |                   |                    |
| October   | 45.9                 | 43.4              | 22.5             | 31.8              | 22.5               | 31.8                |                   |                  |                   |                    |
| November  | 42.5                 | 37.2              | 23.1             | 34.6              | 23.1               | 34.6                |                   |                  |                   |                    |

Appendix 1, as supplied by the authors. Appendix to: Saunders N, Guttman A, Brownell M, et al. Pediatric primary care in Ontario and Manitoba after the onset of the COVID-19 pandemic: a population-based study. *CMAJ Open* 2021. DOI:10.9778/cmajo.20210161. Copyright © 2021 The Author(s) or their employer(s). To receive this resource in an accessible format, please contact us at [cmajgroup.cmajca](mailto:cmajgroup.cmajca).

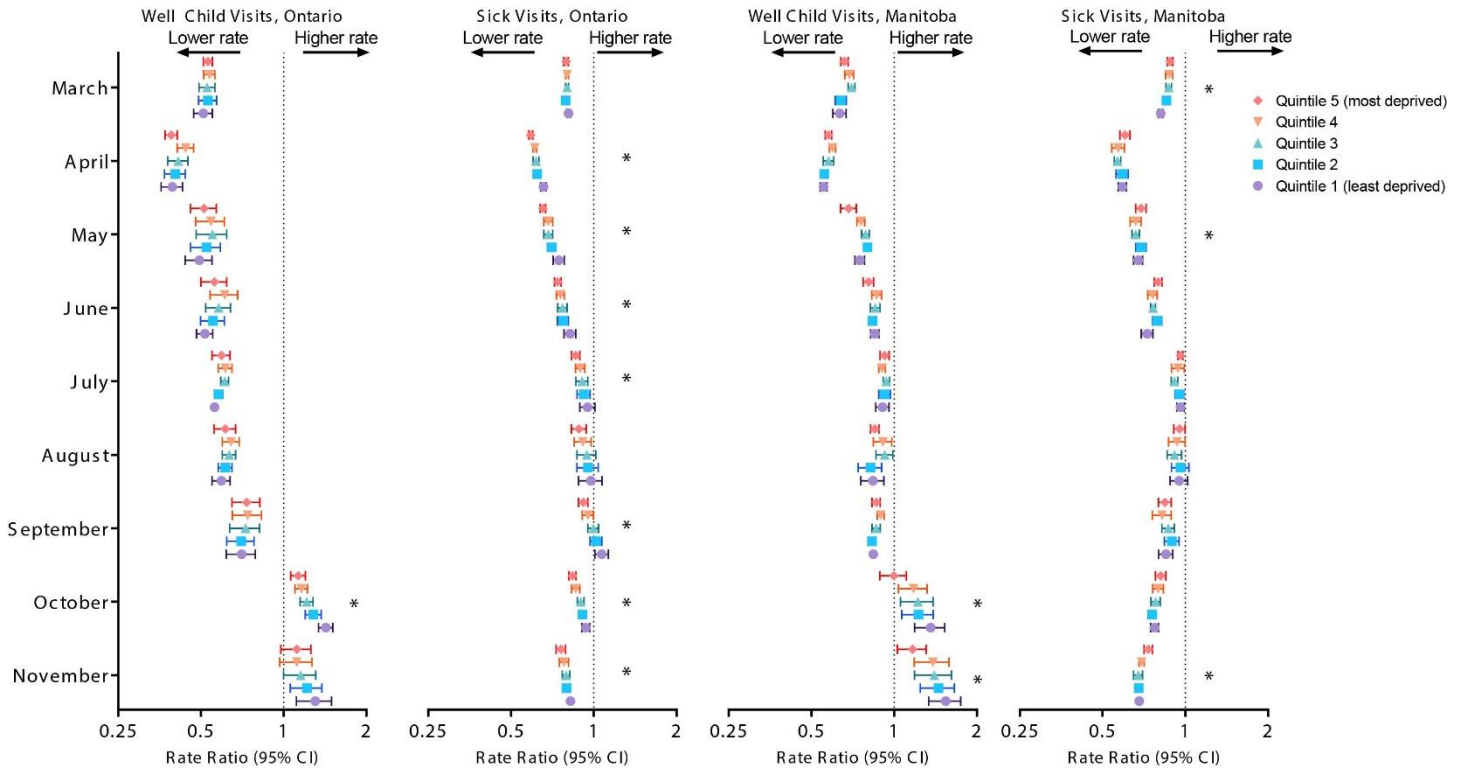

Figure S1. Adjusted rate ratio of monthly well-child and sick visits in Ontario and Manitoba following the onset of the COVID-19 pandemic by material deprivation quintile. Asterisk indicates significant differences from Quintile 1 to Quintile 5 within each month.

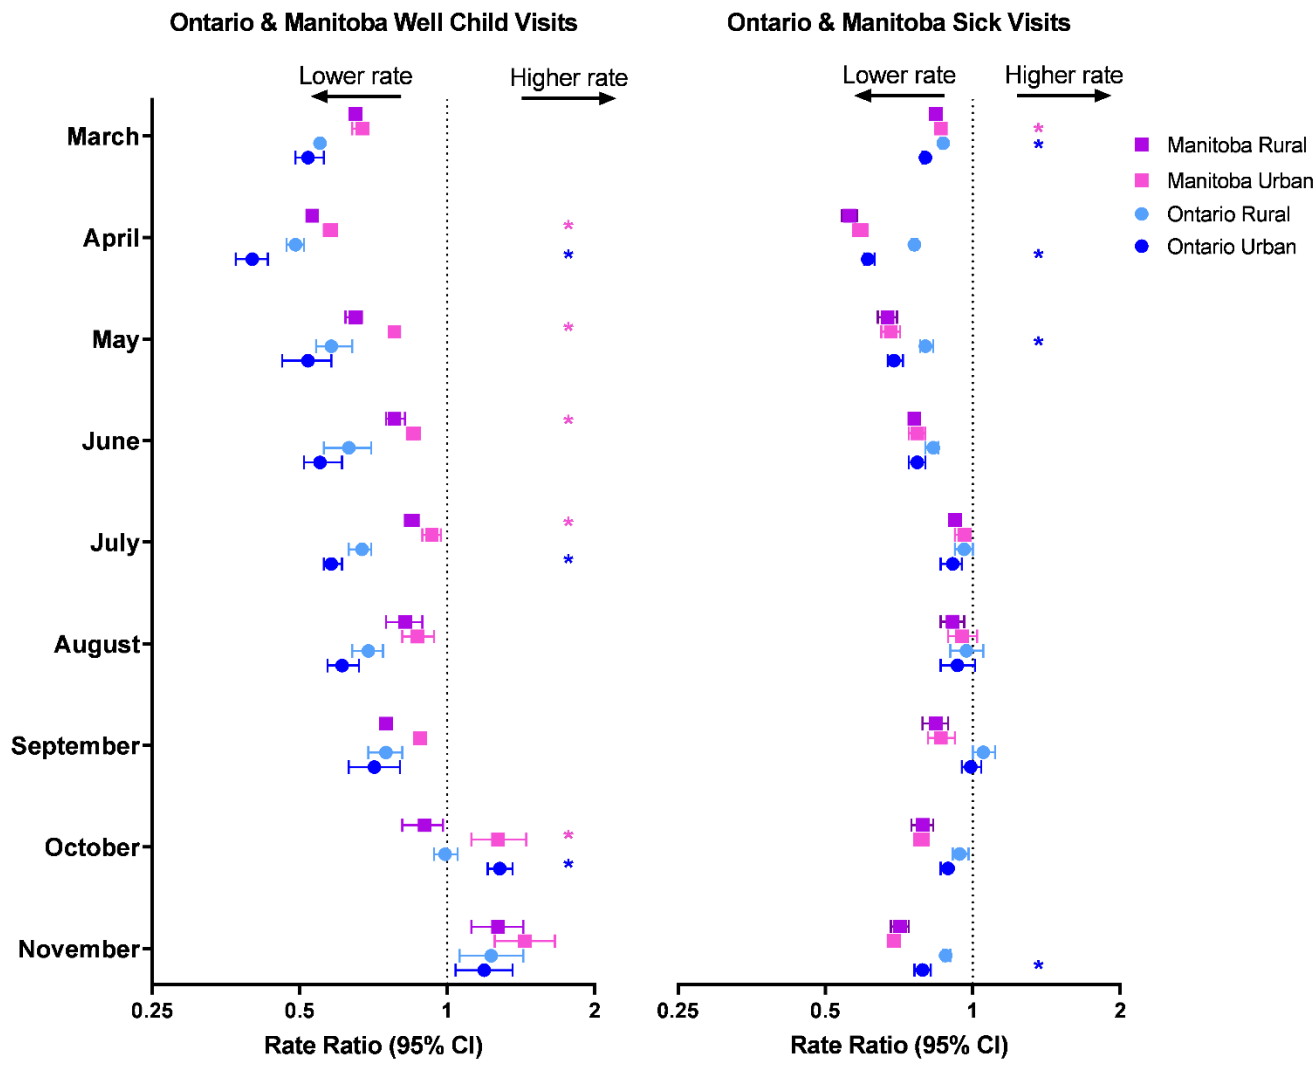

Figure S2. Adjusted rate ratio of monthly well child and sick visits in Ontario and Manitoba following the onset of the COVID-19 pandemic by rurality. Asterisk indicates significant differences from urban within each month and province.



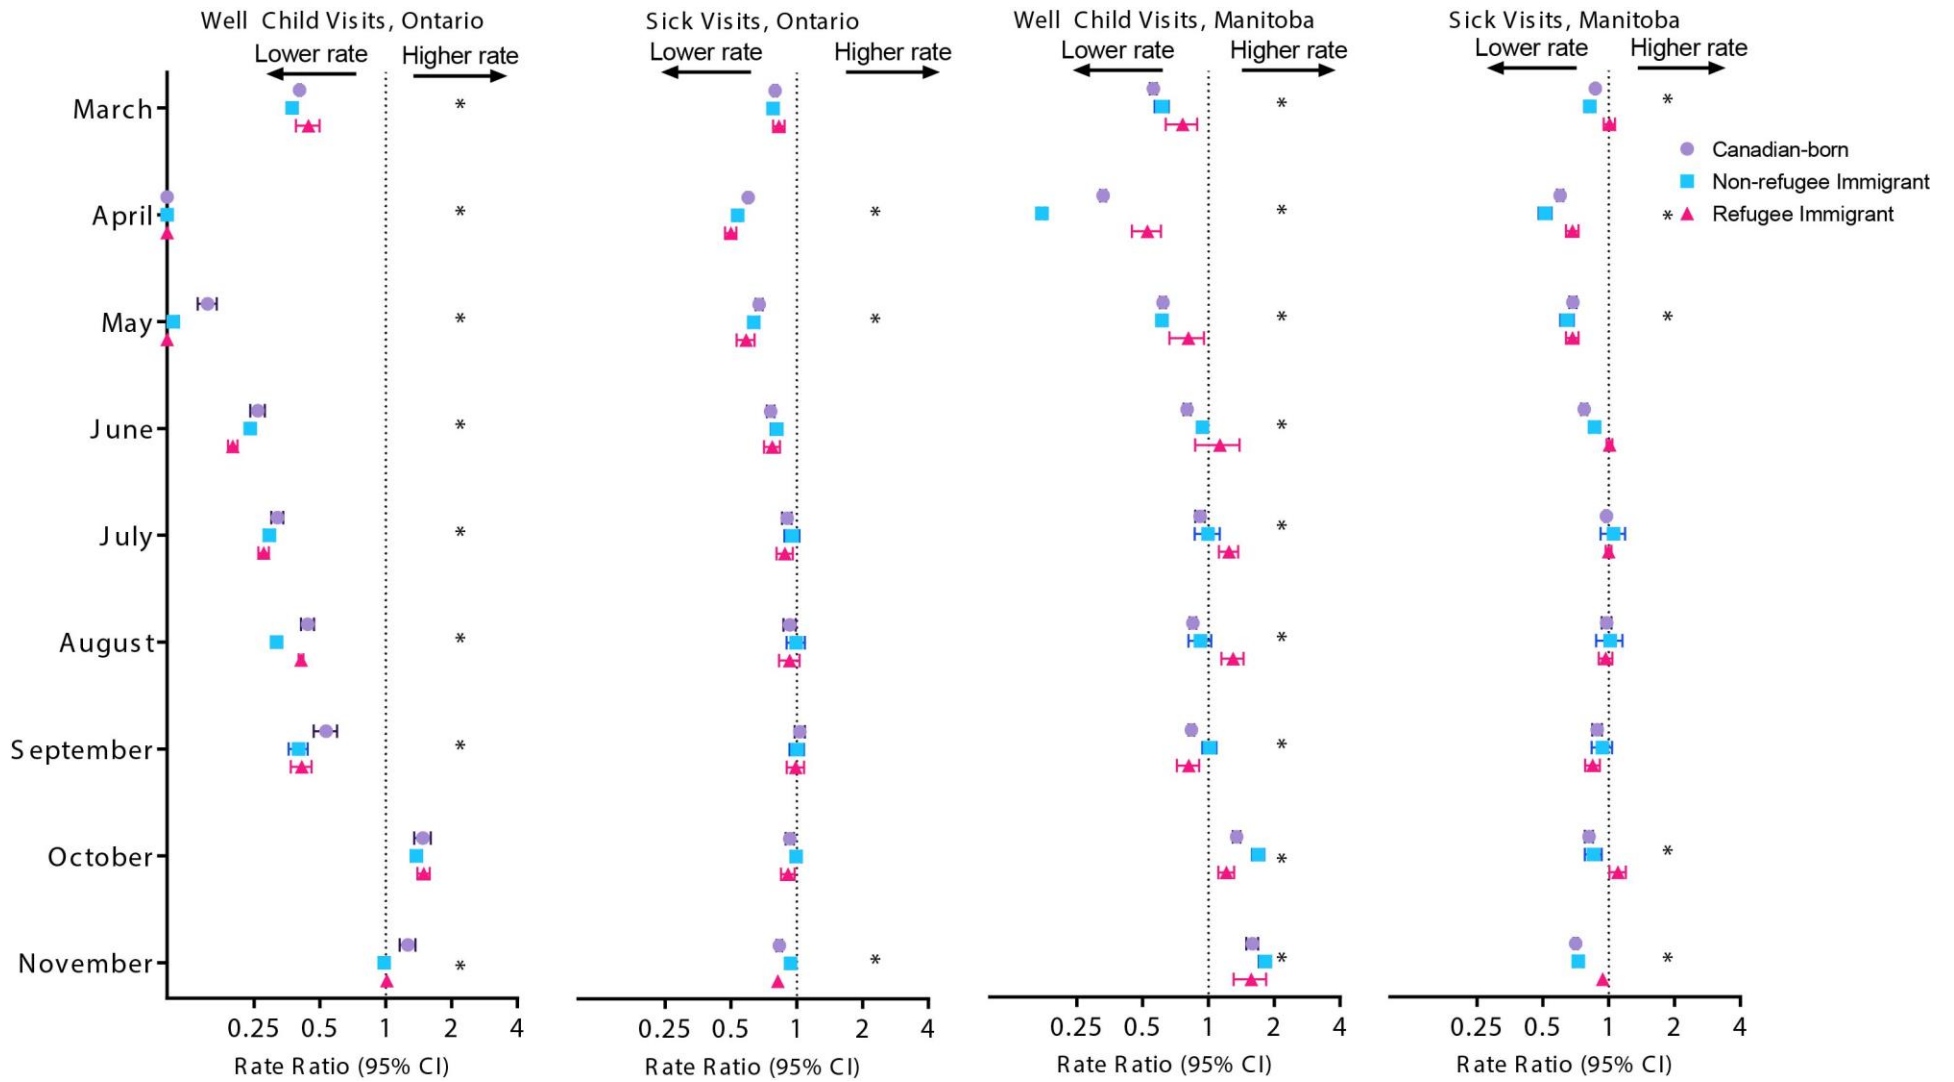

Figure S3. Adjusted rate ratio of monthly well-child and sick visits in Ontario and Manitoba following the onset of the COVID-19 pandemic by immigrant status. Asterisk indicates significant differences Canadian-born within each month.
