# Supplementary material for: Pediatric primary care in Ontario and Manitoba after the onset of the COVID-19 pandemic: a population-based study
Source: PubMed Central journal article supplement — CMAJ Open. 2021 Dec 14;9(4):E1149–58. doi: 10.9778/cmajo.20210161 (PMC8687490; doi:10.9778/cmajo.20210161), 2021-12-14
Supplement: open-2021-0161-original-submission.pdf [file open-2021-0161-original-submission.pdf]

**Working Title:** Pediatric primary care in Canada through the COVID-19 pandemic: a population-based study.

**Authors:** Natasha Saunders<sup>1-7</sup>, Astrid Guttmann<sup>1-7</sup>, Marni Brownell<sup>8-10</sup>, Eyal Cohen<sup>1-7</sup>, Longdi Fu<sup>3</sup>, Jun Guan<sup>3</sup>, Joykrishna Sarkar<sup>9</sup>, Alyson Mahar<sup>8,9</sup>, Sima Gandhi<sup>3</sup>, Lisa Fiksenbaum<sup>4</sup>, Alan Katz<sup>8,9,11</sup>, Therese A Stukel<sup>3,5</sup>

**Affiliations:** <sup>1</sup>The Hospital for Sick Children, Toronto, Canada; <sup>2</sup>Department of Pediatrics, University of Toronto, Toronto, Canada; <sup>3</sup>ICES, Toronto, Canada; <sup>4</sup>Child Health Evaluative Sciences, SickKids Research Institute, Toronto, Canada, <sup>5</sup>Institute of Health Policy, Management and Evaluation, The University of Toronto, Toronto, Canada, <sup>6</sup>Temerty, <sup>7</sup>Edwin S.H. Leong Centre for Healthy Children, University of Toronto, Toronto, Canada <sup>8</sup>Department of Community Health Sciences, University of Manitoba, Winnipeg, Canada, <sup>9</sup>Manitoba Centre for Health Policy, Winnipeg, Manitoba, <sup>10</sup>Children's Hospital Research Institute of Manitoba, Winnipeg, Manitoba <sup>11</sup>Department of Family Medicine University of Manitoba, Winnipeg, Manitoba.

**Corresponding Author:** Natasha Saunders, The Hospital for Sick Children, 555 University Avenue, Toronto, Ontario, M5G 1X8. [Natasha.saunders@sickkids.ca](mailto:Natasha.saunders@sickkids.ca). (t) 416-813-7654 x203076, (f) 416-813-5663.

**Short title:** Pediatric Primary Care Access During Covid-19

**Keywords:** Primary care, children, pediatrics, immunizations, well-child visits, virtual care, COVID-19, pandemic

**Word Count:** 2499

**Contributors Statement:** N. Saunders conceptualized and designed the study, interpreted the results, drafted the initial manuscript, and revised the manuscript. T. Stukel, A. Guttmann, E. Cohen and M. Brownell conceptualized and designed the study, interpreted the results, and revised the manuscript. S. Gandhi, A. Mahar, and A. Katz interpreted the results and revised the manuscript. L. Fu, J. Guan and J. Sarkar had access to and analyzed the data, interpreted the results, and revised the manuscript. All authors reviewed and approved the final manuscript as submitted and agree to be accountable for all aspects of the work.

**Conflict of Interest:** None declared.

**Financial Support:** This study was supported by ICES, which is funded by an annual grant from the Ontario Ministry of Health (MOH). This study was also supported by the Canadian Institutes of Health Research Grant #VR4--172730 awarded to Drs. Guttmann, Saunders, Cohen, and Brownell. The opinions, results and conclusions reported in this paper are those of the authors and are independent from the funding sources. No endorsement by ICES or the Ontario MOH is intended or should be inferred. Parts of this material are based on data and information compiled and provided by the Canadian Institute for Health Information (CIHI) and Immigration, Refugees Citizenship Canada (IRCC). However, the analyses, conclusions, opinions and statements expressed herein are those of the authors, and not necessarily those of CIHI or IRCC. The authors acknowledge the Manitoba Centre for Health Policy (MCHP) for use of data contained in the Manitoba Population Research Data Repository under project

1  
2  
3 (HIPC#2020/2021-34). The results and conclusions are those of the authors and no official  
4 endorsement by MCHP, Manitoba Health, or other data providers is intended or should be  
5 inferred. Manitoba data used in this study were derived from data provided by Manitoba Health  
6 and IRCC.  
7

8  
9 **Data sharing:** The data sets from this study are held securely in coded form at a) ICES and b)  
10 the Manitoba Centre for Health Policy (MCHP). Data-sharing agreements prohibit ICES and  
11 MCHP from making the data sets publicly available, but access may be granted to those who  
12 meet pre-specified criteria for confidential access, available at [www.ices.on.ca/DAS](http://www.ices.on.ca/DAS) and  
13 [https://www.umanitoba.ca/faculties/health\\_sciences/medicine/units/chs/departmental\\_units/mchp](https://www.umanitoba.ca/faculties/health_sciences/medicine/units/chs/departmental_units/mchp/resources/access.html)  
14 [/resources/access.html](https://www.umanitoba.ca/faculties/health_sciences/medicine/units/chs/departmental_units/mchp/resources/access.html). The full data set creation plan and underlying analytic code are available  
15 from the authors upon request, understanding that the programs may rely upon coding templates  
16 or macros that are unique to ICES and MCHP.  
17  
18

19 **Abbreviations:** CI, confidence interval; CIHI DAD, Canadian Institutes of Health Information  
20 Discharge Abstract Database; ICD-10-CA, International Classification of Diseases 10<sup>th</sup> Revision;  
21 IRCC, Immigration, Refugees and Citizenship Canada; OHIP, Ontario Health Insurance Plan;  
22 aRR, adjusted relative rate; Registered Persons Database, RPDB  
23  
24  
25  
26  
27  
28  
29  
30  
31  
32  
33  
34  
35  
36  
37  
38  
39  
40  
41  
42  
43  
44  
45  
46  
47  
48  
49  
50  
51  
52  
53  
54  
55  
56  
57  
58  
59  
60

## Abstract

**Background:** Disruptions to health services following the onset of the COVID-19 pandemic were large. The extent to which changes to service delivery and access affected essential primary care for children is unknown. We describe pandemic-related changes in primary care for children overall and by equity strata.

**Methods:** We performed a population-based study in Ontario and Manitoba before and during the COVID-19 pandemic (January 1<sup>st</sup>, 2017 to November 28<sup>th</sup>, 2020). We calculated the weekly rates of primary care visits for well-child and sick visits, in-person and virtually, overall and by age group, neighbourhood level material deprivation, rurality, and immigration status, and assessed changes in visit rates post-restrictions compared to expected rates based on 3-year pre-Covid baseline rates.

**Results:** Among almost 3 million Ontario and over 300,000 Manitoba children, primary care visit rates declined to 0.80 (95%CI 0.77-0.82) [Ontario] and 0.82 (0.79-0.84) [Manitoba] of expected in the nine months following the onset of the pandemic. Virtual visits made up 53% and 29% in Ontario and Manitoba, respectively. The largest monthly drops occurred in April 2020 but neither province reached pre-restriction levels by November 2020. Children 1-12 years experienced the greatest drop in visits, especially for well-child care. Compared to pre-pandemic levels, visit rates were lowest among rural Manitobans, urban Ontarians and Ontarians living in low-income neighbourhoods.

**Interpretation:** Disruptions contributed to large, rapid decreases in primary care with a substantial shift to virtual care. Post-pandemic planning must consider the need for catch up visits. The long-term impacts on child health warrant further study.

## Introduction

Primary care is essential to maintaining the health of individuals and populations, and the functioning of a health system. For children in particular, primary care is the cornerstone for monitoring growth and development, providing anticipatory guidance, and delivering immunizations for vaccine preventable diseases. A good primary care system is associated with more equitable health in populations.<sup>1,2</sup> Delays in or failure to access regular and timely primary care can lead to service gaps during a period of critical development for children and can further widen health inequities.

In March 2020, the COVID-19 pandemic was declared. Many primary care provider offices closed or functioned at reduced capacity alongside broader societal shutdowns including nonurgent healthcare. Care providers reported difficulty keeping offices open due to multiple factors including lack of personal protective equipment and fear of infection.<sup>3</sup> To mitigate the challenges to providing care imposed by the shut down and facilitate and maintain isolation, the Ontario and Manitoba Ministries of Health introduced new virtual care fee codes.<sup>4</sup> Virtual care is a well-established modality for care delivery, especially for mental health, and its integration into pediatric primary care for those with a medical home is supported by the American Academy of Pediatrics.<sup>5</sup> For children, however, where growth monitoring, vision screening, and immunizations require in-person visits, virtual care may only partially substitute needed care. Virtual care may not be optimal for families with lack of access to reliable internet and/or phone or lower virtual health care literacy, and may contribute to inequities in access to and/or quality of care. Reduction in pediatric primary care (both virtual and in-person) as a consequence of non-pharmacological interventions and imposed restrictions to reduce SARS-CoV-2 infections may lead to lasting health and social consequences for children and their families.

We aimed to understand the extent to which volume and type (well-child vs. sick visits) of primary care for children and adolescents in two large Canadian provinces, with different patterns of SARS-CoV2 circulation and restrictions, changed through the COVID-19 pandemic and measure whether this shift exacerbated inequities in care delivery. Specifically, our objectives were to examine rates of pediatric primary care visits for well-child and sick visits, in-person and virtually, before and during the COVID-19 pandemic in Ontario and Manitoba, and to explore the association of socio-demographic factors with use of primary care during the pandemic.

## Methods

### *Study design, setting, and population*

We conducted a population-based, repeated cross-sectional study of all children and adolescents in Ontario and Manitoba, between January 1, 2017 and November 28<sup>th</sup>, 2020 using linked health and administrative datasets. We excluded children and youth not residing in Ontario or Manitoba on January 1<sup>st</sup> of each year and those who were ineligible for provincial health insurance coverage within 90 days of January 1<sup>st</sup>. Newborns (<29 days) were included as a rolling cohort and were excluded if they were not residing in Ontario or Manitoba or ineligible for provincial health insurance at birth, and those with <28-day follow-up at the end of the accrual period.

### *Data sources*

We used health and demographic databases housed and linked at ICES (Ontario) and at the Manitoba Centre for Health Policy (Manitoba). Individual level records were linked using unique encoded identifiers derived from the health care numbers of individuals eligible for provincial health insurance coverage. We used demographic information (date of birth, sex, and postal code) from provincial health insurance registries (Ontario's Registered Persons Database, Manitoba Health Insurance Registry) and physician billings databases (Ontario Health Insurance Plan; Manitoba Medical Services) to ascertain outpatient physician visits to family physicians and paediatricians for primary care, both in-person and virtually (eTable 12. Appendix A).

Equity strata of interest included neighbourhood level material deprivation quintile from the Ontario Marginalization Index<sup>6</sup> and from the CanMarg Index for Manitoba,<sup>7</sup> rural (community size <10,000) and urban residence based on the 2016 Canadian Census, and the child's immigrant status (refugee or nonrefugee immigrant) based on presence of a record in the provincial portions of Immigration, Refugees and Citizenship Canada's (IRCC) Permanent Resident Dataset. This latter dataset includes demographic information on all individuals who landed in respective provinces from January 1, 1985 to May 31, 2017 (Ontario) and to December 31, 2017 (Manitoba). Linkage of IRCC to population registries has been conducted and validated in each province with linkage rate of 86% in Ontario and 96.2% in Manitoba.<sup>8,9</sup> Those whose date of their eligibility for provincial health insurance coverage in Ontario was after May 31, 2017 or Manitoba after December 31, 2017 were not included in immigrant and refugee analyses as they may represent interprovincial migrants. Immigrant analyses excluded all children under 3 years due to data availability.

### *Analyses*

Ontario and Manitoba analyses were conducted separately. Our main outcome measures included overall primary care visit rates (virtual and in-person) to a paediatrician or family physician/general practitioner (eTable 12. Appendix A). Visits were further examined by type including well-child (periodic health visits with or without immunizations) and sick visits (all other non-well-child physician visits).

Visit rates were expressed as total visits per 1000 population, computed overall and by subgroups of age (<28 days, 29 to 365 days, 1 to 5 years, 6 to 12 years, and 13 to 17 years), rurality, immigrant status and deprivation quintile, and were annualized (eTable 2). Individual newborns were followed for 28 days post-birth. For non-newborns, we aggregated daily visit counts to strata of age group, sex and week, and used the corresponding population on January 1<sup>st</sup> of each year as the denominator for rates as it did not change significantly over the year (eTable 1).

The exposure was the COVID-19 restrictions period, defined as March 1<sup>st</sup> to November 30<sup>th</sup> 2020. We used Poisson GEE models for clustered count data to model pre-Covid trends and used these to predict expected post-Covid trends in the absence of restrictions. The unit of analysis was the age group-sex-week stratum. The dependent variable was the count of events to the population in the stratum; the offset was *log* of the stratum-specific population; the working correlation structure was AR(1). The pre-Covid model included age group-sex indicators, a

1  
2  
3 linear term of weeks since January 1 2017 to estimate the general trend in visit rates through  
4 March 1 2020, and pre-Covid month indicators to model seasonal variations, with April as the  
5 reference month.  
6

7  
8 We computed the expected post-Covid visit rates (and confidence intervals) by applying the  
9 linear combination of pre-Covid regression coefficients to the post-Covid age-sex-month strata  
10 and exponentiating. The relative change in post-Covid visit rates was expressed as the ratio of  
11 observed to expected rates by exponentiating the difference of observed and expected post-Covid  
12 *log* rates and confidence intervals. Newborn models used Poisson regression with individual  
13 newborn as the unit of analysis and similar model terms but without an auto-regressive  
14 correlation term.  
15

16  
17 Statistical analyses were conducted with SAS statistical software, version 9.4. The Research  
18 Ethics Board at The Hospital for Sick Children and the Health Research Ethics Board at the  
19 University of Manitoba approved this study.  
20

## 21 **Results**

22  
23 Characteristics of Ontario (almost 3 million) and Manitoba (over 300,000) children eligible for  
24 provincial health care in 2017, 2018, 2019 and 2020 are in eTable 1. During the pre-Covid  
25 period, annualized visit rates were 49.5 (Ontario) and 46.7 visits (Manitoba) per 1000 population  
26 overall, 12.2 (Ontario) and 11.2 (Manitoba) per 1000 population for well-child visits, and 37.4  
27 (Ontario) and 36.5 (Manitoba) per 1000 population for sick visits (Figure 1, eTable 2).  
28

29  
30 In the nine months following the onset of the pandemic, primary care visit rates decreased  
31 overall; rates were 0.80 (95% CI 0.77, 0.82, Ontario) and 0.82 (95% CI 0.79, 0.84, Manitoba) of  
32 expected (Figure 1, eTable 2). 53% (Ontario); 29% (Manitoba) of these visits were delivered  
33 virtually. Rates reached a nadir in April 2020 before slowly increasing and peaking in November  
34 2020. In Ontario, the extent of the decline was greater for well-child visits (aRR 0.73, 95% CI  
35 0.66, 0.80) than for sick visits (aRR 0.82, 95% CI 0.78, 0.85) whereas the opposite was observed  
36 in Manitoba (well-child visits aRR 0.93 95% CI 0.87, 1.00; sick visits aRR 0.78, 95% CI 0.75,  
37 0.81).  
38

39  
40 Except for newborns, in whom well-child visits decreased and sick visits increased above  
41 expected levels (Figure 2, eTables 3 and 4), all Ontario age groups experienced a sharp  
42 immediate decrease in well-child visits with some recovery by November 2020. For sick visits in  
43 infants 29 to 365 days, visit rates were at or above expected levels whereas for all children 1 year  
44 and older, they were well below expected (eTable 3). In Manitoba, newborn well-child visits  
45 were similar to expected but there was a marked increase in sick visits (eTable 4). As in Ontario,  
46 Manitoba children  $\geq 1$  year had lower than expected rates of both well-child and sick visits with  
47 some return towards baseline for well-child visits in the latter study period.  
48

49  
50 We found a small gradient in observed versus expected visit rates by neighbourhood material  
51 deprivation quintile. Those in the most deprived quintile had the lowest relative visit rates  
52 compared to expected in Ontario but not Manitoba (Figure 3, eTables 5 and 6). Uptake of virtual  
53  
54  
55  
56  
57  
58  
59  
60

1  
2  
3 care was lowest in the most deprived quintile for Ontario but not Manitoba (Ontario: quintile 1  
4 54.6% vs. quintile 5 50.1%; Manitoba quintile 1 27.9% vs. quintile 5 32.0%). (eTable 11)  
5

6 The largest drops in adjusted relative rates in overall primary care visits were observed in urban  
7 (vs. rural) Ontarians (aRR 0.79, 95% CI 0.77, 0.82) and rural (vs. urban) Manitobans (aRR 0.78,  
8 95% CI 0.75, 0.80) and these declines were most pronounced for urban sick visits in Ontario and  
9 rural well-child visits in Manitoba (Figure 4, eTable 7 and 8).  
10

11 Refugees and immigrants to Manitoba had similar rates of well-child visits compared to  
12 Canadian-born children, with visit rates at or near expected. (Figure 5, eTables 9 and 10). Sick  
13 visits were lower than expected in these groups with Canadian-born experiencing a greater  
14 relative drop than refugees. (refugees: aRR 0.91, 95% CI 0.86, 0.97; nonrefugee immigrants aRR  
15 0.82, 95% CI 0.75, 0.90; Canadian-born aRR 0.80, 95% CI 0.78, 0.83). In contrast to Manitoba,  
16 Ontario well-child visits were well below expected across all groups with lowest rates observed  
17 among nonrefugee immigrants (aRR 0.54, 95% CI 0.51, 0.58). Sick visits were equally low  
18 across groups by immigrant status. Virtual care was lowest among refugees in Ontario (49.5%  
19 of visits) and highest in Canadian-born (60.3% of visits). In Manitoba, uptake of virtual care was  
20 generally much lower than Ontario with similar rates across immigrant groups (eTable 11).  
21  
22  
23  
24

## 25 Interpretation

26  
27 In this population-based study of children and adolescents in two Canadian provinces we found a  
28 large rapid drop in primary care utilization in the first nine months following the onset of the  
29 COVID-19 pandemic. Much of primary care for children was delivered virtually, especially in  
30 Ontario, and essential well-child visits for immunizations, growth, and developmental  
31 surveillance occurred at about three-quarters the rate of previous years. Importantly, we report  
32 disparities in the extent of shifts in primary care in Ontario but not in Manitoba, with a  
33 disproportionate reduction in essential care for children and adolescents from immigrant and  
34 refugee families, and low socioeconomic status and urban neighbourhoods. While delays and  
35 reductions in primary care were expected given the large disruptions to service delivery, the drop  
36 in primary care delivery for children persisted through the first nine months of the pandemic  
37 including during periods when little virus was circulating, personal protective equipment and  
38 infection control measures were more available, and only then started to recover towards  
39 baseline levels.  
40  
41  
42

43 In Ontario across all ages, Glazier et al.<sup>10</sup> reported a 28% decrease in primary care visits in the  
44 first few months following pandemic onset with more pronounced effects among children. We  
45 too show a rapid drop in observed visits rates in both Ontario and Manitoba but the extent of  
46 change, especially for well-child care, was less in Manitoba. Lower SARS-CoV-2 disease  
47 activity in Manitoba may explain this finding.<sup>11</sup> In both provinces, the use of virtual care did not  
48 continue at the same proportion in the later compared to early months of the pandemic. At what  
49 levels virtual care will be sustained, and the longer-term impact on child health, access to and  
50 quality of care of this widespread shift to virtual care remains to be determined. More transient  
51 visit declines have been described elsewhere. In Chicago, well-child and immunization visits  
52 dropped to half of pre-pandemic levels and returned to greater than 90% of the prior year within  
53  
54  
55  
56  
57  
58  
59  
60

1  
2  
3 eight weeks.<sup>12</sup> In South Africa, children had a rapid drop in primary care followed by a rapid  
4 return to baseline within three months.<sup>13</sup> In jurisdictions where telemedicine remuneration did  
5 not match that of in-person visits (e.g., Chicago), virtual care uptake was low (<10%).<sup>12</sup> It is  
6 possible that in Ontario and Manitoba, adequate remuneration for virtual care may have  
7 facilitated access to care for some families<sup>14</sup> and the observed interprovincial differences may  
8 have been fueled by the volume of circulating virus (and consequent restrictions) within each  
9 province. In parallel to these observed changes in primary care, there was a substantial shift in  
10 caregiver and family health-seeking behaviour for acute care and after-hours ambulatory care in  
11 Canada and elsewhere.<sup>2,15,16</sup> Despite these changes in health-care utilization, there has been no  
12 reported change in clinical severity or increase in severe harm.<sup>2</sup>  
13  
14  
15

16 While others have documented the rapid decline in both primary and acute care utilization at the  
17 onset of the pandemic, few have reported on socio-economic and demographic disparities of  
18 observed changes. The COVID-19 pandemic has magnified structural factors underpinning  
19 global health inequities<sup>17-19</sup> and our findings show that, at least in Ontario but less so in  
20 Manitoba, primary care for children may have also been affected. Others have shown that white  
21 non-Hispanic children in the US were more likely to have a preventive or telemedicine visit than  
22 other racial groups.<sup>20</sup> Our findings of particularly low visit rates in Ontario for well-child visits  
23 among those from more materially deprived neighbourhoods may be explained by amplification  
24 of challenges accessing and navigating the health system, virtual care literacy and access, and  
25 heightened fear of seeking care driven by high levels of infection in these communities.<sup>21-23</sup>  
26 Equitable primary care utilization observed in Manitoba may be related to more centralized  
27 pediatric primary care delivery through hospital-based clinics that serve large proportions of  
28 urban, refugee, and low-income children.<sup>24</sup> It is unclear the role providers had in contributing to  
29 these shifts in primary care delivery including from a lack of personal protective equipment,  
30 workforce redeployment, capacity for virtual care delivery, and practice jurisdiction.  
31  
32  
33  
34  
35

### 36 *Limitations*

37 This study has strengths of complete population coverage spanning the first nine months  
38 following the onset of the pandemic across two Canadian provinces with different Sars-CoV-2  
39 disease activity. Our study, however, is not without limitations. Virtual care codes did not allow  
40 us to differentiate telephone and video visits, the latter of which may be better suited to clinical  
41 assessment of children. We did not have individual measures of socio-demographics or family  
42 composition, though neighbourhood level measures have been shown to have important  
43 associations with health outcomes.<sup>25</sup> We did not assess provider level characteristics which may  
44 be important to understand drivers of inequities and reduced care access during the pandemic.  
45 Salaried physician and some non-physician care (< 1% of population)<sup>26</sup> including from  
46 community health centres, nurse practitioners and social workers, was not included due to data  
47 availability but such providers disproportionately care for more marginalized populations.<sup>26</sup>  
48  
49  
50  
51

### 52 *Conclusions*

53 We report the extent to which pediatric primary care delivery through the first nine months of the  
54 COVID-19 pandemic declined and how this varied by important equity measures. We showed  
55  
56  
57  
58  
59  
60



1  
2  
3 large and rapid decreases in primary care for well-child care, immunizations, and sick visits with  
4 a substantial proportion of care delivered virtually. Ontarian but not Manitoban children from  
5 low socioeconomic status and urban neighbourhoods had less care. The pandemic, and measures  
6 instituted to assuage its impact, may have threatened essential elements of primary care,  
7 including the mechanisms in place to mitigate spread of vaccine preventable diseases, ensure  
8 early identification of developmental concerns, and reduce health inequities. The longer-term  
9 impact on child development, health, and vaccine coverage remains to be determined and  
10 understanding healthcare provider factors contributing to the shifts warrants further study.  
11  
12  
13  
14  
15  
16  
17  
18  
19  
20  
21  
22  
23  
24  
25  
26  
27  
28  
29  
30  
31  
32  
33  
34  
35  
36  
37  
38  
39  
40  
41  
42  
43  
44  
45  
46  
47  
48  
49  
50  
51  
52  
53  
54  
55  
56  
57  
58  
59  
60

Confidential

1  
2  
3 **List Exhibits:**  
4

5 *Main Exhibits*  
6

7 Figure 1. Observed and expected well-child and sick visits to primary care over time in Ontario  
8 (top) and Manitoba (bottom).  
9

10 Figure 2. Observed and expected well-child and sick visits to primary care over time in Ontario  
11 (left) and Manitoba (right) by age group.  
12

13 Figure 3. Adjusted relative rate of monthly well-child and sick visits in Ontario and Manitoba  
14 following the onset of the COVID-19 pandemic by material deprivation quintile.  
15

16 Figure 4. Adjusted relative rate of monthly well child and sick visits in Ontario and Manitoba  
17 following the onset of the COVID-19 pandemic by rurality.  
18

19 Figure 5. Adjusted relative rate of monthly well-child and sick visits in Ontario and Manitoba  
20 following the onset of the COVID-19 pandemic by immigrant status.  
21  
22  
23

24 *Supplementary Files*  
25

26 eTable 1: Baseline demographic characteristics of children and adolescents, ages 0 to 17 years,  
27 inclusive, in Ontario and Manitoba, 2017-2020  
28

29 eTable 2. Observed and expected adjusted relative change (RR, 95% CI) in primary care  
30 (overall, virtual, in-person), well-child, and sick visits in Ontario and Manitoba during the post-  
31 pandemic era.  
32

33 eTable 3. ONTARIO: Observed, expected and adjusted relative change (RR, 95% CI) in primary  
34 care, well-child, and sick visits in Ontario, during the post-pandemic era, by age group.  
35

36 eTable 4. MANITOBA: Observed, expected and adjusted relative change (RR, 95% CI) in  
37 primary care, well-child, and sick visits in Ontario, during the post-pandemic era, by age group.  
38

39 eTable 5. ONTARIO: Observed, expected and adjusted relative change (RR, 95% CI) in primary  
40 care (overall, virtual, in-person), well-child, and sick visits in Ontario, during the post-pandemic  
41 era, by material deprivation index.  
42

43 eTable 6. MANITOBA: Observed, expected and adjusted relative change (RR, 95% CI) in  
44 primary care (overall, virtual, in-person), well-child, and sick visits in Ontario, during the post-  
45 pandemic era, by material deprivation index.  
46

47 eTable 7 ONTARIO: Observed, expected, adjusted relative change (RR, 95% CI) in primary  
48 care, well-child, and sick visits in Ontario, during post-pandemic months, by rurality.  
49

50 eTable 8. MANITOBA. Observed, expected, adjusted relative change (RR, 95% CI) in primary  
51 care, well-child, and sick visits in Ontario, during post-pandemic months, by rurality.  
52  
53  
54  
55  
56  
57  
58  
59  
60

1  
2  
3 eTable 9. ONTARIO: Observed, expected, and adjusted relative change (RR, 95% CI) in  
4 primary care, well-child, and sick visits in Ontario, during post-pandemic months, by immigrant  
5 status.  
6

7 eTable 10. MANITOBA: Observed, expected, and adjusted relative change (RR, 95% CI) in  
8 primary care, well-child, and sick visits in Ontario, during post-pandemic months, by immigrant  
9 status.  
10

11 eTable 11. Virtual primary care visits among children and adolescents, in post-pandemic months,  
12 by equity lens.  
13  
14

15 eTable 12. Appendix A. List of primary care fee codes from Ontario and Manitoba.  
16  
17  
18  
19  
20  
21  
22  
23  
24  
25  
26  
27  
28  
29  
30  
31  
32  
33  
34  
35  
36  
37  
38  
39  
40  
41  
42  
43  
44  
45  
46  
47  
48  
49  
50  
51  
52  
53  
54  
55  
56  
57  
58  
59  
60

Confidential

## References

1. Starfield B, Shi L, Macinko J. Contribution of primary care to health systems and health. *Milbank Q*. 2005;83(3):457-502.
2. Williams TC, MacRae C, Swann OV, et al. Indirect effects of the COVID-19 pandemic on paediatric healthcare use and severe disease: a retrospective national cohort study. *Arch Dis Child*. 2021.
3. Heintzman J, O'Malley J, Marino M, et al. SARS-CoV-2 Testing and Changes in Primary Care Services in a Multistate Network of Community Health Centers During the COVID-19 Pandemic. *JAMA*. 2020;324(14):1459-1462.
4. *Changes to the Schedule of Benefits for Physician Services (Schedule) in response to COVID-19 influenza pandemic effective March 14, 2020*. Vol 4745.: Health Services Branch, Ministry of Health, Ontario Ministry of Health and Long-term Care.;2020.
5. Committee On Pediatric W, Marcin JP, Rimsza ME, Moskowitz WB. The Use of Telemedicine to Address Access and Physician Workforce Shortages. *Pediatrics*. 2015;136(1):202-209.
6. Matheson F, van Ingen T. *Ontario marginalization index*. . Toronto, Ontario: St. Michael's Hospital; Public Health Ontario.; 2016 2018.
7. Matheson FI, Dunn JR, Smith KL, Moineddin R, Glazier RH. Development of the Canadian Marginalization Index: a new tool for the study of inequality. *Can J Public Health*. 2012;103(8 Suppl 2):S12-16.
8. Chiu M, Lebenbaum M, Lam K, et al. Describing the linkages of the immigration, refugees and citizenship Canada permanent resident data and vital statistics death registry to Ontario's administrative health database. *BMC Med Inform Decis Mak*. 2016;16(1):135.
9. Urquia M, Walld R, Wanigaratne S, et al. Linking National Immigration Data to Provincial Repositories: The case of Canada. *International Journal of Population Data Science*. 2021;6(1).
10. Glazier RH, Green ME, Wu FC, Frymire E, Kopp A, Kiran T. Shifts in office and virtual primary care during the early COVID-19 pandemic in Ontario, Canada. *CMAJ*. 2021;193(6):E200-E210.
11. Cases and Risk of COVID-19 in Manitoba. 2021; <https://www.gov.mb.ca/covid19/updates/cases.html>. Accessed June 7th, 2021, 2021.
12. Macy ML, Huetteman P, Kan K. Changes in Primary Care Visits in the 24 Weeks After COVID-19 Stay-at-Home Orders Relative to the Comparable Time Period in 2019 in Metropolitan Chicago and Northern Illinois. *J Prim Care Community Health*. 2020;11:2150132720969557.
13. Siedner MJ, Kraemer JD, Meyer MJ, et al. Access to primary healthcare during lockdown measures for COVID-19 in rural South Africa: a longitudinal cohort study. *medRxiv*. 2020.
14. Basu S, Phillips RS, Phillips RL, Peterson L, Landon B. Primary Care Practice Finances In The United States Amid The COVID-19 Pandemic. *Health Aff (Millwood)*. 2020;39(9).
15. Goldman RD, Grafstein E, Barclay N, Irvine MA, Portales-Casamar E. Paediatric patients seen in 18 emergency departments during the COVID-19 pandemic. *Emerg Med J*. 2020;37(12):773-777.

16. Dann L, Fitzsimons J, Gorman KM, Hourihane J, Okafor I. Disappearing act: COVID-19 and paediatric emergency department attendances. *Arch Dis Child*. 2020;105(8):810-811.
17. Li A, Harries M, Ross LF. Reopening K-12 Schools in the Era of Coronavirus Disease 2019: Review of State-Level Guidance Addressing Equity Concerns. *J Pediatr*. 2020;227:38-44 e37.
18. Chmielewski AK, Khan O. Toronto's Rich Neighbourhoods Opt for In-Person School. *Medium.com*. September 9, 2020, 2020.
19. *COVID-19 in Ontario - a focus on material deprivation: January 15, 2020 to June 3, 2020*. Ontario: Ontario Agency for Health Protection and Promotion (Public Health Ontario); 2020 2020.
20. Schweiberger K, Hoberman A, Iagnemma J, et al. Practice-Level Variation in Telemedicine Use in a Pediatric Primary Care Network During the COVID-19 Pandemic: Retrospective Analysis and Survey Study. *J Med Internet Res*. 2020;22(12):e24345.
21. Guttman A, Chung H. *Vaccine Coverage by Neighbourhood COVID-19 Risk in Immigrants, Refugees, and other Newcomers, up to April 26, 2021* Toronto, Canada: ICES; April 29, 2021 2021.
22. Marcin JP, Shaikh U, Steinhorn RH. Addressing health disparities in rural communities using telehealth. *Pediatr Res*. 2016;79(1-2):169-176.
23. Wilcock AD, Rose S, Busch AB, et al. Association Between Broadband Internet Availability and Telemedicine Use. *JAMA Intern Med*. 2019;179(11):1580-1582.
24. Brownell M, Chartier M, Santos R, et al. *How are Manitoba's Children Doing?* Winnipeg, MB: Manitoba Centre for Health Policy; October 2012.
25. Buajitti E, Chiodo S, Rosella LC. Agreement between area- and individual-level income measures in a population-based cohort: Implications for population health research. *SSM Popul Health*. 2020;10:100553.
26. Glazier R, Zagorski B, Rayner J. *Comparison of Primary Care Models in Ontario by Demographics, Case Mix and Emergency Department Use, 2008/09 to 2009/10*. ICES Investigative Report. Toronto: Institute for Clinical Evaluative Sciences;2012.

1  
2  
3  
4  
5  
6  
7  
8  
9  
10  
11  
12  
13  
14  
15  
16  
17  
18  
19  
20  
21  
22  
23  
24  
25  
26  
27  
28  
29  
30  
31  
32  
33  
34  
35  
36  
37  
38  
39  
40  
41  
42  
43  
44  
45  
46  
47  
48  
49  
50  
51  
52  
53  
54  
55  
56  
57  
58  
59  
60

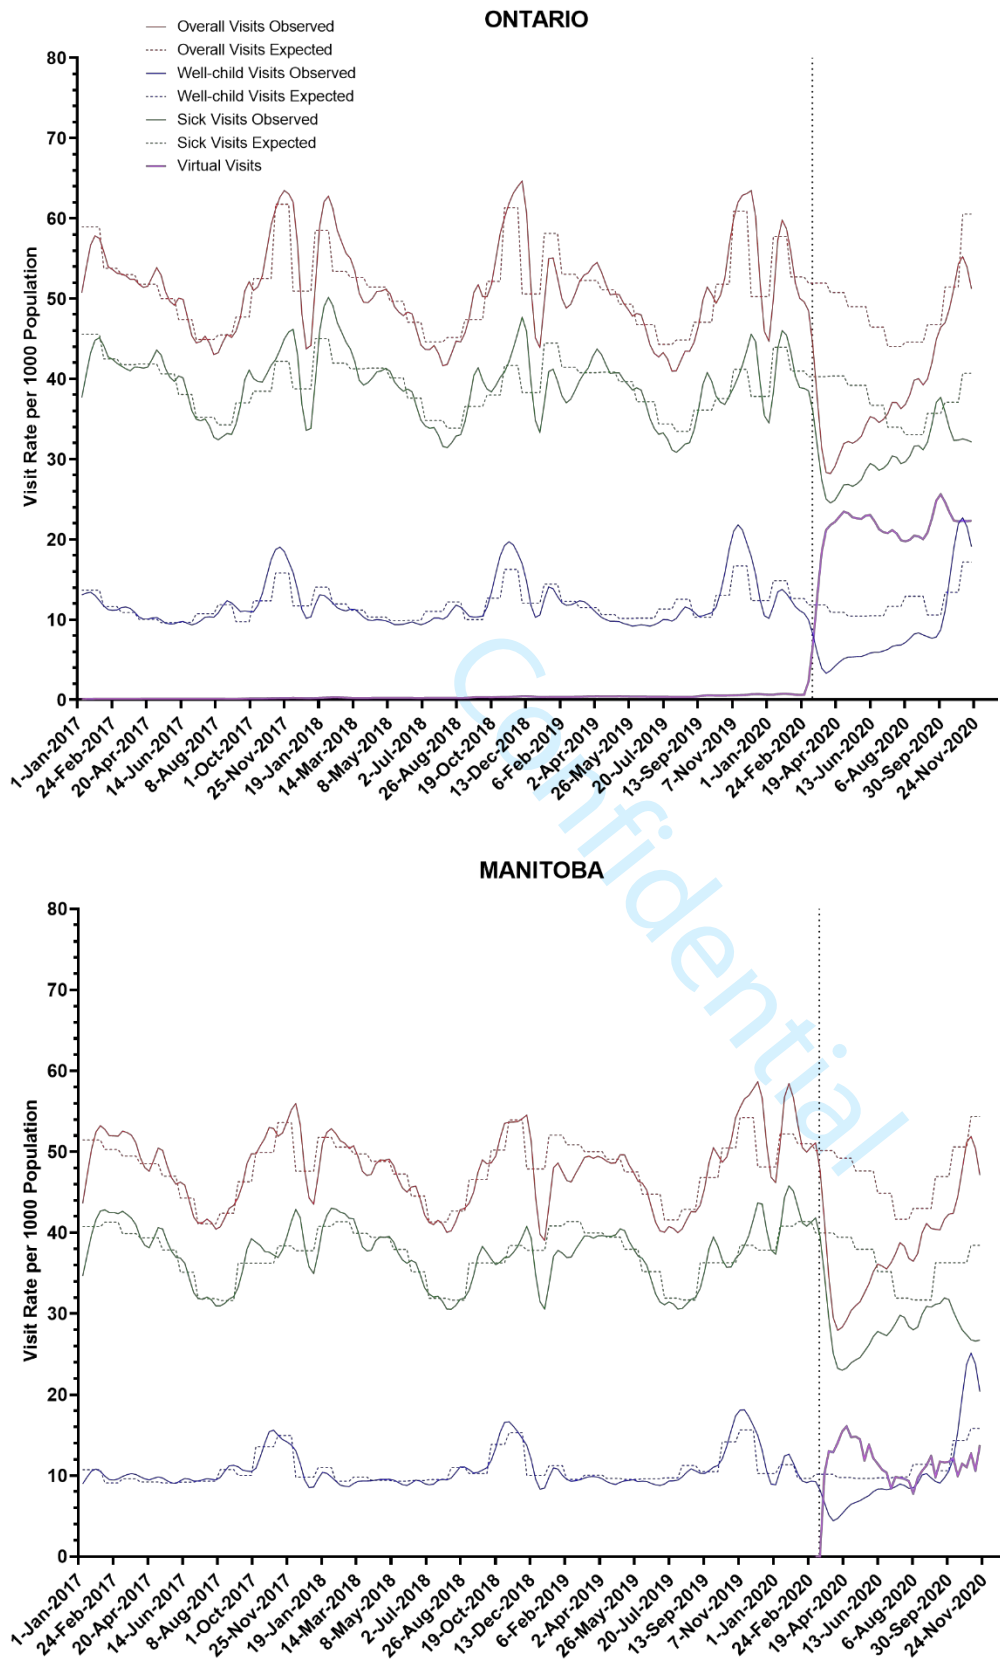

Figure 1. Observed and expected well-child and sick visits to primary care over time in Ontario (top) and Manitoba (bottom).

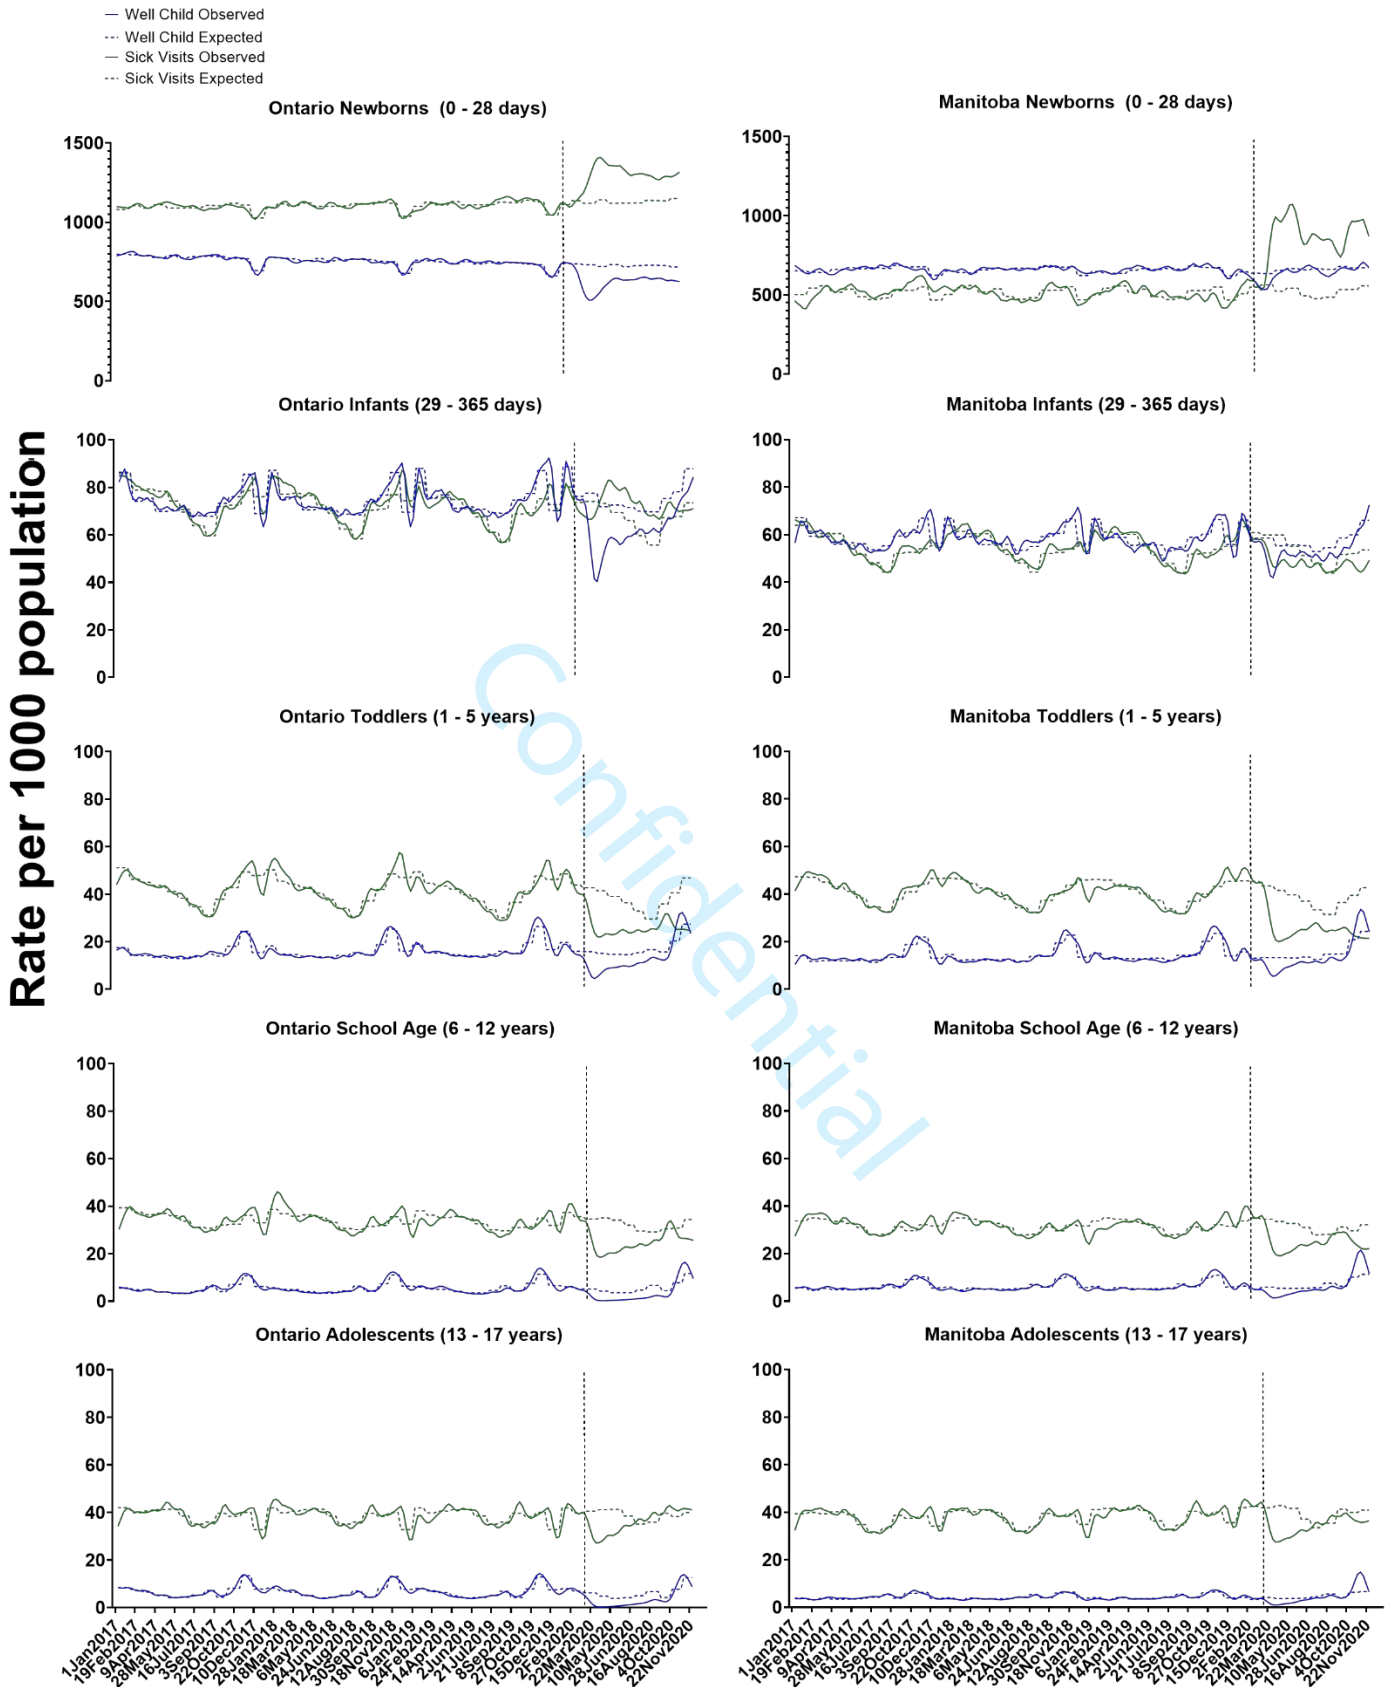

Figure 2. Observed and expected well-child and sick visits to primary care over time in Ontario (left) and Manitoba (right) by age group.

1  
2  
3  
4  
5  
6  
7  
8  
9  
10  
11  
12  
13  
14  
15  
16  
17  
18  
19  
20  
21  
22  
23  
24  
25  
26  
27  
28  
29  
30  
31  
32  
33  
34  
35  
36  
37  
38  
39  
40  
41  
42  
43  
44  
45  
46  
47

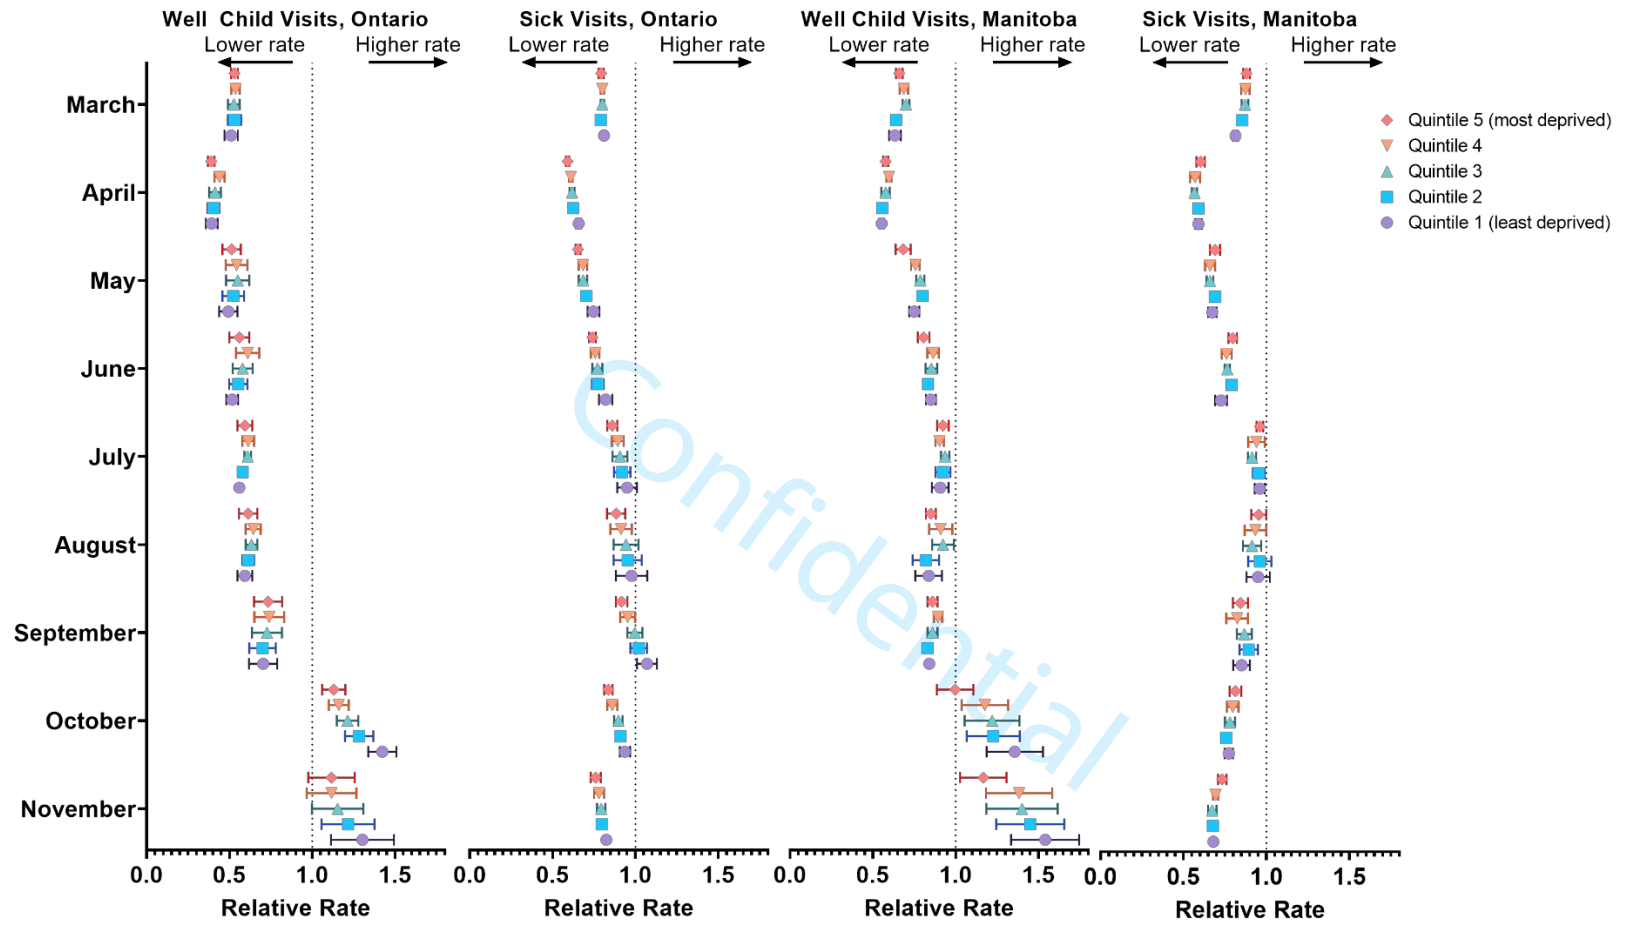

Figure 3. Adjusted relative rate of monthly well-child and sick visits in Ontario and Manitoba following the onset of the COVID-19 pandemic by material deprivation quintile.



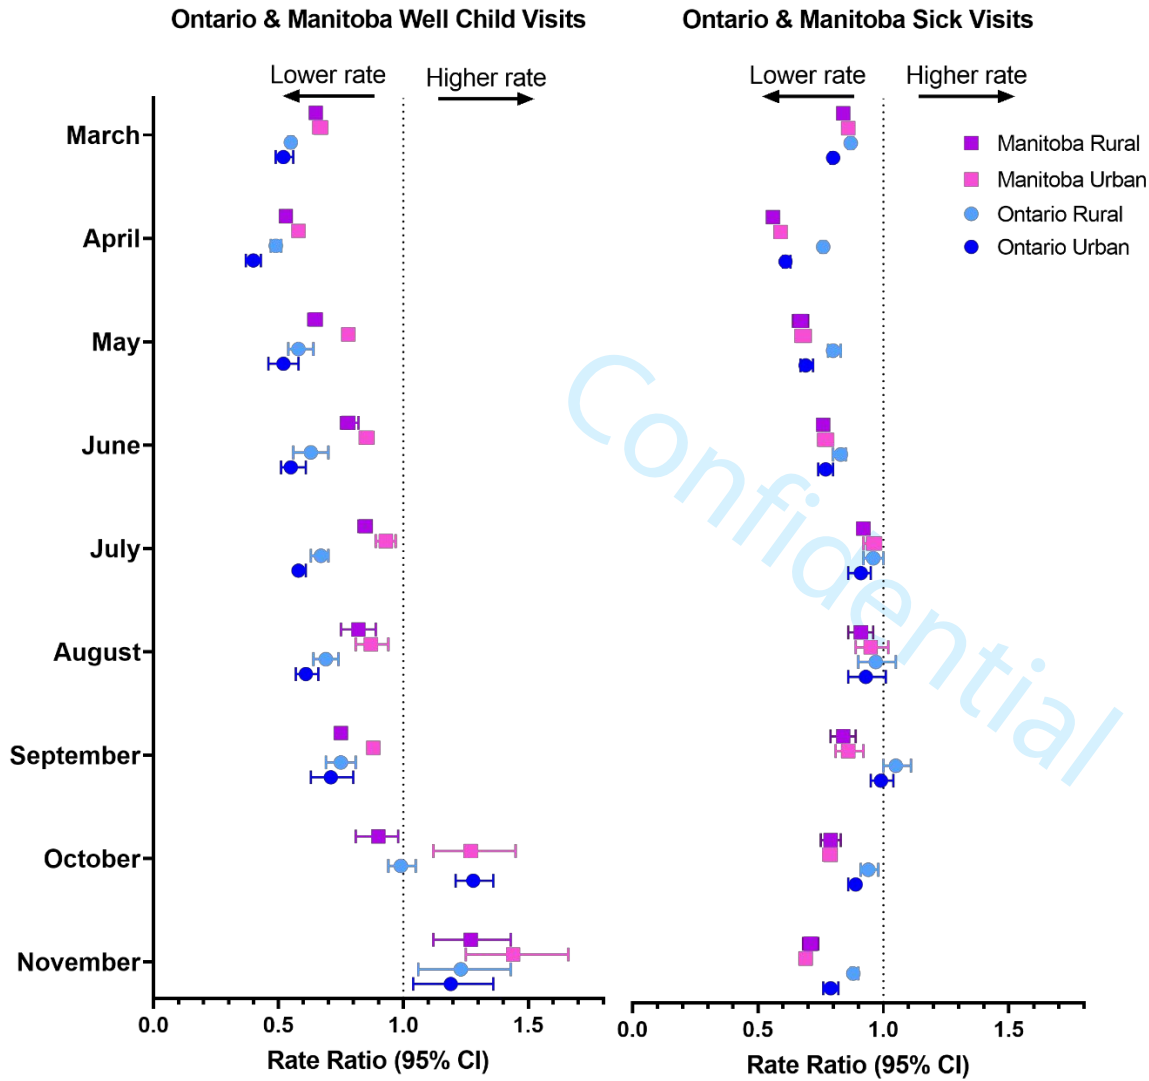

1  
2  
3  
4  
5  
6  
7  
8  
9  
10  
11  
12  
13  
14  
15  
16  
17  
18  
19  
20  
21  
22  
23  
24  
25  
26  
27  
28  
29  
30  
31  
32  
33  
34  
35  
36  
37  
38  
39  
40  
41  
42  
43  
44  
45  
46  
47

Figure 4. Adjusted relative rate of monthly well child and sick visits in Ontario and Manitoba following the onset of the COVID-19 pandemic by rurality.

Confidential

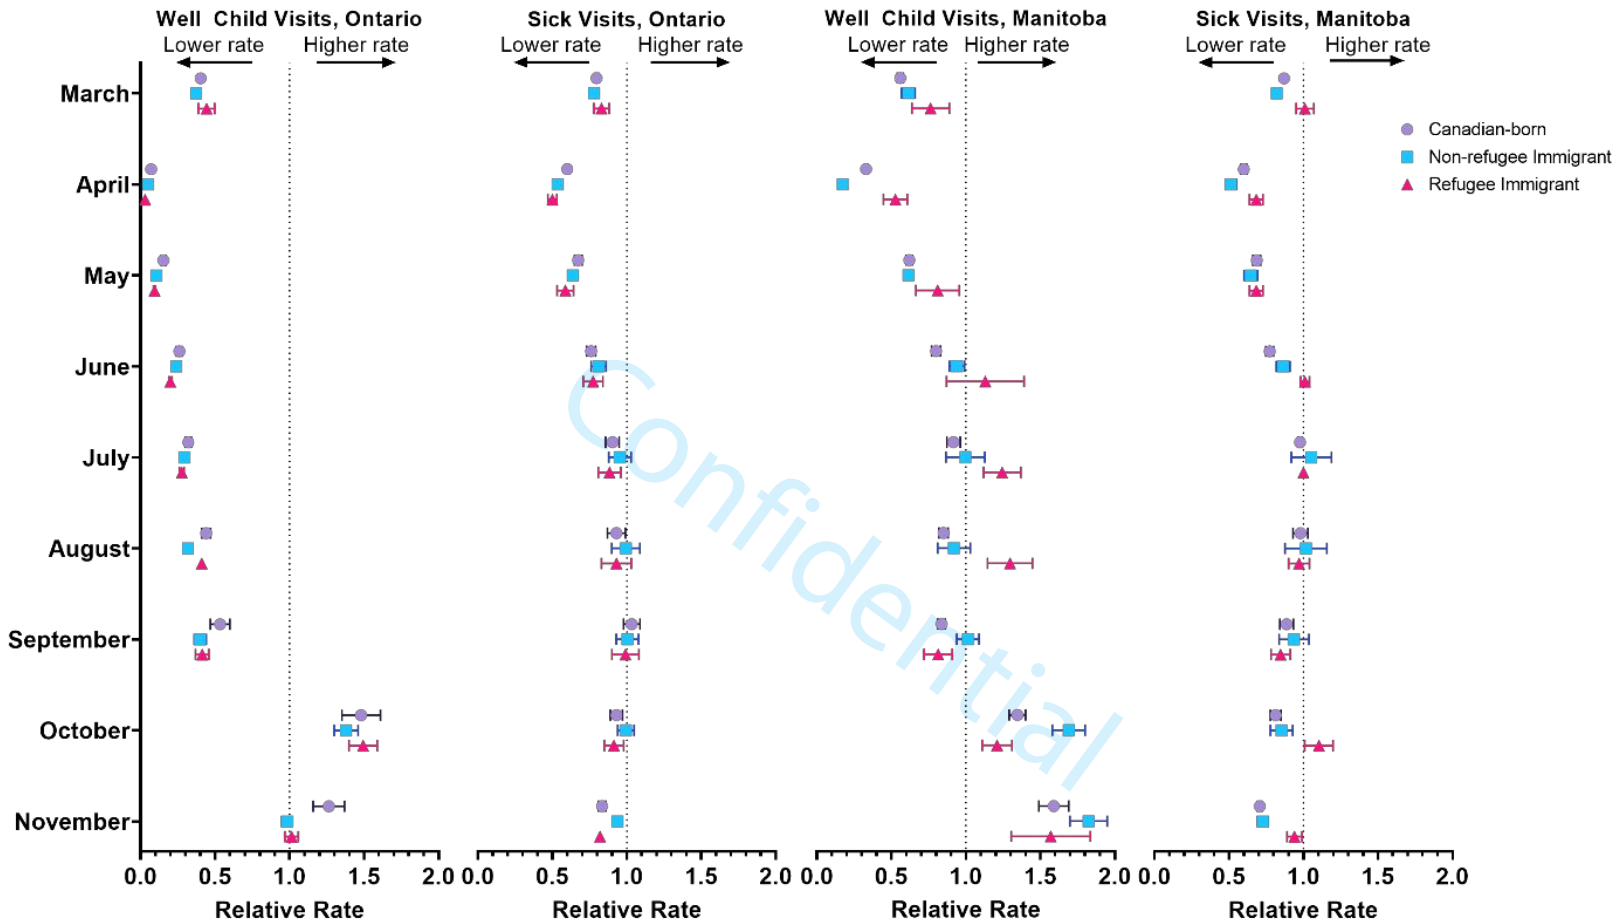

Figure 5. Adjusted relative rate of monthly well-child and sick visits in Ontario and Manitoba following the onset of the COVID-19 pandemic by immigrant status.

**eTable 1: Baseline demographic characteristics of children and adolescents, ages 0 to 17 years, inclusive, in Ontario and Manitoba, 2017-2020**

|                                             | Ontario          |                  |                  |                  | Manitoba       |                 |                |                |
|---------------------------------------------|------------------|------------------|------------------|------------------|----------------|-----------------|----------------|----------------|
| Year                                        | 2017             | 2018             | 2019             | 2020             | 2017           | 2018            | 2019           | 2020           |
| Children and adolescents on January 1st, N  | 2,761,302        | 2,776,698        | 2,800,407        | 2,829,172        | 306,813        | 310,111         | 311,212        | 313,395        |
| <b>Age</b>                                  |                  |                  |                  |                  |                |                 |                |                |
| Mean ± SD                                   | 8.70 ± 5.13      | 8.70 ± 5.12      | 8.72 ± 5.12      | 8.73 ± 5.11      | 8.96 ± 5.17    | 8.95 ± 5.16     | 8.93 ± 5.13    | 8.96 ± 5.11    |
| Median (IQR)                                | 9 (4-13)         | 9 (4-13)         | 9 (4-13)         | 9 (4-13)         | 9 (4-13)       | 9 (4-13)        | 9 (4-13)       | 9 (4-13)       |
| <b>Age group, n (%)</b>                     |                  |                  |                  |                  |                |                 |                |                |
| Newborns 0 to 28 days*                      | 140,537          | 139,911          | 139,901          | 115,778          | 17,282         | 16,885          | 16,618         | 14,782         |
| 29 to 365 days                              | 131,375 (4.8)    | 130,602 (4.7)    | 130,260 (4.7)    | 130,494 (4.6)    | 15,698 (5.1)   | 15,883 (5.1)    | 15,955 (5.1)   | 15,530 (5.0)   |
| > 1 to 5 years                              | 742,356 (26.9)   | 744,524 (26.8)   | 746,450 (26.7)   | 753,127 (26.6)   | 87,222 (28.4)  | 88,136 (28.4)   | 88,303 (28.4)  | 88,369 (28.2)  |
| 6 to 12 years                               | 1,096,809 (39.7) | 1,107,217 (39.9) | 1,121,055 (40.0) | 1,132,943 (40.0) | 120,121 (39.2) | 122,353 (39.5)  | 124,220 (39.9) | 126,181 (40.3) |
| 13 to 17 years                              | 790,762 (28.6)   | 794,355 (28.6)   | 802,642 (28.7)   | 812,608 (28.7)   | 83,772 (27.3)  | 83,739 (27.0)   | 82,734 (26.6)  | 83,315 (26.6)  |
| <b>Sex, n (%)</b>                           |                  |                  |                  |                  |                |                 |                |                |
| Female                                      | 1,344,457 (48.7) | 1,352,005 (48.7) | 1,363,728 (48.7) | 1,377,931 (48.7) | 149,272 (48.7) | 150,890 (48.7)  | 151,469 (48.7) | 152,583 (48.7) |
| Male                                        | 1,416,845 (51.3) | 1,424,693 (51.3) | 1,436,679 (51.3) | 1,451,241 (51.3) | 157,541 (51.4) | 159,221 (51.3)  | 159,743 (51.3) | 160,812 (51.3) |
| <b>Rurality, n (%)</b>                      |                  |                  |                  |                  |                |                 |                |                |
| Urban                                       | 2,485,062 (90.0) | 2,497,901 (90.0) | 2,518,679 (89.9) | 2,543,736 (89.9) | 210,245 (68.5) | 212,892 (68.7)  | 213,045 (68.5) | 213,820 (68.2) |
| Rural                                       | 269,754 (9.8)    | 271,559 (9.8)    | 273,500 (9.8)    | 275,592 (9.7)    | 96,568 (31.5)  | 97,219** (31.3) | 97,758 (31.4)  | 98,773 (31.5)  |
| Missing                                     | 6,486 (0.2)      | 7,238 (0.3)      | 8,228 (0.3)      | 9,844 (0.3)      | 0 (0.0)        | < 6             | 409 (0.1)      | 802 (0.3)      |
| <b>Material deprivation quintile, n (%)</b> |                  |                  |                  |                  |                |                 |                |                |
| Q1 (lowest)                                 | 629,475 (22.8)   | 643,277 (23.2)   | 658,048 (23.5)   | 672,771 (23.8)   | 61,371 (20.0)  | 62,077 (20.0)   | 62,231 (20.0)  | 62,686 (20.0)  |
| Q2                                          | 584,527 (21.2)   | 588,752 (21.2)   | 594,765 (21.2)   | 601,189 (21.2)   | 61,291 (20.0)  | 61,858 (19.9)   | 62,195 (20.0)  | 62,624 (20.0)  |
| Q3                                          | 509,432 (18.4)   | 509,138 (18.3)   | 511,701 (18.3)   | 514,908 (18.2)   | 61,413 (20.0)  | 61,986 (20.0)   | 62,222 (20.0)  | 62,696 (20.0)  |
| Q4                                          | 470,261 (17.0)   | 468,997 (16.9)   | 469,988 (16.8)   | 472,749 (16.7)   | 61,209 (19.9)  | 61,852 (19.9)   | 62,144 (20.0)  | 62,437 (19.9)  |
| Q5 (highest)                                | 535,311 (19.4)   | 533,274 (19.2)   | 531,452 (19.0)   | 531,273 (18.8)   | 61,357 (20.0)  | 62,078 (20.0)   | 62,257 (20.0)  | 62,874 (20.1)  |
| missing                                     | 32,296 (1.2)     | 33,260 (1.2)     | 34,453 (1.2)     | 36,282 (1.3)     | 172 (0.1%)     | 260 (0.1)       | 163 (0.1)      | 78 (0.0)       |
| <b>Immigrant status, n (%)</b>              |                  |                  |                  |                  |                |                 |                |                |
| Non-refugee Immigrants                      | 141,983 (5.1)    | 126,321 (4.5)    | 109,697 (3.9)    | 95,549 (3.4)     | 27,487 (9.0)   | 27,444 (8.8)    | 24,174 (7.8)   | 21,207 (6.8)   |
| Refugees                                    | 41,434 (1.5)     | 37,658 (1.4)     | 33,328 (1.2)     | 29,522 (1.0)     | 3,736 (1.2)    | 3,867 (1.2)     | 3,321 (1.1)    | 2,887 (0.9)    |
| Canadian-born                               | 2,577,883 (93.4) | 2,571,754 (92.6) | 2,566,491 (91.6) | 2,559,252 (90.5) | 275,590 (89.8) | 277,451 (89.5)  | 275,776 (88.6) | 275,386 (87.9) |

SD, standard deviation; IQR, interquartile range ; Q, quintile.

\*Newborns not included in sociodemographic groupings presented in above table. Newborns in 2020 only include those born to October 28, 2020.

\*\*Institutional policy precludes reporting of cell sizes <6. Missing values <6 combined with 'Rural' to prevent back calculation of small cell sizes.

**eTable 2. Observed, expected and adjusted relative change (RR, 95% CI) in primary care (overall, virtual, in-person), well-child, and sick visits in Ontario and Manitoba during the post-pandemic era. All rates are weekly visit rates per 1000 population and do not include newborns.**

|                                                  | Ontario         |               |                         | Manitoba        |               |                         |
|--------------------------------------------------|-----------------|---------------|-------------------------|-----------------|---------------|-------------------------|
|                                                  | Observed rate   | Expected rate | RR (95% CI)             | Observed rate   | Expected rate | RR (95% CI)             |
| <b>All primary care visits</b>                   |                 |               |                         |                 |               |                         |
| Overall                                          | 39.5            | 49.5          | 0.80 (0.77, 0.82)       | 39.0            | 47.7          | 0.82 (0.79, 0.84)       |
| March                                            | 38.4            | 51.9          | 0.74 (0.73, 0.74)       | 41.0            | 50.1          | 0.82 (0.80, 0.83)       |
| April                                            | 29.6            | 50.8          | 0.58 (0.58, 0.59)       | 28.6            | 49.2          | 0.58 (0.56, 0.60)       |
| May                                              | 32.8            | 49.0          | 0.67 (0.66, 0.68)       | 33.0            | 47.6          | 0.69 (0.67, 0.71)       |
| June                                             | 34.3            | 46.4          | 0.74 (0.72, 0.75)       | 35.2            | 44.9          | 0.78 (0.77, 0.80)       |
| July                                             | 37.7            | 44.0          | 0.86 (0.84, 0.88)       | 39.1            | 41.7          | 0.94 (0.92, 0.96)       |
| August                                           | 38.9            | 44.6          | 0.87 (0.83, 0.92)       | 39.6            | 43.0          | 0.92 (0.88, 0.96)       |
| September                                        | 43.1            | 46.8          | 0.92 (0.90, 0.95)       | 40.2            | 46.9          | 0.86 (0.82, 0.89)       |
| October                                          | 50.0            | 51.5          | 0.97 (0.95, 0.99)       | 46.0            | 50.6          | 0.91 (0.89, 0.93)       |
| November                                         | 52.8            | 60.5          | 0.87 (0.84, 0.91)       | 49.2            | 54.4          | 0.90 (0.88, 0.93)       |
| <b>Well-child visits</b>                         |                 |               |                         |                 |               |                         |
| Overall                                          | 8.9             | 12.2          | 0.73 (0.66, 0.80)       | 10.4            | 11.2          | 0.93 (0.87, 1.00)       |
| March                                            | 6.2             | 11.8          | 0.52 (0.49, 0.56)       | 6.7             | 10.2          | 0.66 (0.64, 0.68)       |
| April                                            | 4.4             | 10.9          | 0.41 (0.38, 0.44)       | 5.5             | 9.8           | 0.57 (0.55, 0.58)       |
| May                                              | 5.4             | 10.5          | 0.52 (0.46, 0.58)       | 7.3             | 9.6           | 0.76 (0.74, 0.78)       |
| June                                             | 5.9             | 10.5          | 0.56 (0.51, 0.61)       | 8.2             | 9.7           | 0.84 (0.81, 0.87)       |
| July                                             | 6.9             | 11.7          | 0.59 (0.57, 0.61)       | 9.0             | 9.8           | 0.91 (0.88, 0.94)       |
| August                                           | 8.0             | 12.9          | 0.62 (0.58, 0.66)       | 9.8             | 11.4          | 0.86 (0.80, 0.93)       |
| September                                        | 7.6             | 10.6          | 0.71 (0.63, 0.81)       | 9.1             | 10.6          | 0.86 (0.84, 0.88)       |
| October                                          | 16.9            | 13.4          | 1.26 (1.19, 1.34)       | 17.5            | 14.3          | 1.22 (1.08, 1.38)       |
| November                                         | 20.5            | 17.2          | 1.19 (1.04, 1.37)       | 22.5            | 15.8          | 1.42 (1.23, 1.64)       |
| <b>Well-child visits (with immunizations)</b>    |                 |               |                         |                 |               |                         |
| Overall                                          | 7.8             | 9.3           | 0.83 (0.73, 0.95)       | 6.5             | 6.5           | 1.00 (0.85, 1.17)       |
| March                                            | 4.9             | 8.7           | 0.56 (0.54, 0.59)       | 3.4             | 4.9           | 0.69 (0.59, 0.81)       |
| April                                            | 4.0             | 7.5           | 0.53 (0.49, 0.59)       | 2.8             | 4.6           | 0.61 (0.54, 0.68)       |
| May                                              | 4.8             | 7.1           | 0.68 (0.58, 0.79)       | 3.6             | 4.4           | 0.80 (0.69, 0.93)       |
| June                                             | 5.0             | 6.9           | 0.72 (0.61, 0.84)       | 3.7             | 4.8           | 0.78 (0.66, 0.92)       |
| July                                             | 5.7             | 7.1           | 0.80 (0.69, 0.92)       | 4.2             | 4.7           | 0.88 (0.73, 1.07)       |
| August                                           | 6.4             | 8.2           | 0.78 (0.73, 0.84)       | 4.5             | 5.4           | 0.83 (0.75, 0.92)       |
| September                                        | 6.1             | 7.5           | 0.82 (0.71, 0.95)       | 4.8             | 5.3           | 0.90 (0.79, 1.03)       |
| October                                          | 15.7            | 11.8          | 1.33 (1.19, 1.49)       | 14.3            | 11.1          | 1.29 (1.05, 1.58)       |
| November                                         | 19.3            | 18.3          | 1.06 (0.86, 1.31)       | 19.4            | 12.9          | 1.50 (1.25, 1.81)       |
| <b>Well-child visits (without immunizations)</b> |                 |               |                         |                 |               |                         |
| Overall                                          | 1.1             | 2.8           | 0.39 (0.36, 0.42)       | 3.9             | 4.7           | 0.83 (0.73, 0.94)       |
| March                                            | 1.3             | 3.0           | 0.43 (0.42, 0.45)       | 3.4             | 5.1           | 0.66 (0.61, 0.73)       |
| April                                            | 0.4             | 2.7           | 0.15 (0.15, 0.16)       | 2.8             | 4.9           | 0.56 (0.52, 0.61)       |
| May                                              | 0.6             | 2.6           | 0.24 (0.22, 0.26)       | 3.7             | 4.9           | 0.76 (0.70, 0.84)       |
| June                                             | 0.9             | 2.8           | 0.32 (0.31, 0.34)       | 4.4             | 4.8           | 0.92 (0.83, 1.03)       |
| July                                             | 1.2             | 3.2           | 0.38 (0.35, 0.41)       | 4.8             | 4.9           | 0.99 (0.85, 1.15)       |
| August                                           | 1.6             | 3.8           | 0.41 (0.35, 0.48)       | 5.3             | 5.8           | 0.92 (0.75, 1.13)       |
| September                                        | 1.5             | 3.0           | 0.48 (0.47, 0.50)       | 4.3             | 5.1           | 0.85 (0.75, 0.96)       |
| October                                          | 1.2             | 2.7           | 0.44 (0.43, 0.45)       | 3.2             | 4.2           | 0.75 (0.68, 0.82)       |
| November                                         | 1.2             | 2.6           | 0.45 (0.44, 0.47)       | 3.1             | 4.0           | 0.77 (0.70, 0.86)       |
| <b>Sick visits</b>                               |                 |               |                         |                 |               |                         |
| Overall                                          | 30.6            | 37.4          | 0.82 (0.78, 0.85)       | 28.6            | 36.5          | 0.78 (0.75, 0.81)       |
| March                                            | 32.2            | 40.3          | 0.80 (0.79, 0.81)       | 34.3            | 40.0          | 0.86 (0.85, 0.87)       |
| April                                            | 25.1            | 40.4          | 0.62 (0.61, 0.64)       | 23.0            | 39.5          | 0.58 (0.56, 0.61)       |
| May                                              | 27.3            | 39.2          | 0.70 (0.67, 0.72)       | 25.7            | 38.0          | 0.68 (0.65, 0.70)       |
| June                                             | 28.4            | 36.7          | 0.77 (0.75, 0.81)       | 27.0            | 35.2          | 0.77 (0.74, 0.79)       |
| July                                             | 30.9            | 34.0          | 0.91 (0.87, 0.95)       | 30.2            | 31.9          | 0.94 (0.92, 0.97)       |
| August                                           | 30.9            | 33.0          | 0.93 (0.86, 1.01)       | 29.8            | 31.7          | 0.94 (0.89, 1.00)       |
| September                                        | 35.5            | 35.7          | 1.00 (0.95, 1.04)       | 31.1            | 36.3          | 0.86 (0.81, 0.91)       |
| October                                          | 33.1            | 37.1          | 0.89 (0.87, 0.92)       | 28.5            | 36.3          | 0.79 (0.76, 0.81)       |
| November                                         | 32.3            | 40.7          | 0.79 (0.77, 0.82)       | 26.7            | 38.4          | 0.69 (0.68, 0.71)       |
| <b>Virtual primary care visits</b>               |                 |               |                         |                 |               |                         |
| Overall                                          | <b>Observed</b> |               | <b>% virtual visits</b> | <b>Observed</b> |               | <b>% virtual visits</b> |
|                                                  | 20.8            |               | 52.8%                   | 11.4            |               | 29.3%                   |

|   |           |      |  |       |      |  |       |
|---|-----------|------|--|-------|------|--|-------|
| 1 | March     | 12.5 |  | 32.5% | 9.0  |  | 22.0% |
| 2 | April     | 22.3 |  | 75.5% | 15.1 |  | 52.8% |
| 3 | May       | 22.9 |  | 70.0% | 13.4 |  | 40.7% |
| 4 | June      | 21.4 |  | 62.5% | 10.2 |  | 29.1% |
| 5 | July      | 21.3 |  | 56.5% | 9.6  |  | 24.6% |
| 6 | August    | 20.0 |  | 51.6% | 10.4 |  | 26.1% |
| 7 | September | 23.6 |  | 54.8% | 11.2 |  | 27.9% |
| 8 | October   | 22.9 |  | 45.8% | 11.2 |  | 24.2% |
| 9 | November  | 22.3 |  | 42.2% | 12.4 |  | 25.3% |

10  
11  
12  
13  
14  
15  
16  
17  
18  
19  
20  
21  
22  
23  
24  
25  
26  
27  
28  
29  
30  
31  
32  
33  
34  
35  
36  
37  
38  
39  
40  
41  
42  
43  
44  
45  
46  
47  
48  
49  
50  
51  
52  
53  
54  
55  
56  
57  
58  
59  
60

Confidential

**eTable 3. ONTARIO: Observed, expected and adjusted relative change (RR, 95% CI) in primary care, well-child, and sick visits in Ontario, during the post-pandemic era, by age group.** All rates are weekly visit rates per 1000 population.

|                                                  | Observed rate | Expected rate | RR (95% CI)       | Observed rate     | Expected rate | RR (95% CI)       | Observed rate    | Expected rate | RR (95% CI)       | Observed rate     | Expected rate | RR (95% CI)       | Observed rate      | Expected rate | RR (95% CI)       |  |
|--------------------------------------------------|---------------|---------------|-------------------|-------------------|---------------|-------------------|------------------|---------------|-------------------|-------------------|---------------|-------------------|--------------------|---------------|-------------------|--|
|                                                  | Newborns      |               |                   | Age 29 - 365 days |               |                   | Age 1 to 5 years |               |                   | Age 6 to 12 years |               |                   | Age 13 to 17 years |               |                   |  |
| <b>All primary care visits</b>                   |               |               |                   |                   |               |                   |                  |               |                   |                   |               |                   |                    |               |                   |  |
| Overall                                          | 1928.7        | 1838.8        | 1.05 (1.04, 1.06) | 135.0             | 142.1         | 0.95 (0.94, 0.96) | 39.5             | 56.3          | 0.70 (0.70, 0.71) | 28.3              | 37.9          | 0.75 (0.74, 0.76) | 39.7               | 44.5          | 0.89 (0.88, 0.91) |  |
| March                                            | 1783.5        | 1849.9        | 0.96 (0.96, 0.97) | 121.7             | 151.5         | 0.80 (0.80, 0.81) | 41.0             | 58.6          | 0.70 (0.70, 0.70) | 28.9              | 39.8          | 0.73 (0.72, 0.73) | 35.9               | 46.7          | 0.77 (0.77, 0.77) |  |
| April                                            | 1972.4        | 1860.3        | 1.06 (1.05, 1.07) | 130.6             | 145.1         | 0.90 (0.89, 0.91) | 28.9             | 56.5          | 0.51 (0.51, 0.51) | 19.1              | 39.3          | 0.49 (0.48, 0.49) | 28.5               | 45.9          | 0.62 (0.61, 0.63) |  |
| May                                              | 2002.3        | 1852.1        | 1.08 (1.07, 1.09) | 138.3             | 141.9         | 0.97 (0.96, 0.99) | 32.7             | 53.7          | 0.61 (0.60, 0.61) | 21.3              | 37.8          | 0.56 (0.55, 0.57) | 32.0               | 45.0          | 0.71 (0.70, 0.72) |  |
| June                                             | 1956.8        | 1838.0        | 1.06 (1.06, 1.07) | 133.2             | 137.4         | 0.97 (0.95, 0.98) | 33.5             | 50.8          | 0.66 (0.65, 0.67) | 23.0              | 35.6          | 0.65 (0.63, 0.66) | 35.0               | 42.5          | 0.82 (0.81, 0.83) |  |
| July                                             | 1944.6        | 1846.9        | 1.05 (1.04, 1.06) | 137.9             | 129.4         | 1.07 (1.05, 1.08) | 36.5             | 47.8          | 0.76 (0.76, 0.77) | 25.7              | 33.9          | 0.76 (0.75, 0.77) | 39.6               | 40.0          | 0.99 (0.96, 1.02) |  |
| August                                           | 1930.2        | 1864.5        | 1.04 (1.03, 1.04) | 127.9             | 125.0         | 1.02 (1.00, 1.05) | 37.7             | 45.5          | 0.83 (0.82, 0.83) | 27.2              | 35.3          | 0.77 (0.76, 0.77) | 42.0               | 42.6          | 0.99 (0.96, 1.01) |  |
| September                                        | 1934.0        | 1860.7        | 1.04 (1.03, 1.05) | 137.2             | 142.3         | 0.96 (0.95, 0.98) | 42.5             | 51.6          | 0.82 (0.81, 0.84) | 32.8              | 35.1          | 0.93 (0.91, 0.96) | 42.7               | 43.8          | 0.98 (0.96, 0.99) |  |
| October                                          | 1913.3        | 1865.5        | 1.03 (1.02, 1.04) | 142.5             | 145.6         | 0.98 (0.96, 0.99) | 50.4             | 60.7          | 0.83 (0.83, 0.83) | 38.6              | 38.5          | 1.00 (0.99, 1.02) | 50.5               | 46.0          | 1.10 (1.09, 1.11) |  |
| November                                         |               |               |                   | 149.6             | 161.1         | 0.93 (0.92, 0.94) | 54.0             | 74.4          | 0.73 (0.72, 0.73) | 40.3              | 46.3          | 0.87 (0.87, 0.87) | 53.5               | 52.9          | 1.01 (1.00, 1.02) |  |
| <b>Well-child visits</b>                         |               |               |                   |                   |               |                   |                  |               |                   |                   |               |                   |                    |               |                   |  |
| Overall                                          | 614.8         | 716.1         | 0.86 (0.85, 0.87) | 62.2              | 74.5          | 0.83 (0.83, 0.84) | 13.4             | 17.3          | 0.78 (0.77, 0.78) | 3.5               | 5.8           | 0.61 (0.61, 0.61) | 3.6                | 6.2           | 0.57 (0.55, 0.58) |  |
| March                                            | 512.0         | 731.1         | 0.70 (0.69, 0.71) | 53.7              | 77.5          | 0.69 (0.69, 0.70) | 8.2              | 15.8          | 0.52 (0.52, 0.52) | 2.1               | 5.1           | 0.41 (0.41, 0.41) | 2.4                | 6.2           | 0.40 (0.40, 0.40) |  |
| April                                            | 572.0         | 720.7         | 0.79 (0.78, 0.81) | 52.3              | 71.8          | 0.73 (0.73, 0.73) | 6.9              | 15.1          | 0.46 (0.45, 0.46) | 0.2               | 4.2           | 0.05 (0.05, 0.06) | 0.3                | 4.8           | 0.07 (0.07, 0.07) |  |
| May                                              | 642.9         | 732.7         | 0.88 (0.86, 0.89) | 57.6              | 72.5          | 0.80 (0.79, 0.80) | 9.2              | 14.7          | 0.62 (0.62, 0.63) | 0.4               | 3.6           | 0.11 (0.11, 0.11) | 0.6                | 3.9           | 0.15 (0.15, 0.16) |  |
| June                                             | 633.8         | 719.1         | 0.88 (0.87, 0.89) | 58.4              | 71.5          | 0.82 (0.81, 0.83) | 9.6              | 14.5          | 0.66 (0.66, 0.66) | 0.7               | 3.6           | 0.21 (0.21, 0.21) | 1.1                | 4.1           | 0.27 (0.26, 0.27) |  |
| July                                             | 646.3         | 726.1         | 0.89 (0.88, 0.90) | 63.4              | 70.0          | 0.91 (0.90, 0.91) | 11.2             | 15.3          | 0.73 (0.73, 0.73) | 1.1               | 4.6           | 0.25 (0.25, 0.25) | 1.7                | 5.0           | 0.34 (0.33, 0.35) |  |
| August                                           | 642.3         | 728.5         | 0.88 (0.87, 0.89) | 60.8              | 69.7          | 0.87 (0.86, 0.89) | 12.8             | 16.6          | 0.77 (0.77, 0.77) | 2.1               | 6.7           | 0.32 (0.32, 0.32) | 3.1                | 6.7           | 0.46 (0.45, 0.47) |  |
| September                                        | 643.8         | 726.9         | 0.89 (0.87, 0.90) | 65.5              | 75.2          | 0.87 (0.87, 0.87) | 12.1             | 15.7          | 0.77 (0.77, 0.77) | 1.7               | 4.4           | 0.38 (0.38, 0.38) | 2.3                | 4.2           | 0.55 (0.53, 0.58) |  |
| October                                          | 626.8         | 717.5         | 0.87 (0.86, 0.89) | 72.0              | 78.1          | 0.92 (0.91, 0.93) | 24.7             | 20.4          | 1.21 (1.21, 1.22) | 10.8              | 7.7           | 1.40 (1.39, 1.41) | 9.4                | 7.7           | 1.23 (1.19, 1.26) |  |
| November                                         |               |               |                   | 79.2              | 87.8          | 0.90 (0.89, 0.91) | 28.9             | 27.4          | 1.06 (1.05, 1.06) | 14.2              | 11.6          | 1.22 (1.21, 1.22) | 12.2               | 12.6          | 0.96 (0.93, 1.00) |  |
| <b>Well-child visits (with immunizations)</b>    |               |               |                   |                   |               |                   |                  |               |                   |                   |               |                   |                    |               |                   |  |
| Overall                                          | 8.3           | 9.7           | 0.85 (0.75, 0.97) | 51.9              | 56.8          | 0.91 (0.91, 0.92) | 12.4             | 14.9          | 0.83 (0.83, 0.84) | 3.1               | 4.0           | 0.77 (0.76, 0.77) | 3.0                | 4.2           | 0.72 (0.70, 0.75) |  |
| March                                            | 9.4           | 10.6          | 0.89 (0.79, 1.00) | 43.9              | 59.5          | 0.74 (0.73, 0.74) | 7.0              | 13.2          | 0.53 (0.53, 0.53) | 1.4               | 3.3           | 0.42 (0.42, 0.43) | 1.6                | 4.0           | 0.41 (0.41, 0.41) |  |
| April                                            | 8.0           | 8.7           | 0.92 (0.82, 1.05) | 46.6              | 53.0          | 0.88 (0.87, 0.89) | 6.4              | 12.3          | 0.52 (0.52, 0.53) | 0.2               | 2.3           | 0.08 (0.07, 0.08) | 0.3                | 3.0           | 0.09 (0.09, 0.09) |  |
| May                                              | 7.1           | 10.1          | 0.71 (0.63, 0.80) | 49.5              | 53.9          | 0.92 (0.91, 0.93) | 8.5              | 12.0          | 0.71 (0.70, 0.72) | 0.3               | 1.9           | 0.15 (0.15, 0.15) | 0.5                | 2.2           | 0.21 (0.20, 0.22) |  |
| June                                             | 8.6           | 8.6           | 1.00 (0.88, 1.13) | 48.5              | 52.5          | 0.92 (0.91, 0.93) | 8.7              | 11.9          | 0.74 (0.73, 0.74) | 0.5               | 1.7           | 0.28 (0.28, 0.28) | 0.8                | 2.3           | 0.34 (0.33, 0.35) |  |
| July                                             | 9.2           | 8.8           | 1.05 (0.93, 1.19) | 51.9              | 51.9          | 1.00 (0.99, 1.01) | 10.0             | 12.3          | 0.81 (0.81, 0.82) | 0.7               | 1.9           | 0.36 (0.36, 0.36) | 1.1                | 2.4           | 0.47 (0.45, 0.49) |  |
| August                                           | 6.2           | 7.6           | 0.82 (0.71, 0.93) | 48.8              | 51.5          | 0.95 (0.94, 0.96) | 11.4             | 13.6          | 0.84 (0.84, 0.84) | 1.3               | 3.1           | 0.40 (0.40, 0.40) | 2.1                | 3.3           | 0.63 (0.62, 0.65) |  |
| September                                        | 9.3           | 8.9           | 1.05 (0.93, 1.18) | 52.5              | 55.8          | 0.94 (0.94, 0.95) | 10.7             | 12.6          | 0.85 (0.84, 0.85) | 1.0               | 2.3           | 0.42 (0.42, 0.42) | 1.6                | 2.2           | 0.72 (0.68, 0.77) |  |
| October                                          | 8.8           | 10.3          | 0.85 (0.76, 0.97) | 60.5              | 60.7          | 1.00 (0.98, 1.01) | 23.6             | 18.2          | 1.30 (1.30, 1.30) | 10.3              | 6.5           | 1.58 (1.57, 1.59) | 8.9                | 5.8           | 1.53 (1.44, 1.61) |  |
| November                                         |               |               |                   | 68.0              | 71.2          | 0.95 (0.94, 0.96) | 27.8             | 26.9          | 1.03 (1.03, 1.04) | 13.6              | 11.9          | 1.14 (1.13, 1.15) | 11.6               | 11.0          | 1.06 (1.00, 1.11) |  |
| <b>Well-child visits (without immunizations)</b> |               |               |                   |                   |               |                   |                  |               |                   |                   |               |                   |                    |               |                   |  |
| Overall                                          | 606.5         | 706.4         | 0.86 (0.85, 0.87) | 10.3              | 17.7          | 0.58 (0.57, 0.59) | 1.0              | 2.5           | 0.42 (0.42, 0.43) | 0.5               | 1.9           | 0.25 (0.25, 0.26) | 0.5                | 2.1           | 0.25 (0.25, 0.26) |  |
| March                                            | 502.6         | 720.4         | 0.70 (0.69, 0.71) | 9.8               | 18.0          | 0.54 (0.54, 0.55) | 1.2              | 2.6           | 0.45 (0.45, 0.45) | 0.7               | 2.0           | 0.35 (0.35, 0.35) | 0.8                | 2.3           | 0.35 (0.34, 0.35) |  |
| April                                            | 564.0         | 712.0         | 0.79 (0.78, 0.80) | 5.7               | 18.7          | 0.30 (0.30, 0.30) | 0.5              | 2.6           | 0.18 (0.18, 0.18) | 0.1               | 1.7           | 0.03 (0.03, 0.03) | 0.1                | 1.8           | 0.03 (0.03, 0.03) |  |
| May                                              | 635.8         | 722.6         | 0.88 (0.87, 0.89) | 8.1               | 18.5          | 0.44 (0.44, 0.44) | 0.7              | 2.5           | 0.26 (0.26, 0.26) | 0.1               | 1.6           | 0.07 (0.07, 0.07) | 0.1                | 1.7           | 0.08 (0.08, 0.08) |  |
| June                                             | 625.2         | 710.5         | 0.88 (0.87, 0.89) | 9.9               | 18.9          | 0.53 (0.52, 0.53) | 0.9              | 2.5           | 0.34 (0.34, 0.35) | 0.3               | 1.7           | 0.16 (0.16, 0.17) | 0.3                | 1.9           | 0.18 (0.17, 0.18) |  |
| July                                             | 637.1         | 717.4         | 0.89 (0.88, 0.90) | 11.5              | 17.9          | 0.64 (0.64, 0.64) | 1.2              | 2.6           | 0.45 (0.45, 0.46) | 0.5               | 2.2           | 0.21 (0.21, 0.22) | 0.6                | 2.5           | 0.23 (0.23, 0.23) |  |
| August                                           | 636.1         | 721.0         | 0.88 (0.87, 0.90) | 12.0              | 18.0          | 0.67 (0.65, 0.69) | 1.4              | 2.8           | 0.51 (0.51, 0.52) | 0.9               | 3.0           | 0.29 (0.29, 0.29) | 1.0                | 3.4           | 0.29 (0.29, 0.29) |  |
| September                                        | 634.5         | 718.0         | 0.88 (0.87, 0.90) | 13.0              | 19.4          | 0.67 (0.67, 0.67) | 1.4              | 2.8           | 0.49 (0.49, 0.49) | 0.7               | 2.1           | 0.34 (0.34, 0.34) | 0.7                | 2.1           | 0.34 (0.34, 0.35) |  |
| October                                          | 618.1         | 707.2         | 0.87 (0.86, 0.89) | 11.5              | 17.4          | 0.66 (0.66, 0.66) | 1.1              | 2.4           | 0.47 (0.46, 0.47) | 0.5               | 1.7           | 0.29 (0.29, 0.29) | 0.5                | 1.9           | 0.29 (0.28, 0.30) |  |
| November                                         |               |               |                   | 11.3              | 17.0          | 0.66 (0.66, 0.67) | 1.1              | 2.2           | 0.49 (0.48, 0.50) | 0.5               | 1.7           | 0.31 (0.30, 0.31) | 0.6                | 2.0           | 0.29 (0.29, 0.29) |  |
| <b>Sick visits</b>                               |               |               |                   |                   |               |                   |                  |               |                   |                   |               |                   |                    |               |                   |  |
| Overall                                          | 1314.0        | 1123.6        | 1.17 (1.16, 1.18) | 72.8              | 67.7          | 1.07 (1.06, 1.10) | 26.1             | 39.1          | 0.67 (0.66, 0.68) | 24.8              | 32.1          | 0.77 (0.76, 0.78) | 36.1               | 38.3          | 0.94 (0.93, 0.96) |  |
| March                                            | 1271.4        | 1119.1        | 1.14 (1.12, 1.15) | 68.0              | 74.0          | 0.92 (0.91, 0.93) | 32.8             | 42.7          | 0.77 (0.77, 0.77) | 26.8              | 34.6          | 0.77 (0.77, 0.78) | 33.5               | 40.5          | 0.83 (0.83, 0.83) |  |
| April                                            | 1400.4        | 1140.8        | 1.23 (1.21, 1.24) | 78.2              | 73.2          | 1.07 (1.06, 1.08) | 22.0             | 41.4          | 0.53 (0.53, 0.54) | 18.9              | 35.1          | 0.54 (0.53, 0.54) | 28.1               | 41.1          | 0.68 (0.68, 0.69) |  |
| May                                              | 1359.3        | 1119.6        | 1.21 (1.20, 1.23) | 80.6              | 69.4          | 1.16 (1.14, 1.18) | 23.5             | 39.1          | 0.60 (0.60, 0.61) | 20.9              | 34.1          | 0.61 (0.60, 0.62) | 31.4               | 41.2          | 0.76 (0.76, 0.76) |  |

|   |           |        |        |                   |      |      |                   |      |      |                   |      |      |                   |      |      |                   |
|---|-----------|--------|--------|-------------------|------|------|-------------------|------|------|-------------------|------|------|-------------------|------|------|-------------------|
| 1 | June      | 1322.9 | 1119.6 | 1.18 (1.17, 1.20) | 74.9 | 66.0 | 1.13 (1.12, 1.15) | 23.9 | 36.4 | 0.66 (0.65, 0.67) | 22.2 | 32.0 | 0.70 (0.68, 0.71) | 33.8 | 38.5 | 0.88 (0.88, 0.88) |
| 2 | July      | 1298.3 | 1121.3 | 1.16 (1.14, 1.17) | 74.5 | 59.6 | 1.25 (1.22, 1.28) | 25.3 | 32.9 | 0.77 (0.75, 0.78) | 24.5 | 29.5 | 0.83 (0.82, 0.84) | 37.9 | 35.1 | 1.08 (1.05, 1.11) |
| 3 | August    | 1287.9 | 1136.8 | 1.13 (1.12, 1.15) | 67.1 | 55.7 | 1.21 (1.17, 1.24) | 24.8 | 29.6 | 0.84 (0.83, 0.85) | 25.0 | 29.1 | 0.86 (0.85, 0.86) | 38.9 | 35.9 | 1.08 (1.05, 1.11) |
| 4 | September | 1290.2 | 1134.6 | 1.14 (1.12, 1.15) | 71.7 | 67.2 | 1.07 (1.04, 1.09) | 30.5 | 35.9 | 0.85 (0.83, 0.87) | 31.2 | 30.4 | 1.02 (1.00, 1.05) | 40.5 | 39.6 | 1.02 (1.02, 1.02) |
| 5 | October   | 1286.5 | 1149.6 | 1.12 (1.11, 1.13) | 70.4 | 67.7 | 1.04 (1.02, 1.06) | 25.8 | 40.6 | 0.63 (0.63, 0.64) | 27.8 | 30.8 | 0.90 (0.89, 0.92) | 41.1 | 38.3 | 1.07 (1.07, 1.08) |
| 6 | November  | -      | -      | -                 | 70.4 | 73.5 | 0.96 (0.95, 0.97) | 25.0 | 46.9 | 0.53 (0.53, 0.54) | 26.2 | 34.3 | 0.76 (0.76, 0.76) | 41.4 | 40.0 | 1.04 (1.03, 1.04) |

5  
6  
7  
8  
9  
10  
11  
12  
13  
14  
15  
16  
17  
18  
19  
20  
21  
22  
23  
24  
25  
26  
27  
28  
29  
30  
31  
32  
33  
34  
35  
36  
37  
38  
39  
40  
41  
42  
43  
44  
45  
46  
47

Confidential



**eTable 4. MANITOBA: Observed, expected and adjusted relative change (RR, 95% CI) in primary care, well-child, and sick visits in Ontario, during the post-pandemic era, by age group.** All rates are weekly visit rates per 1000 population.

|                                                  | Observed rate | Expected rate | RR (95% CI)        | Observed rate     | Expected rate | RR (95% CI)       | Observed rate    | Expected rate | RR (95% CI)       | Observed rate     | Expected rate | RR (95% CI)       | Observed rate      | Expected rate | RR (95% CI)       |  |
|--------------------------------------------------|---------------|---------------|--------------------|-------------------|---------------|-------------------|------------------|---------------|-------------------|-------------------|---------------|-------------------|--------------------|---------------|-------------------|--|
|                                                  | Newborns      |               |                    | Age 29 - 365 days |               |                   | Age 1 to 5 years |               |                   | Age 6 to 12 years |               |                   | Age 13 to 17 years |               |                   |  |
| <b>All primary care visits</b>                   |               |               |                    |                   |               |                   |                  |               |                   |                   |               |                   |                    |               |                   |  |
| Overall                                          | 1251.6        | 1146.2        | 1.09 (1.06, 1.13)  | 101.0             | 110.2         | 0.92 (0.91, 0.93) | 39.2             | 54.4          | 0.72 (0.71, 0.73) | 31.1              | 38.1          | 0.82 (0.80, 0.84) | 39.1               | 43.7          | 0.90 (0.88, 0.91) |  |
| March                                            | 1082.6        | 1143.4        | 0.95 (0.92, 0.98)  | 101.0             | 118.5         | 0.85 (0.84, 0.86) | 44.1             | 56.8          | 0.78 (0.78, 0.78) | 32.5              | 40.4          | 0.81 (0.80, 0.81) | 39.3               | 46.0          | 0.86 (0.85, 0.86) |  |
| April                                            | 1320.4        | 1160.2        | 1.14 (1.10, 1.18)  | 99.1              | 115.2         | 0.86 (0.85, 0.87) | 27.2             | 55.0          | 0.50 (0.49, 0.50) | 20.7              | 39.0          | 0.53 (0.52, 0.54) | 28.8               | 46.4          | 0.62 (0.61, 0.63) |  |
| May                                              | 1391.8        | 1184.7        | 1.17 (1.13, 1.22)  | 98.6              | 110.9         | 0.89 (0.88, 0.90) | 33.3             | 52.9          | 0.63 (0.62, 0.64) | 25.2              | 38.1          | 0.66 (0.66, 0.67) | 32.1               | 45.3          | 0.71 (0.71, 0.71) |  |
| June                                             | 1241.6        | 1126.5        | 1.10 (1.07, 1.14)  | 98.8              | 106.6         | 0.93 (0.91, 0.94) | 35.8             | 50.5          | 0.71 (0.70, 0.72) | 27.3              | 36.5          | 0.75 (0.71, 0.79) | 34.5               | 40.9          | 0.84 (0.84, 0.85) |  |
| July                                             | 1220.2        | 1120.2        | 1.09 (1.05, 1.13)  | 101.0             | 100.5         | 1.00 (1.00, 1.01) | 40.1             | 45.8          | 0.87 (0.87, 0.88) | 30.2              | 33.5          | 0.90 (0.89, 0.92) | 40.1               | 38.0          | 1.06 (1.03, 1.09) |  |
| August                                           | 1190.2        | 1122.8        | 1.06 (1.02, 1.10)  | 94.9              | 98.4          | 0.96 (0.95, 0.98) | 37.3             | 45.9          | 0.81 (0.80, 0.82) | 32.5              | 35.5          | 0.92 (0.90, 0.93) | 42.5               | 40.9          | 1.04 (1.02, 1.06) |  |
| September                                        | 1213.1        | 1180.2        | 1.03 (1.00, 1.06)  | 100.0             | 110.2         | 0.91 (0.90, 0.92) | 37.5             | 51.2          | 0.73 (0.72, 0.74) | 33.7              | 37.4          | 0.90 (0.87, 0.93) | 41.7               | 45.3          | 0.92 (0.92, 0.93) |  |
| October                                          | 1289.8        | 1182.4        | 1.09 (1.05, 1.13)  | 105.4             | 112.0         | 0.94 (0.94, 0.94) | 45.5             | 59.9          | 0.76 (0.76, 0.77) | 38.9              | 39.4          | 0.99 (0.98, 1.00) | 46.3               | 46.1          | 1.01 (1.00, 1.01) |  |
| November                                         | 1356.5        | 1178.5        | 1.15 (1.11, 1.19)  | 112.2             | 119.6         | 0.94 (0.93, 0.94) | 52.6             | 66.4          | 0.79 (0.78, 0.80) | 40.0              | 43.1          | 0.93 (0.92, 0.94) | 47.7               | 47.4          | 1.01 (1.00, 1.01) |  |
| <b>Well-child visits</b>                         |               |               |                    |                   |               |                   |                  |               |                   |                   |               |                   |                    |               |                   |  |
| Overall                                          | 643.1         | 657.5         | 0.98 (0.94, 1.02)  | 53.3              | 57.2          | 0.93 (0.92, 0.94) | 13.9             | 15.5          | 0.90 (0.88, 0.92) | 6.5               | 6.9           | 0.95 (0.92, 0.97) | 4.6                | 4.6           | 0.99 (0.96, 1.01) |  |
| March                                            | 544.5         | 634.2         | 0.86 (0.82, 0.90)  | 48.0              | 58.6          | 0.82 (0.82, 0.82) | 8.7              | 13.3          | 0.66 (0.64, 0.67) | 3.1               | 5.9           | 0.53 (0.52, 0.53) | 2.4                | 4.1           | 0.59 (0.58, 0.60) |  |
| April                                            | 648.3         | 654.2         | 0.99 (0.95, 1.04)  | 51.2              | 55.3          | 0.93 (0.92, 0.93) | 7.2              | 13.3          | 0.54 (0.53, 0.56) | 1.7               | 5.4           | 0.31 (0.30, 0.32) | 1.1                | 3.6           | 0.29 (0.29, 0.29) |  |
| May                                              | 648.5         | 665.0         | 0.98 (0.93, 1.02)  | 51.3              | 55.7          | 0.92 (0.91, 0.93) | 10.2             | 13.2          | 0.78 (0.77, 0.79) | 3.4               | 5.4           | 0.63 (0.60, 0.66) | 1.9                | 3.7           | 0.52 (0.52, 0.53) |  |
| June                                             | 672.3         | 657.7         | 1.02 (0.98, 1.07)  | 51.6              | 55.3          | 0.93 (0.91, 0.95) | 11.0             | 13.5          | 0.81 (0.81, 0.82) | 4.2               | 5.4           | 0.78 (0.77, 0.79) | 3.0                | 3.8           | 0.78 (0.75, 0.81) |  |
| July                                             | 672.1         | 665.0         | 1.01 (0.97, 1.06)  | 52.3              | 52.9          | 0.99 (0.98, 1.00) | 11.9             | 12.5          | 0.95 (0.95, 0.95) | 4.9               | 5.7           | 0.86 (0.86, 0.87) | 4.0                | 4.5           | 0.88 (0.87, 0.90) |  |
| August                                           | 615.6         | 660.8         | 0.93 (0.89, 0.97)  | 50.7              | 54.5          | 0.93 (0.92, 0.94) | 12.8             | 14.8          | 0.87 (0.86, 0.87) | 5.9               | 7.5           | 0.79 (0.78, 0.80) | 4.9                | 5.6           | 0.89 (0.86, 0.91) |  |
| September                                        | 668.3         | 679.2         | 0.98 (0.94, 1.03)  | 53.0              | 58.6          | 0.90 (0.90, 0.91) | 12.1             | 14.8          | 0.81 (0.81, 0.82) | 5.2               | 6.3           | 0.83 (0.81, 0.85) | 3.7                | 4.1           | 0.90 (0.86, 0.93) |  |
| October                                          | 659.0         | 670.1         | 0.98 (0.94, 1.03)  | 57.8              | 59.9          | 0.96 (0.96, 0.97) | 22.9             | 20.9          | 1.10 (1.08, 1.12) | 14.1              | 10.1          | 1.40 (1.38, 1.41) | 9.3                | 6.2           | 1.50 (1.48, 1.52) |  |
| November                                         | 698.8         | 671.0         | 1.04 (0.99, 1.09)  | 66.1              | 66.0          | 1.00 (1.00, 1.01) | 31.0             | 24.3          | 1.28 (1.24, 1.31) | 18.1              | 11.3          | 1.60 (1.58, 1.63) | 11.8               | 6.6           | 1.80 (1.75, 1.84) |  |
| <b>Well-child visits (with immunizations)</b>    |               |               |                    |                   |               |                   |                  |               |                   |                   |               |                   |                    |               |                   |  |
| Overall                                          | 1.1           | 1.3           | 0.84 (0.31, 2.29)  | 31.4              | 39.1          | 0.80 (0.79, 0.81) | 9.9              | 10.7          | 0.93 (0.91, 0.95) | 3.7               | 3.1           | 1.19 (1.12, 1.27) | 2.5                | 1.9           | 1.34 (1.28, 1.40) |  |
| March                                            | 1.3           | 2.0           | 0.63 (0.28, 1.43)  | 27.6              | 35.5          | 0.78 (0.76, 0.79) | 5.3              | 8.2           | 0.64 (0.62, 0.66) | 0.8               | 1.4           | 0.60 (0.55, 0.67) | 0.7                | 0.9           | 0.70 (0.68, 0.72) |  |
| April                                            | 1.6           | 1.5           | 1.10 (0.45, 2.69)  | 28.0              | 30.4          | 0.92 (0.91, 0.94) | 4.2              | 7.9           | 0.53 (0.52, 0.54) | 0.3               | 1.2           | 0.26 (0.25, 0.27) | 0.3                | 0.8           | 0.39 (0.37, 0.41) |  |
| May                                              | 1.2           | 0.4           | 2.95 (0.66, 13.11) | 29.2              | 32.1          | 0.91 (0.90, 0.92) | 6.1              | 7.6           | 0.80 (0.80, 0.80) | 0.7               | 1.1           | 0.61 (0.54, 0.69) | 0.5                | 0.8           | 0.65 (0.60, 0.70) |  |
| June                                             | 2.3           | 1.3           | 1.70 (0.68, 4.23)  | 27.9              | 34.9          | 0.80 (0.79, 0.81) | 6.2              | 8.1           | 0.76 (0.76, 0.77) | 1.0               | 1.2           | 0.84 (0.83, 0.86) | 0.8                | 0.9           | 0.85 (0.82, 0.87) |  |
| July                                             | 0.8           | 1.0           | 0.74 (0.28, 1.99)  | 29.3              | 34.6          | 0.85 (0.83, 0.86) | 6.8              | 7.5           | 0.90 (0.87, 0.93) | 1.2               | 1.1           | 1.13 (1.07, 1.19) | 1.2                | 0.8           | 1.40 (1.33, 1.47) |  |
| August                                           | 0.0           | 1.2           | 0.00 (0.00, 0.00)  | 28.1              | 35.5          | 0.79 (0.78, 0.80) | 7.6              | 9.0           | 0.85 (0.85, 0.85) | 1.4               | 1.4           | 1.03 (1.02, 1.04) | 1.4                | 1.0           | 1.43 (1.38, 1.48) |  |
| September                                        | 0.0           | 1.9           | 0.00 (0.00, 0.00)  | 29.7              | 38.2          | 0.78 (0.75, 0.80) | 7.7              | 9.1           | 0.85 (0.84, 0.85) | 2.1               | 1.7           | 1.22 (1.18, 1.25) | 1.2                | 1.1           | 1.15 (1.11, 1.20) |  |
| October                                          | 0.0           | 1.4           | 0.00 (0.00, 0.00)  | 37.6              | 46.4          | 0.81 (0.81, 0.81) | 20.2             | 17.1          | 1.18 (1.16, 1.20) | 12.0              | 8.1           | 1.48 (1.43, 1.53) | 7.3                | 4.7           | 1.56 (1.52, 1.60) |  |
| November                                         | 2.7           | 1.5           | 1.76 (0.70, 4.45)  | 47.2              | 57.0          | 0.83 (0.82, 0.83) | 28.1             | 21.0          | 1.34 (1.32, 1.36) | 15.8              | 10.0          | 1.59 (1.55, 1.62) | 10.3               | 5.3           | 1.93 (1.92, 1.94) |  |
| <b>Well-child visits (without immunizations)</b> |               |               |                    |                   |               |                   |                  |               |                   |                   |               |                   |                    |               |                   |  |
| Overall                                          | 642.0         | 656.3         | 0.98 (0.94, 1.02)  | 21.9              | 21.4          | 1.02 (1.01, 1.04) | 4.0              | 4.9           | 0.82 (0.79, 0.85) | 2.8               | 3.9           | 0.72 (0.71, 0.74) | 2.1                | 2.8           | 0.73 (0.71, 0.75) |  |
| March                                            | 543.2         | 632.1         | 0.86 (0.82, 0.90)  | 20.4              | 24.1          | 0.85 (0.84, 0.85) | 3.5              | 5.0           | 0.69 (0.69, 0.69) | 2.3               | 4.2           | 0.54 (0.54, 0.55) | 1.8                | 3.0           | 0.59 (0.58, 0.61) |  |
| April                                            | 646.6         | 652.7         | 0.99 (0.95, 1.04)  | 23.3              | 24.0          | 0.97 (0.97, 0.97) | 3.0              | 5.2           | 0.58 (0.55, 0.62) | 1.4               | 3.8           | 0.36 (0.35, 0.36) | 0.7                | 2.7           | 0.28 (0.27, 0.29) |  |
| May                                              | 647.2         | 664.8         | 0.97 (0.93, 1.02)  | 22.0              | 23.6          | 0.93 (0.93, 0.93) | 4.2              | 5.3           | 0.78 (0.75, 0.81) | 2.7               | 3.8           | 0.70 (0.69, 0.72) | 1.4                | 2.7           | 0.53 (0.53, 0.53) |  |
| June                                             | 670.0         | 656.4         | 1.02 (0.98, 1.07)  | 23.7              | 22.4          | 1.06 (1.03, 1.08) | 4.8              | 5.2           | 0.92 (0.90, 0.95) | 3.2               | 3.8           | 0.85 (0.83, 0.86) | 2.2                | 2.7           | 0.81 (0.78, 0.84) |  |
| July                                             | 671.3         | 664.0         | 1.01 (0.97, 1.06)  | 23.0              | 20.4          | 1.13 (1.13, 1.13) | 5.2              | 4.9           | 1.06 (1.02, 1.11) | 3.7               | 4.1           | 0.89 (0.88, 0.90) | 2.8                | 3.3           | 0.84 (0.83, 0.85) |  |
| August                                           | 615.6         | 659.6         | 0.93 (0.89, 0.98)  | 22.6              | 21.2          | 1.07 (1.05, 1.08) | 5.2              | 5.6           | 0.92 (0.90, 0.95) | 4.5               | 5.5           | 0.82 (0.80, 0.84) | 3.5                | 4.2           | 0.83 (0.82, 0.84) |  |
| September                                        | 668.3         | 677.2         | 0.99 (0.95, 1.03)  | 23.2              | 22.7          | 1.03 (1.02, 1.03) | 4.4              | 5.7           | 0.77 (0.77, 0.77) | 3.2               | 4.3           | 0.73 (0.71, 0.76) | 2.4                | 2.9           | 0.84 (0.79, 0.89) |  |
| October                                          | 659.0         | 668.7         | 0.99 (0.94, 1.03)  | 20.2              | 19.8          | 1.02 (1.02, 1.02) | 2.7              | 4.2           | 0.65 (0.64, 0.65) | 2.1               | 3.5           | 0.61 (0.61, 0.61) | 2.0                | 2.4           | 0.82 (0.80, 0.83) |  |
| November                                         | 696.1         | 669.4         | 1.04 (0.99, 1.09)  | 19.0              | 19.0          | 1.00 (0.97, 1.02) | 2.9              | 4.1           | 0.70 (0.67, 0.74) | 2.3               | 3.4           | 0.68 (0.66, 0.69) | 1.6                | 2.3           | 0.68 (0.67, 0.69) |  |
| <b>Sick visits</b>                               |               |               |                    |                   |               |                   |                  |               |                   |                   |               |                   |                    |               |                   |  |
| Overall                                          | 608.5         | 488.8         | 1.24 (1.18, 1.31)  | 47.7              | 53.0          | 0.90 (0.89, 0.91) | 25.3             | 39.0          | 0.65 (0.64, 0.66) | 24.6              | 31.2          | 0.79 (0.77, 0.81) | 34.6               | 39.0          | 0.89 (0.87, 0.90) |  |
| March                                            | 538.2         | 509.9         | 1.06 (1.00, 1.11)  | 53.0              | 59.9          | 0.89 (0.87, 0.90) | 35.4             | 43.4          | 0.81 (0.81, 0.82) | 29.4              | 34.4          | 0.85 (0.85, 0.86) | 36.9               | 41.9          | 0.88 (0.87, 0.89) |  |
| April                                            | 672.2         | 506.3         | 1.33 (1.26, 1.40)  | 47.9              | 59.9          | 0.80 (0.78, 0.82) | 20.0             | 41.6          | 0.48 (0.48, 0.48) | 19.0              | 33.5          | 0.57 (0.55, 0.58) | 27.7               | 42.8          | 0.65 (0.64, 0.66) |  |
| May                                              | 743.3         | 520.1         | 1.43 (1.36, 1.51)  | 47.3              | 55.1          | 0.86 (0.86, 0.86) | 23.1             | 39.7          | 0.58 (0.57, 0.59) | 21.8              | 32.7          | 0.67 (0.66, 0.68) | 30.2               | 41.6          | 0.73 (0.72, 0.73) |  |

|   |           |       |       |                   |      |      |                   |      |      |                   |      |      |                   |      |      |                   |
|---|-----------|-------|-------|-------------------|------|------|-------------------|------|------|-------------------|------|------|-------------------|------|------|-------------------|
| 1 | June      | 569.4 | 468.4 | 1.22 (1.15, 1.28) | 47.3 | 51.2 | 0.92 (0.91, 0.93) | 24.7 | 37.0 | 0.67 (0.65, 0.69) | 23.1 | 31.0 | 0.75 (0.70, 0.79) | 31.6 | 37.0 | 0.85 (0.85, 0.86) |
| 2 | July      | 548.1 | 454.6 | 1.21 (1.14, 1.27) | 48.7 | 47.7 | 1.02 (1.01, 1.03) | 28.1 | 33.4 | 0.84 (0.84, 0.85) | 25.3 | 27.9 | 0.91 (0.89, 0.93) | 36.2 | 33.5 | 1.08 (1.06, 1.11) |
| 3 | August    | 574.6 | 461.5 | 1.25 (1.18, 1.32) | 44.2 | 43.9 | 1.01 (0.98, 1.03) | 24.5 | 31.4 | 0.78 (0.77, 0.79) | 26.6 | 28.1 | 0.95 (0.93, 0.96) | 37.5 | 35.3 | 1.06 (1.05, 1.07) |
| 4 | September | 544.8 | 500.9 | 1.09 (1.03, 1.14) | 47.0 | 51.6 | 0.91 (0.89, 0.93) | 25.4 | 36.5 | 0.70 (0.69, 0.71) | 28.4 | 31.2 | 0.91 (0.88, 0.95) | 38.0 | 41.2 | 0.92 (0.91, 0.93) |
| 5 | October   | 630.9 | 512.6 | 1.23 (1.17, 1.30) | 47.6 | 52.1 | 0.91 (0.91, 0.92) | 22.6 | 39.5 | 0.57 (0.57, 0.57) | 24.8 | 29.6 | 0.84 (0.82, 0.85) | 37.0 | 39.8 | 0.93 (0.92, 0.93) |
| 6 | November  | 657.8 | 507.7 | 1.30 (1.23, 1.37) | 46.0 | 53.6 | 0.86 (0.85, 0.86) | 21.5 | 42.7 | 0.50 (0.50, 0.51) | 21.9 | 32.1 | 0.68 (0.67, 0.70) | 35.8 | 40.9 | 0.88 (0.86, 0.89) |

5  
6  
7  
8  
9  
10  
11  
12  
13  
14  
15  
16  
17  
18  
19  
20  
21  
22  
23  
24  
25  
26  
27  
28  
29  
30  
31  
32  
33  
34  
35  
36  
37  
38  
39  
40  
41  
42  
43  
44  
45  
46  
47

Confidential

eTable 5. ONTARIO: Observed, expected and adjusted relative change (RR, 95% CI) in primary care (overall, virtual, in-person), well-child, and sick visits in Ontario, during the post-pandemic era, by material deprivation index. All rates are weekly visit rates per 1000 population and do not include newborns.

|                                                 | Observed rate       | Expected rate | RR (95% CI)       | Observed rate | Expected rate | RR (95% CI)       | Observed rate | Expected rate | RR (95% CI)       | Observed rate | Expected rate | RR (95% CI)       | Observed rate      | Expected rate | RR (95% CI)       |
|-------------------------------------------------|---------------------|---------------|-------------------|---------------|---------------|-------------------|---------------|---------------|-------------------|---------------|---------------|-------------------|--------------------|---------------|-------------------|
|                                                 | Q1 (least deprived) |               |                   | Q2            |               |                   | Q3            |               |                   | Q4            |               |                   | Q5 (most deprived) |               |                   |
| <b>All primary care visits</b>                  |                     |               |                   |               |               |                   |               |               |                   |               |               |                   |                    |               |                   |
| Overall                                         | 42.5                | 51.2          | 0.83 (0.80, 0.86) | 40.6          | 50.6          | 0.80 (0.78, 0.83) | 39.3          | 49.4          | 0.79 (0.77, 0.82) | 38.6          | 49.4          | 0.78 (0.76, 0.80) | 36.38              | 47.82         | 0.76 (0.74, 0.78) |
| March                                           | 39.3                | 52.6          | 0.75 (0.74, 0.75) | 38.5          | 52.6          | 0.73 (0.73, 0.74) | 38.3          | 51.8          | 0.74 (0.73, 0.75) | 38.7          | 52.3          | 0.74 (0.73, 0.75) | 37.92              | 51.41         | 0.74 (0.73, 0.75) |
| April                                           | 31.3                | 51.4          | 0.61 (0.60, 0.62) | 29.9          | 51.5          | 0.58 (0.57, 0.59) | 29.4          | 50.8          | 0.58 (0.57, 0.59) | 29.5          | 51.1          | 0.58 (0.57, 0.58) | 27.82              | 50.07         | 0.56 (0.55, 0.56) |
| May                                             | 35.0                | 49.9          | 0.70 (0.68, 0.72) | 33.4          | 49.7          | 0.67 (0.66, 0.69) | 32.4          | 48.9          | 0.66 (0.65, 0.68) | 32.4          | 49.2          | 0.66 (0.65, 0.67) | 30.64              | 48.17         | 0.64 (0.63, 0.64) |
| June                                            | 36.7                | 48.0          | 0.76 (0.74, 0.79) | 34.9          | 47.6          | 0.73 (0.71, 0.75) | 34.1          | 46.6          | 0.73 (0.72, 0.75) | 33.9          | 46.2          | 0.73 (0.72, 0.75) | 31.96              | 44.47         | 0.72 (0.71, 0.73) |
| July                                            | 40.3                | 45.8          | 0.88 (0.85, 0.91) | 38.8          | 45.2          | 0.86 (0.83, 0.89) | 37.7          | 44.1          | 0.86 (0.83, 0.88) | 37.1          | 43.7          | 0.85 (0.83, 0.87) | 34.92              | 41.97         | 0.83 (0.82, 0.85) |
| August                                          | 41.7                | 46.8          | 0.89 (0.83, 0.96) | 40.1          | 45.7          | 0.88 (0.83, 0.93) | 38.9          | 44.3          | 0.88 (0.83, 0.92) | 38.0          | 44.0          | 0.86 (0.83, 0.90) | 35.58              | 42.45         | 0.84 (0.81, 0.87) |
| September                                       | 46.0                | 47.4          | 0.97 (0.94, 1.00) | 44.1          | 47.1          | 0.94 (0.91, 0.97) | 43.0          | 46.5          | 0.93 (0.90, 0.95) | 42.2          | 47.2          | 0.89 (0.87, 0.92) | 40.14              | 46.43         | 0.86 (0.85, 0.88) |
| October                                         | 55.7                | 53.3          | 1.04 (1.02, 1.07) | 52.4          | 52.5          | 1.00 (0.98, 1.02) | 49.5          | 51.1          | 0.97 (0.95, 0.99) | 47.3          | 51.2          | 0.92 (0.90, 0.95) | 44.17              | 49.81         | 0.89 (0.87, 0.91) |
| November                                        | 59.3                | 64.3          | 0.92 (0.88, 0.97) | 55.8          | 62.4          | 0.89 (0.86, 0.93) | 52.4          | 60.4          | 0.87 (0.84, 0.90) | 50.0          | 59.4          | 0.84 (0.81, 0.87) | 45.51              | 56.37         | 0.81 (0.78, 0.83) |
| <b>Well-child visits</b>                        |                     |               |                   |               |               |                   |               |               |                   |               |               |                   |                    |               |                   |
| Overall                                         | 9.8                 | 13.1          | 0.75 (0.68, 0.82) | 9.3           | 12.6          | 0.74 (0.67, 0.81) | 8.8           | 12.1          | 0.73 (0.66, 0.80) | 8.7           | 12.1          | 0.72 (0.66, 0.79) | 7.82               | 11.32         | 0.69 (0.63, 0.76) |
| March                                           | 6.2                 | 12.2          | 0.51 (0.47, 0.55) | 6.1           | 11.7          | 0.53 (0.49, 0.57) | 6.1           | 11.7          | 0.53 (0.49, 0.56) | 6.4           | 12.0          | 0.54 (0.51, 0.56) | 6.28               | 11.88         | 0.53 (0.51, 0.55) |
| April                                           | 4.4                 | 11.2          | 0.39 (0.36, 0.43) | 4.4           | 10.9          | 0.40 (0.37, 0.44) | 4.4           | 10.7          | 0.41 (0.38, 0.45) | 4.8           | 11.0          | 0.44 (0.41, 0.47) | 4.25               | 10.90         | 0.39 (0.37, 0.41) |
| May                                             | 5.5                 | 11.1          | 0.49 (0.44, 0.55) | 5.4           | 10.4          | 0.52 (0.46, 0.59) | 5.5           | 10.1          | 0.55 (0.48, 0.62) | 5.6           | 10.4          | 0.54 (0.48, 0.61) | 5.25               | 10.26         | 0.51 (0.46, 0.57) |
| June                                            | 5.9                 | 11.4          | 0.52 (0.48, 0.55) | 5.8           | 10.6          | 0.55 (0.50, 0.61) | 5.8           | 10.2          | 0.58 (0.52, 0.64) | 6.2           | 10.2          | 0.61 (0.54, 0.68) | 5.70               | 10.18         | 0.56 (0.50, 0.62) |
| July                                            | 7.0                 | 12.4          | 0.56 (0.55, 0.57) | 6.9           | 11.8          | 0.58 (0.56, 0.60) | 6.9           | 11.3          | 0.61 (0.59, 0.63) | 7.0           | 11.4          | 0.61 (0.58, 0.65) | 6.72               | 11.32         | 0.59 (0.55, 0.64) |
| August                                          | 8.3                 | 14.0          | 0.59 (0.55, 0.64) | 8.1           | 13.3          | 0.61 (0.58, 0.65) | 8.0           | 12.6          | 0.63 (0.60, 0.67) | 8.1           | 12.6          | 0.64 (0.60, 0.69) | 7.36               | 12.02         | 0.61 (0.56, 0.67) |
| September                                       | 7.8                 | 11.2          | 0.70 (0.62, 0.79) | 7.5           | 10.8          | 0.70 (0.62, 0.78) | 7.6           | 10.5          | 0.72 (0.64, 0.82) | 7.8           | 10.6          | 0.74 (0.65, 0.83) | 7.23               | 9.92          | 0.73 (0.65, 0.82) |
| October                                         | 20.5                | 14.4          | 1.42 (1.34, 1.51) | 18.4          | 14.3          | 1.28 (1.20, 1.37) | 16.4          | 13.5          | 1.21 (1.15, 1.28) | 15.3          | 13.2          | 1.16 (1.10, 1.22) | 13.34              | 11.80         | 1.13 (1.06, 1.20) |
| November                                        | 25.0                | 19.3          | 1.29 (1.12, 1.50) | 22.7          | 18.7          | 1.21 (1.06, 1.38) | 20.2          | 17.6          | 1.15 (1.00, 1.31) | 18.5          | 16.7          | 1.11 (0.97, 1.27) | 15.37              | 13.83         | 1.11 (0.98, 1.26) |
| <b>Well-child visits (with immunization)</b>    |                     |               |                   |               |               |                   |               |               |                   |               |               |                   |                    |               |                   |
| Overall                                         | 8.7                 | 10.0          | 0.87 (0.76, 0.99) | 8.1           | 9.5           | 0.86 (0.75, 0.98) | 7.7           | 9.2           | 0.83 (0.72, 0.95) | 7.6           | 9.4           | 0.81 (0.71, 0.93) | 6.82               | 8.82          | 0.77 (0.67, 0.89) |
| March                                           | 4.8                 | 8.6           | 0.56 (0.53, 0.61) | 4.8           | 8.5           | 0.57 (0.53, 0.61) | 4.8           | 8.6           | 0.56 (0.53, 0.59) | 5.2           | 9.2           | 0.56 (0.54, 0.58) | 5.14               | 9.10          | 0.57 (0.55, 0.58) |
| April                                           | 4.0                 | 7.4           | 0.54 (0.48, 0.61) | 4.0           | 7.4           | 0.54 (0.48, 0.60) | 4.0           | 7.4           | 0.53 (0.48, 0.60) | 4.3           | 7.8           | 0.55 (0.51, 0.60) | 3.88               | 7.78          | 0.50 (0.47, 0.53) |
| May                                             | 4.8                 | 7.2           | 0.67 (0.58, 0.79) | 4.8           | 7.1           | 0.68 (0.58, 0.80) | 4.8           | 7.0           | 0.70 (0.59, 0.82) | 5.0           | 7.3           | 0.69 (0.59, 0.81) | 4.66               | 7.09          | 0.66 (0.57, 0.76) |
| June                                            | 5.0                 | 7.2           | 0.69 (0.61, 0.78) | 4.9           | 7.0           | 0.71 (0.61, 0.82) | 5.0           | 6.8           | 0.73 (0.62, 0.86) | 5.2           | 7.0           | 0.75 (0.63, 0.90) | 4.89               | 6.64          | 0.74 (0.61, 0.90) |
| July                                            | 5.7                 | 7.3           | 0.78 (0.69, 0.88) | 5.6           | 7.3           | 0.78 (0.68, 0.89) | 5.7           | 7.0           | 0.80 (0.70, 0.93) | 5.8           | 7.2           | 0.80 (0.68, 0.94) | 5.61               | 6.82          | 0.82 (0.69, 0.98) |
| August                                          | 6.7                 | 8.5           | 0.78 (0.75, 0.82) | 6.5           | 8.2           | 0.79 (0.74, 0.84) | 6.4           | 8.0           | 0.80 (0.74, 0.86) | 6.6           | 8.3           | 0.79 (0.72, 0.87) | 5.94               | 8.02          | 0.74 (0.67, 0.82) |
| September                                       | 6.3                 | 7.6           | 0.83 (0.72, 0.96) | 6.0           | 7.4           | 0.81 (0.70, 0.95) | 6.1           | 7.4           | 0.83 (0.71, 0.97) | 6.3           | 7.7           | 0.82 (0.71, 0.95) | 5.90               | 7.45          | 0.79 (0.68, 0.91) |
| October                                         | 19.4                | 13.0          | 1.48 (1.31, 1.68) | 17.2          | 12.2          | 1.40 (1.25, 1.57) | 15.1          | 11.7          | 1.30 (1.18, 1.43) | 14.1          | 11.5          | 1.22 (1.11, 1.35) | 12.24              | 10.75         | 1.14 (1.01, 1.29) |
| November                                        | 23.7                | 21.2          | 1.12 (0.90, 1.40) | 21.4          | 19.3          | 1.11 (0.90, 1.38) | 19.0          | 18.0          | 1.05 (0.85, 1.30) | 17.3          | 17.2          | 1.00 (0.81, 1.24) | 14.25              | 15.26         | 0.93 (0.76, 1.15) |
| <b>Well-child visits (without immunization)</b> |                     |               |                   |               |               |                   |               |               |                   |               |               |                   |                    |               |                   |
| Overall                                         | 1.1                 | 3.2           | 0.36 (0.33, 0.38) | 1.1           | 3.1           | 0.36 (0.34, 0.39) | 1.1           | 2.9           | 0.39 (0.36, 0.42) | 1.1           | 2.7           | 0.41 (0.38, 0.44) | 1.00               | 2.35          | 0.43 (0.40, 0.46) |
| March                                           | 1.4                 | 3.2           | 0.42 (0.41, 0.43) | 1.3           | 3.2           | 0.42 (0.41, 0.44) | 1.3           | 3.0           | 0.45 (0.43, 0.46) | 1.3           | 2.9           | 0.44 (0.42, 0.46) | 1.14               | 2.55          | 0.45 (0.42, 0.47) |
| April                                           | 0.4                 | 3.0           | 0.15 (0.14, 0.16) | 0.4           | 3.0           | 0.14 (0.13, 0.15) | 0.4           | 2.8           | 0.16 (0.15, 0.17) | 0.5           | 2.6           | 0.17 (0.16, 0.18) | 0.37               | 2.32          | 0.16 (0.15, 0.17) |
| May                                             | 0.6                 | 3.0           | 0.21 (0.20, 0.23) | 0.6           | 2.8           | 0.23 (0.21, 0.25) | 0.7           | 2.6           | 0.25 (0.23, 0.28) | 0.6           | 2.5           | 0.25 (0.23, 0.27) | 0.59               | 2.22          | 0.27 (0.25, 0.29) |
| June                                            | 0.9                 | 3.1           | 0.29 (0.28, 0.30) | 0.9           | 2.9           | 0.31 (0.29, 0.33) | 0.9           | 2.8           | 0.32 (0.30, 0.33) | 1.0           | 2.6           | 0.37 (0.34, 0.39) | 0.81               | 2.24          | 0.36 (0.34, 0.38) |
| July                                            | 1.3                 | 3.4           | 0.37 (0.36, 0.39) | 1.2           | 3.5           | 0.35 (0.32, 0.37) | 1.2           | 3.3           | 0.37 (0.34, 0.41) | 1.2           | 3.0           | 0.40 (0.37, 0.44) | 1.10               | 2.64          | 0.42 (0.39, 0.45) |
| August                                          | 1.6                 | 4.3           | 0.39 (0.33, 0.45) | 1.6           | 4.2           | 0.39 (0.33, 0.45) | 1.6           | 3.8           | 0.42 (0.36, 0.49) | 1.5           | 3.5           | 0.43 (0.37, 0.51) | 1.41               | 3.03          | 0.47 (0.39, 0.55) |
| September                                       | 1.5                 | 3.4           | 0.44 (0.43, 0.45) | 1.5           | 3.2           | 0.46 (0.45, 0.47) | 1.5           | 3.0           | 0.50 (0.48, 0.51) | 1.5           | 2.8           | 0.52 (0.51, 0.54) | 1.33               | 2.50          | 0.53 (0.52, 0.55) |
| October                                         | 1.2                 | 3.0           | 0.40 (0.39, 0.41) | 1.2           | 2.9           | 0.41 (0.40, 0.42) | 1.2           | 2.7           | 0.46 (0.44, 0.48) | 1.2           | 2.5           | 0.48 (0.46, 0.50) | 1.10               | 2.20          | 0.50 (0.49, 0.52) |
| November                                        | 1.2                 | 3.0           | 0.42 (0.40, 0.43) | 1.2           | 2.9           | 0.42 (0.41, 0.45) | 1.2           | 2.7           | 0.45 (0.44, 0.46) | 1.2           | 2.5           | 0.49 (0.47, 0.50) | 1.12               | 2.11          | 0.53 (0.51, 0.55) |
| <b>Sick visits</b>                              |                     |               |                   |               |               |                   |               |               |                   |               |               |                   |                    |               |                   |
| Overall                                         | 32.7                | 38.2          | 0.86 (0.81, 0.90) | 31.3          | 38.1          | 0.82 (0.78, 0.86) | 30.5          | 37.4          | 0.81 (0.78, 0.85) | 29.9          | 37.4          | 0.80 (0.77, 0.83) | 28.56              | 36.71         | 0.78 (0.75, 0.81) |
| March                                           | 33.1                | 40.9          | 0.81 (0.80, 0.82) | 32.4          | 41.0          | 0.79 (0.78, 0.80) | 32.2          | 40.2          | 0.80 (0.79, 0.81) | 32.3          | 40.3          | 0.80 (0.79, 0.81) | 31.65              | 39.82         | 0.79 (0.78, 0.81) |
| April                                           | 26.9                | 40.8          | 0.66 (0.64, 0.67) | 25.5          | 40.9          | 0.62 (0.61, 0.64) | 25.0          | 40.4          | 0.62 (0.60, 0.63) | 24.7          | 40.5          | 0.61 (0.60, 0.62) | 23.57              | 39.85         | 0.59 (0.58, 0.60) |

|   |           |      |      |                   |      |      |                   |      |      |                   |      |      |                   |       |       |                   |
|---|-----------|------|------|-------------------|------|------|-------------------|------|------|-------------------|------|------|-------------------|-------|-------|-------------------|
| 1 | May       | 29.6 | 39.7 | 0.75 (0.71, 0.78) | 28.0 | 39.7 | 0.70 (0.68, 0.73) | 26.9 | 39.3 | 0.68 (0.66, 0.71) | 26.8 | 39.3 | 0.68 (0.66, 0.71) | 25.39 | 38.77 | 0.65 (0.64, 0.67) |
| 2 | June      | 30.8 | 37.6 | 0.82 (0.78, 0.86) | 29.1 | 37.5 | 0.77 (0.74, 0.81) | 28.3 | 36.9 | 0.77 (0.74, 0.80) | 27.7 | 36.6 | 0.76 (0.73, 0.78) | 26.26 | 35.55 | 0.74 (0.72, 0.76) |
| 3 | July      | 33.3 | 35.1 | 0.95 (0.89, 1.01) | 31.9 | 34.7 | 0.92 (0.87, 0.97) | 30.8 | 34.0 | 0.91 (0.86, 0.95) | 30.1 | 33.8 | 0.89 (0.86, 0.93) | 28.21 | 32.82 | 0.86 (0.83, 0.89) |
| 4 | August    | 33.4 | 34.2 | 0.98 (0.88, 1.07) | 31.9 | 33.7 | 0.95 (0.87, 1.04) | 30.9 | 33.0 | 0.94 (0.87, 1.02) | 29.9 | 32.8 | 0.91 (0.85, 0.98) | 28.23 | 31.97 | 0.88 (0.83, 0.94) |
| 5 | September | 38.2 | 35.8 | 1.07 (1.01, 1.13) | 36.6 | 35.9 | 1.02 (0.97, 1.07) | 35.4 | 35.5 | 1.00 (0.95, 1.04) | 34.4 | 36.1 | 0.95 (0.91, 1.00) | 32.91 | 35.87 | 0.92 (0.88, 0.95) |
| 6 | October   | 35.1 | 37.6 | 0.93 (0.91, 0.97) | 34.1 | 37.5 | 0.91 (0.89, 0.93) | 33.1 | 37.0 | 0.90 (0.87, 0.92) | 32.1 | 37.3 | 0.86 (0.83, 0.89) | 30.83 | 36.83 | 0.84 (0.81, 0.86) |
| 7 | November  | 34.3 | 41.7 | 0.82 (0.80, 0.85) | 33.1 | 41.5 | 0.80 (0.77, 0.82) | 32.2 | 40.7 | 0.79 (0.77, 0.82) | 31.6 | 40.6 | 0.78 (0.75, 0.81) | 30.14 | 39.57 | 0.76 (0.73, 0.79) |

Confidential

6  
7  
8  
9  
10  
11  
12  
13  
14  
15  
16  
17  
18  
19  
20  
21  
22  
23  
24  
25  
26  
27  
28  
29  
30  
31  
32  
33  
34  
35  
36  
37  
38  
39  
40  
41  
42  
43  
44  
45  
46  
47

eTable 6. MANITOBA: Observed, expected and adjusted relative change (RR, 95% CI) in primary care (overall, virtual, in-person), well-child, and sick visits in Ontario, during the post-pandemic era, by material deprivation index. All rates are weekly visit rates per 1000 population and do not include newborns.

|                                                 | Observed rate       | Expected rate | RR (95% CI)       | Observed rate | Expected rate | RR (95% CI)       | Observed rate | Expected rate | RR (95% CI)       | Observed rate | Expected rate | RR (95% CI)       | Observed rate      | Expected rate | RR (95% CI)       |
|-------------------------------------------------|---------------------|---------------|-------------------|---------------|---------------|-------------------|---------------|---------------|-------------------|---------------|---------------|-------------------|--------------------|---------------|-------------------|
|                                                 | Q1 (least deprived) |               |                   | Q2            |               |                   | Q3            |               |                   | Q4            |               |                   | Q5 (most deprived) |               |                   |
| <b>All primary care visits</b>                  |                     |               |                   |               |               |                   |               |               |                   |               |               |                   |                    |               |                   |
| Overall                                         | 38.7                | 46.9          | 0.83 (0.79, 0.86) | 38.3          | 46.4          | 0.83 (0.80, 0.86) | 38.4          | 47.2          | 0.81 (0.79, 0.84) | 38.9          | 48.1          | 0.81 (0.78, 0.84) | 40.5               | 49.7          | 0.81 (0.79, 0.84) |
| March                                           | 38.2                | 49.7          | 0.77 (0.75, 0.78) | 39.1          | 48.8          | 0.80 (0.78, 0.82) | 41.1          | 49.2          | 0.83 (0.82, 0.85) | 42.0          | 50.2          | 0.84 (0.81, 0.86) | 44.5               | 52.7          | 0.85 (0.83, 0.86) |
| April                                           | 27.2                | 47.1          | 0.58 (0.56, 0.60) | 27.2          | 46.9          | 0.58 (0.56, 0.60) | 28.0          | 49.3          | 0.57 (0.56, 0.58) | 28.8          | 50.2          | 0.57 (0.55, 0.60) | 31.5               | 52.5          | 0.60 (0.58, 0.62) |
| May                                             | 31.8                | 46.0          | 0.69 (0.67, 0.71) | 32.8          | 45.9          | 0.71 (0.69, 0.74) | 32.2          | 47.1          | 0.68 (0.67, 0.70) | 33.3          | 49.0          | 0.68 (0.65, 0.71) | 34.8               | 50.3          | 0.69 (0.67, 0.71) |
| June                                            | 33.3                | 44.0          | 0.76 (0.73, 0.78) | 34.6          | 43.4          | 0.80 (0.78, 0.82) | 34.7          | 44.2          | 0.78 (0.78, 0.79) | 35.5          | 45.6          | 0.78 (0.75, 0.81) | 37.6               | 47.1          | 0.80 (0.78, 0.82) |
| July                                            | 37.5                | 39.8          | 0.94 (0.92, 0.97) | 37.9          | 40.0          | 0.95 (0.92, 0.98) | 38.1          | 41.4          | 0.92 (0.90, 0.94) | 39.6          | 42.4          | 0.93 (0.89, 0.98) | 42.5               | 44.6          | 0.95 (0.94, 0.97) |
| August                                          | 38.5                | 42.1          | 0.92 (0.86, 0.97) | 38.6          | 42.2          | 0.92 (0.87, 0.97) | 38.9          | 42.5          | 0.91 (0.88, 0.95) | 40.3          | 43.6          | 0.92 (0.88, 0.97) | 41.6               | 44.4          | 0.94 (0.91, 0.97) |
| September                                       | 38.2                | 45.0          | 0.85 (0.82, 0.88) | 39.1          | 44.6          | 0.88 (0.84, 0.91) | 39.9          | 46.2          | 0.86 (0.84, 0.89) | 39.5          | 47.3          | 0.84 (0.79, 0.89) | 43.9               | 51.9          | 0.85 (0.81, 0.88) |
| October                                         | 50.3                | 51.4          | 0.98 (0.94, 1.01) | 45.9          | 50.1          | 0.91 (0.90, 0.93) | 45.2          | 50.0          | 0.90 (0.87, 0.94) | 44.6          | 50.0          | 0.89 (0.87, 0.92) | 43.7               | 51.5          | 0.85 (0.83, 0.87) |
| November                                        | 55.4                | 55.9          | 0.99 (0.94, 1.05) | 51.0          | 54.3          | 0.94 (0.90, 0.98) | 48.1          | 54.2          | 0.89 (0.85, 0.93) | 46.9          | 53.8          | 0.87 (0.85, 0.89) | 44.0               | 53.9          | 0.82 (0.80, 0.84) |
| <b>Well-child visits</b>                        |                     |               |                   |               |               |                   |               |               |                   |               |               |                   |                    |               |                   |
| Overall                                         | 12.9                | 13.4          | 0.97 (0.89, 1.04) | 11.9          | 12.8          | 0.93 (0.86, 1.01) | 10.7          | 11.3          | 0.95 (0.88, 1.02) | 9.7           | 10.4          | 0.93 (0.87, 1.00) | 6.8                | 8.0           | 0.85 (0.80, 0.91) |
| March                                           | 7.4                 | 11.7          | 0.63 (0.60, 0.67) | 7.3           | 11.4          | 0.64 (0.61, 0.67) | 7.2           | 10.2          | 0.70 (0.68, 0.72) | 6.6           | 9.6           | 0.69 (0.66, 0.71) | 5.1                | 7.7           | 0.66 (0.64, 0.68) |
| April                                           | 6.2                 | 11.2          | 0.55 (0.54, 0.57) | 6.0           | 10.8          | 0.56 (0.54, 0.57) | 5.7           | 10.0          | 0.58 (0.55, 0.60) | 5.4           | 9.1           | 0.60 (0.58, 0.61) | 4.3                | 7.5           | 0.58 (0.56, 0.59) |
| May                                             | 8.1                 | 10.8          | 0.75 (0.72, 0.78) | 8.5           | 10.6          | 0.80 (0.78, 0.82) | 7.6           | 9.7           | 0.79 (0.76, 0.81) | 7.1           | 9.4           | 0.76 (0.73, 0.78) | 5.2                | 7.7           | 0.68 (0.64, 0.73) |
| June                                            | 9.5                 | 11.3          | 0.85 (0.82, 0.88) | 9.2           | 11.0          | 0.83 (0.81, 0.86) | 8.4           | 9.9           | 0.85 (0.82, 0.89) | 8.0           | 9.2           | 0.86 (0.83, 0.90) | 5.7                | 7.0           | 0.81 (0.77, 0.84) |
| July                                            | 10.2                | 11.3          | 0.90 (0.86, 0.96) | 10.2          | 11.1          | 0.92 (0.88, 0.97) | 9.2           | 9.9           | 0.94 (0.91, 0.96) | 8.6           | 9.5           | 0.90 (0.88, 0.93) | 6.6                | 7.2           | 0.92 (0.89, 0.96) |
| August                                          | 11.4                | 13.6          | 0.83 (0.76, 0.92) | 10.8          | 13.2          | 0.82 (0.74, 0.90) | 10.5          | 11.4          | 0.92 (0.86, 0.99) | 9.7           | 10.7          | 0.91 (0.84, 0.98) | 6.7                | 7.8           | 0.85 (0.82, 0.88) |
| September                                       | 10.6                | 12.6          | 0.84 (0.82, 0.86) | 10.0          | 12.1          | 0.83 (0.81, 0.85) | 9.2           | 10.7          | 0.86 (0.83, 0.89) | 8.9           | 9.9           | 0.89 (0.87, 0.92) | 6.8                | 8.0           | 0.86 (0.83, 0.89) |
| October                                         | 24.8                | 18.4          | 1.35 (1.19, 1.53) | 20.6          | 16.8          | 1.22 (1.07, 1.39) | 17.5          | 14.4          | 1.21 (1.06, 1.39) | 14.9          | 12.7          | 1.17 (1.04, 1.32) | 9.6                | 9.7           | 0.99 (0.89, 1.11) |
| November                                        | 31.2                | 20.4          | 1.53 (1.34, 1.75) | 26.8          | 18.6          | 1.44 (1.25, 1.66) | 22.3          | 16.1          | 1.39 (1.19, 1.62) | 19.6          | 14.2          | 1.37 (1.19, 1.59) | 12.3               | 10.6          | 1.16 (1.03, 1.31) |
| <b>Well-child visits (with immunization)</b>    |                     |               |                   |               |               |                   |               |               |                   |               |               |                   |                    |               |                   |
| Overall                                         | 8.4                 | 7.8           | 1.08 (0.92, 1.27) | 7.6           | 7.7           | 0.99 (0.85, 1.16) | 6.7           | 6.7           | 1.00 (0.85, 1.18) | 6.0           | 6.3           | 0.95 (0.81, 1.12) | 3.7                | 4.3           | 0.87 (0.74, 1.04) |
| March                                           | 3.6                 | 5.4           | 0.67 (0.56, 0.80) | 3.8           | 5.5           | 0.68 (0.58, 0.81) | 3.6           | 5.1           | 0.72 (0.62, 0.83) | 3.6           | 4.9           | 0.73 (0.62, 0.85) | 2.2                | 3.5           | 0.64 (0.55, 0.74) |
| April                                           | 3.0                 | 5.1           | 0.59 (0.52, 0.66) | 3.0           | 5.2           | 0.59 (0.53, 0.66) | 3.0           | 4.8           | 0.63 (0.55, 0.73) | 2.9           | 4.6           | 0.63 (0.57, 0.71) | 2.0                | 3.3           | 0.60 (0.53, 0.68) |
| May                                             | 3.7                 | 4.8           | 0.78 (0.68, 0.89) | 4.1           | 5.0           | 0.81 (0.71, 0.93) | 3.9           | 4.7           | 0.84 (0.72, 0.97) | 3.7           | 4.6           | 0.80 (0.69, 0.94) | 2.4                | 3.1           | 0.77 (0.64, 0.94) |
| June                                            | 4.2                 | 5.2           | 0.82 (0.72, 0.94) | 4.2           | 5.7           | 0.74 (0.64, 0.85) | 4.1           | 5.0           | 0.81 (0.68, 0.97) | 3.8           | 4.8           | 0.79 (0.65, 0.95) | 2.4                | 3.3           | 0.74 (0.61, 0.91) |
| July                                            | 4.6                 | 4.9           | 0.94 (0.76, 1.15) | 4.8           | 5.5           | 0.88 (0.74, 1.04) | 4.4           | 4.9           | 0.91 (0.74, 1.13) | 4.0           | 5.0           | 0.80 (0.67, 0.96) | 3.0                | 3.3           | 0.90 (0.75, 1.09) |
| August                                          | 4.9                 | 5.9           | 0.84 (0.76, 0.92) | 5.0           | 6.3           | 0.80 (0.72, 0.88) | 5.1           | 5.7           | 0.90 (0.79, 1.02) | 4.7           | 5.4           | 0.87 (0.79, 0.96) | 2.8                | 3.5           | 0.78 (0.70, 0.88) |
| September                                       | 5.6                 | 6.0           | 0.94 (0.83, 1.05) | 5.4           | 6.1           | 0.90 (0.79, 1.01) | 5.1           | 5.5           | 0.91 (0.78, 1.07) | 4.5           | 5.4           | 0.84 (0.72, 0.97) | 3.3                | 3.7           | 0.89 (0.77, 1.03) |
| October                                         | 21.6                | 14.7          | 1.47 (1.15, 1.88) | 17.4          | 13.5          | 1.30 (1.04, 1.61) | 14.1          | 11.2          | 1.26 (1.03, 1.53) | 11.7          | 10.0          | 1.16 (0.97, 1.40) | 6.8                | 6.7           | 1.01 (0.83, 1.24) |
| November                                        | 27.8                | 17.3          | 1.61 (1.33, 1.94) | 23.4          | 15.8          | 1.48 (1.22, 1.80) | 19.2          | 13.2          | 1.46 (1.20, 1.77) | 16.6          | 11.6          | 1.44 (1.17, 1.77) | 9.6                | 7.8           | 1.24 (1.03, 1.49) |
| <b>Well-child visits (without immunization)</b> |                     |               |                   |               |               |                   |               |               |                   |               |               |                   |                    |               |                   |
| Overall                                         | 4.5                 | 5.6           | 0.80 (0.72, 0.89) | 4.3           | 5.2           | 0.82 (0.71, 0.95) | 3.9           | 4.7           | 0.84 (0.73, 0.97) | 3.7           | 4.3           | 0.87 (0.76, 0.99) | 3.1                | 3.8           | 0.81 (0.74, 0.90) |
| March                                           | 3.8                 | 6.0           | 0.63 (0.60, 0.66) | 3.6           | 5.6           | 0.63 (0.55, 0.73) | 3.6           | 5.0           | 0.72 (0.65, 0.79) | 3.1           | 4.6           | 0.66 (0.60, 0.73) | 2.9                | 4.1           | 0.70 (0.65, 0.76) |
| April                                           | 3.2                 | 5.8           | 0.56 (0.52, 0.61) | 3.0           | 5.3           | 0.56 (0.51, 0.61) | 2.7           | 5.0           | 0.55 (0.50, 0.60) | 2.5           | 4.3           | 0.58 (0.53, 0.63) | 2.3                | 4.0           | 0.58 (0.55, 0.62) |
| May                                             | 4.3                 | 5.6           | 0.77 (0.72, 0.83) | 4.4           | 5.3           | 0.84 (0.76, 0.93) | 3.7           | 4.7           | 0.78 (0.71, 0.85) | 3.4           | 4.6           | 0.75 (0.67, 0.83) | 2.8                | 4.3           | 0.65 (0.57, 0.75) |
| June                                            | 5.3                 | 5.8           | 0.91 (0.83, 1.00) | 5.0           | 5.2           | 0.95 (0.84, 1.07) | 4.4           | 4.8           | 0.92 (0.81, 1.04) | 4.2           | 4.4           | 0.96 (0.86, 1.07) | 3.2                | 3.7           | 0.87 (0.79, 0.95) |
| July                                            | 5.6                 | 5.8           | 0.95 (0.84, 1.09) | 5.4           | 5.4           | 1.01 (0.84, 1.22) | 4.8           | 4.8           | 0.99 (0.84, 1.17) | 4.6           | 4.5           | 1.04 (0.89, 1.22) | 3.7                | 3.8           | 0.96 (0.86, 1.07) |
| August                                          | 6.4                 | 7.2           | 0.89 (0.73, 1.08) | 5.7           | 6.6           | 0.87 (0.69, 1.10) | 5.4           | 5.6           | 0.97 (0.76, 1.23) | 5.0           | 5.2           | 0.98 (0.78, 1.22) | 3.9                | 4.2           | 0.92 (0.80, 1.05) |
| September                                       | 5.0                 | 6.3           | 0.79 (0.71, 0.89) | 4.6           | 5.7           | 0.80 (0.69, 0.93) | 4.1           | 5.0           | 0.82 (0.70, 0.96) | 4.4           | 4.5           | 0.97 (0.85, 1.10) | 3.5                | 4.1           | 0.85 (0.76, 0.95) |
| October                                         | 3.2                 | 5.0           | 0.65 (0.60, 0.70) | 3.1           | 4.6           | 0.68 (0.60, 0.77) | 3.4           | 4.2           | 0.81 (0.71, 0.91) | 3.2           | 3.7           | 0.87 (0.79, 0.95) | 2.8                | 3.5           | 0.79 (0.73, 0.86) |
| November                                        | 3.4                 | 4.6           | 0.74 (0.67, 0.82) | 3.3           | 4.3           | 0.77 (0.67, 0.88) | 3.1           | 4.0           | 0.78 (0.69, 0.88) | 2.9           | 3.7           | 0.78 (0.70, 0.87) | 2.7                | 3.4           | 0.78 (0.73, 0.84) |
| <b>Sick visits</b>                              |                     |               |                   |               |               |                   |               |               |                   |               |               |                   |                    |               |                   |
| Overall                                         | 25.8                | 33.5          | 0.77 (0.74, 0.81) | 26.4          | 33.7          | 0.79 (0.75, 0.82) | 27.7          | 36.0          | 0.77 (0.74, 0.80) | 29.2          | 37.7          | 0.78 (0.74, 0.82) | 33.6               | 41.7          | 0.81 (0.78, 0.84) |
| March                                           | 30.8                | 37.9          | 0.81 (0.80, 0.83) | 31.8          | 37.3          | 0.85 (0.84, 0.87) | 33.9          | 38.9          | 0.87 (0.85, 0.89) | 35.4          | 40.6          | 0.87 (0.85, 0.90) | 39.4               | 45.0          | 0.88 (0.86, 0.90) |
| April                                           | 21.0                | 35.9          | 0.59 (0.57, 0.61) | 21.2          | 36.0          | 0.59 (0.56, 0.62) | 22.3          | 39.2          | 0.57 (0.55, 0.58) | 23.3          | 41.1          | 0.57 (0.54, 0.60) | 27.2               | 45.1          | 0.60 (0.58, 0.63) |

|   |           |      |      |                   |      |      |                   |      |      |                   |      |      |                   |      |      |                   |
|---|-----------|------|------|-------------------|------|------|-------------------|------|------|-------------------|------|------|-------------------|------|------|-------------------|
| 1 | May       | 23.7 | 35.1 | 0.67 (0.65, 0.70) | 24.2 | 35.1 | 0.69 (0.66, 0.72) | 24.7 | 37.4 | 0.66 (0.64, 0.68) | 26.2 | 39.6 | 0.66 (0.63, 0.69) | 29.5 | 42.7 | 0.69 (0.66, 0.72) |
| 2 | June      | 23.8 | 32.7 | 0.73 (0.69, 0.76) | 25.5 | 32.4 | 0.79 (0.76, 0.82) | 26.2 | 34.3 | 0.76 (0.75, 0.78) | 27.5 | 36.3 | 0.76 (0.73, 0.79) | 32.0 | 40.1 | 0.80 (0.77, 0.82) |
| 3 | July      | 27.3 | 28.6 | 0.96 (0.93, 0.99) | 27.7 | 29.0 | 0.95 (0.92, 0.99) | 28.8 | 31.6 | 0.91 (0.89, 0.94) | 31.0 | 32.9 | 0.94 (0.89, 0.99) | 35.9 | 37.4 | 0.96 (0.94, 0.98) |
| 4 | August    | 27.1 | 28.5 | 0.95 (0.88, 1.02) | 27.9 | 29.1 | 0.96 (0.89, 1.03) | 28.4 | 31.2 | 0.91 (0.86, 0.97) | 30.6 | 32.9 | 0.93 (0.87, 1.00) | 34.9 | 36.6 | 0.95 (0.91, 1.00) |
| 5 | September | 27.6 | 32.5 | 0.85 (0.80, 0.90) | 29.0 | 32.6 | 0.89 (0.84, 0.95) | 30.7 | 35.4 | 0.87 (0.82, 0.91) | 30.7 | 37.3 | 0.82 (0.76, 0.89) | 37.1 | 43.9 | 0.84 (0.80, 0.89) |
| 6 | October   | 25.5 | 33.1 | 0.77 (0.75, 0.80) | 25.3 | 33.5 | 0.76 (0.73, 0.78) | 27.8 | 35.7 | 0.78 (0.75, 0.81) | 29.7 | 37.3 | 0.80 (0.76, 0.83) | 34.2 | 41.9 | 0.81 (0.78, 0.85) |
| 7 | November  | 24.2 | 35.5 | 0.68 (0.66, 0.70) | 24.2 | 35.8 | 0.68 (0.66, 0.69) | 25.8 | 38.2 | 0.67 (0.65, 0.70) | 27.4 | 39.6 | 0.69 (0.68, 0.71) | 31.7 | 43.3 | 0.73 (0.71, 0.76) |

Confidential

6  
7  
8  
9  
10  
11  
12  
13  
14  
15  
16  
17  
18  
19  
20  
21  
22  
23  
24  
25  
26  
27  
28  
29  
30  
31  
32  
33  
34  
35  
36  
37  
38  
39  
40  
41  
42  
43  
44  
45  
46  
47

**eTable 7. ONTARIO: Observed, expected, adjusted relative change (RR, 95% CI) in primary care, well-child, and sick visits in Ontario, during post-pandemic months, by rurality.** All rates are weekly visit rates per 1000 population and do not include newborns.

|                                                  | Observed rate | Expected rate | RR (95% CI)       | Observed rate | Expected rate | RR (95% CI)       |
|--------------------------------------------------|---------------|---------------|-------------------|---------------|---------------|-------------------|
|                                                  | Urban         |               |                   | Rural         |               |                   |
| <b>All primary care visits</b>                   |               |               |                   |               |               |                   |
| Overall                                          | 41.1          | 51.8          | 0.79 (0.77, 0.82) | 24.0          | 28.0          | 0.86 (0.84, 0.88) |
| March                                            | 40.0          | 54.3          | 0.74 (0.73, 0.74) | 23.3          | 29.8          | 0.78 (0.77, 0.79) |
| April                                            | 30.5          | 53.1          | 0.58 (0.57, 0.58) | 20.1          | 29.0          | 0.69 (0.68, 0.70) |
| May                                              | 34.0          | 51.2          | 0.66 (0.65, 0.68) | 21.1          | 28.1          | 0.75 (0.74, 0.77) |
| June                                             | 35.7          | 48.6          | 0.74 (0.72, 0.75) | 20.7          | 26.6          | 0.78 (0.76, 0.80) |
| July                                             | 39.4          | 46.1          | 0.85 (0.83, 0.88) | 22.0          | 24.6          | 0.89 (0.88, 0.91) |
| August                                           | 40.6          | 46.6          | 0.87 (0.82, 0.92) | 22.7          | 25.2          | 0.90 (0.88, 0.92) |
| September                                        | 44.9          | 48.9          | 0.92 (0.90, 0.94) | 25.8          | 26.8          | 0.96 (0.94, 0.99) |
| October                                          | 52.3          | 53.8          | 0.97 (0.95, 0.99) | 28.2          | 29.5          | 0.95 (0.94, 0.97) |
| November                                         | 54.9          | 63.3          | 0.87 (0.83, 0.90) | 33.2          | 34.1          | 0.98 (0.94, 1.02) |
| <b>Well-child visits</b>                         |               |               |                   |               |               |                   |
| Overall                                          | 9.2           | 12.6          | 0.73 (0.66, 0.80) | 6.1           | 8.1           | 0.75 (0.69, 0.82) |
| March                                            | 6.4           | 12.2          | 0.52 (0.49, 0.56) | 4.5           | 8.3           | 0.55 (0.54, 0.56) |
| April                                            | 4.5           | 11.3          | 0.40 (0.37, 0.43) | 3.6           | 7.4           | 0.49 (0.47, 0.51) |
| May                                              | 5.6           | 10.8          | 0.52 (0.46, 0.58) | 4.2           | 7.2           | 0.58 (0.54, 0.64) |
| June                                             | 6.0           | 10.8          | 0.55 (0.51, 0.61) | 4.3           | 7.0           | 0.63 (0.56, 0.70) |
| July                                             | 7.1           | 12.1          | 0.58 (0.56, 0.61) | 5.0           | 7.4           | 0.67 (0.63, 0.70) |
| August                                           | 8.2           | 13.4          | 0.61 (0.57, 0.66) | 5.8           | 8.5           | 0.69 (0.64, 0.74) |
| September                                        | 7.8           | 10.9          | 0.71 (0.63, 0.80) | 5.6           | 7.5           | 0.75 (0.69, 0.81) |
| October                                          | 17.8          | 13.9          | 1.28 (1.21, 1.36) | 9.0           | 9.1           | 0.99 (0.94, 1.05) |
| November                                         | 21.2          | 17.9          | 1.19 (1.04, 1.36) | 13.7          | 11.2          | 1.23 (1.06, 1.43) |
| <b>Well-child visits (with immunizations)</b>    |               |               |                   |               |               |                   |
| Overall                                          | 8.1           | 9.7           | 0.83 (0.73, 0.95) | 5.0           | 6.0           | 0.84 (0.76, 0.94) |
| March                                            | 5.1           | 9.0           | 0.56 (0.54, 0.59) | 3.4           | 6.1           | 0.56 (0.54, 0.58) |
| April                                            | 4.1           | 7.8           | 0.53 (0.48, 0.58) | 3.0           | 5.1           | 0.60 (0.57, 0.64) |
| May                                              | 4.9           | 7.3           | 0.68 (0.58, 0.79) | 3.5           | 4.8           | 0.72 (0.64, 0.81) |
| June                                             | 5.1           | 7.1           | 0.72 (0.61, 0.84) | 3.4           | 4.5           | 0.74 (0.64, 0.86) |
| July                                             | 5.8           | 7.4           | 0.79 (0.69, 0.92) | 3.8           | 4.7           | 0.80 (0.71, 0.90) |
| August                                           | 6.6           | 8.4           | 0.78 (0.73, 0.84) | 4.5           | 5.7           | 0.79 (0.74, 0.84) |
| September                                        | 6.3           | 7.7           | 0.82 (0.70, 0.95) | 4.2           | 5.1           | 0.83 (0.74, 0.92) |
| October                                          | 16.6          | 12.3          | 1.35 (1.20, 1.51) | 7.9           | 7.2           | 1.10 (1.02, 1.19) |
| November                                         | 20.1          | 19.1          | 1.05 (0.85, 1.30) | 12.6          | 10.5          | 1.20 (1.00, 1.44) |
| <b>Well-child visits (without immunizations)</b> |               |               |                   |               |               |                   |
| Overall                                          | 1.1           | 2.9           | 0.38 (0.35, 0.41) | 1.1           | 2.1           | 0.50 (0.48, 0.53) |
| March                                            | 1.3           | 3.1           | 0.43 (0.41, 0.44) | 1.1           | 2.2           | 0.52 (0.50, 0.53) |
| April                                            | 0.4           | 2.8           | 0.14 (0.14, 0.15) | 0.6           | 2.2           | 0.26 (0.25, 0.27) |
| May                                              | 0.6           | 2.7           | 0.23 (0.21, 0.25) | 0.7           | 2.1           | 0.35 (0.34, 0.36) |
| June                                             | 0.9           | 2.8           | 0.31 (0.30, 0.33) | 1.0           | 2.1           | 0.46 (0.44, 0.48) |
| July                                             | 1.2           | 3.3           | 0.37 (0.34, 0.39) | 1.2           | 2.2           | 0.53 (0.51, 0.55) |
| August                                           | 1.6           | 3.9           | 0.40 (0.35, 0.47) | 1.3           | 2.4           | 0.55 (0.49, 0.62) |
| September                                        | 1.5           | 3.1           | 0.47 (0.46, 0.49) | 1.4           | 2.3           | 0.59 (0.57, 0.62) |
| October                                          | 1.2           | 2.7           | 0.43 (0.42, 0.44) | 1.2           | 2.2           | 0.54 (0.54, 0.55) |
| November                                         | 1.2           | 2.7           | 0.44 (0.43, 0.46) | 1.2           | 2.1           | 0.55 (0.54, 0.57) |
| <b>Sick visits</b>                               |               |               |                   |               |               |                   |
| Overall                                          | 31.9          | 39.3          | 0.81 (0.78, 0.85) | 17.9          | 19.9          | 0.90 (0.86, 0.94) |
| March                                            | 33.6          | 42.3          | 0.80 (0.79, 0.80) | 18.8          | 21.6          | 0.87 (0.86, 0.88) |
| April                                            | 26.0          | 42.4          | 0.61 (0.60, 0.63) | 16.5          | 21.6          | 0.76 (0.75, 0.77) |
| May                                              | 28.4          | 41.1          | 0.69 (0.67, 0.72) | 16.9          | 21.1          | 0.80 (0.78, 0.83) |
| June                                             | 29.7          | 38.5          | 0.77 (0.74, 0.80) | 16.4          | 19.8          | 0.83 (0.80, 0.85) |
| July                                             | 32.3          | 35.7          | 0.91 (0.86, 0.95) | 17.0          | 17.7          | 0.96 (0.92, 1.00) |
| August                                           | 32.4          | 34.7          | 0.93 (0.86, 1.01) | 16.8          | 17.3          | 0.97 (0.90, 1.05) |
| September                                        | 37.1          | 37.4          | 0.99 (0.95, 1.04) | 20.2          | 19.2          | 1.05 (1.00, 1.11) |
| October                                          | 34.5          | 38.9          | 0.89 (0.86, 0.91) | 19.2          | 20.3          | 0.94 (0.91, 0.98) |
| November                                         | 33.6          | 42.7          | 0.79 (0.76, 0.82) | 19.5          | 22.1          | 0.88 (0.87, 0.90) |

**eTable 8. MANITOBA: Observed, expected, adjusted relative change (RR, 95% CI) in primary care, well-child, and sick visits in Ontario, during post-pandemic months, by rurality.** All rates are weekly visit rates per 1000 population and do not include newborns.

|                                                  | Observed rate | Expected rate | RR (95% CI)       | Observed rate | Expected rate | RR (95% CI)       |
|--------------------------------------------------|---------------|---------------|-------------------|---------------|---------------|-------------------|
|                                                  | Urban         |               |                   | Rural         |               |                   |
| <b>All primary care visits</b>                   |               |               |                   |               |               |                   |
| Overall                                          | 44.9          | 54.0          | 0.83 (0.80, 0.86) | 26.0          | 33.5          | 0.78 (0.75, 0.80) |
| March                                            | 46.7          | 56.9          | 0.82 (0.80, 0.84) | 28.6          | 35.2          | 0.81 (0.80, 0.82) |
| April                                            | 32.7          | 55.5          | 0.59 (0.57, 0.61) | 19.7          | 35.4          | 0.56 (0.54, 0.57) |
| May                                              | 37.6          | 53.7          | 0.70 (0.68, 0.72) | 22.8          | 34.3          | 0.67 (0.65, 0.69) |
| June                                             | 40.0          | 50.5          | 0.79 (0.77, 0.81) | 24.6          | 32.4          | 0.76 (0.75, 0.77) |
| July                                             | 44.6          | 47.0          | 0.95 (0.92, 0.98) | 27.2          | 29.9          | 0.91 (0.89, 0.92) |
| August                                           | 45.6          | 49.0          | 0.93 (0.89, 0.98) | 26.6          | 29.7          | 0.89 (0.85, 0.94) |
| September                                        | 45.8          | 52.8          | 0.87 (0.83, 0.90) | 27.9          | 33.8          | 0.82 (0.79, 0.86) |
| October                                          | 54.4          | 57.8          | 0.94 (0.92, 0.96) | 27.8          | 34.6          | 0.80 (0.77, 0.84) |
| November                                         | 58.2          | 62.4          | 0.93 (0.90, 0.97) | 29.2          | 36.4          | 0.80 (0.78, 0.83) |
| <b>Well-child visits</b>                         |               |               |                   |               |               |                   |
| Overall                                          | 13.4          | 14.0          | 0.96 (0.89, 1.03) | 3.9           | 4.8           | 0.82 (0.77, 0.87) |
| March                                            | 8.4           | 12.7          | 0.67 (0.64, 0.69) | 3.0           | 4.6           | 0.65 (0.64, 0.66) |
| April                                            | 7.0           | 12.1          | 0.58 (0.56, 0.59) | 2.4           | 4.5           | 0.53 (0.52, 0.54) |
| May                                              | 9.3           | 11.9          | 0.78 (0.76, 0.80) | 3.0           | 4.6           | 0.65 (0.62, 0.67) |
| June                                             | 10.4          | 12.1          | 0.85 (0.83, 0.88) | 3.4           | 4.3           | 0.78 (0.75, 0.82) |
| July                                             | 11.3          | 12.2          | 0.93 (0.89, 0.97) | 3.8           | 4.5           | 0.85 (0.82, 0.87) |
| August                                           | 12.5          | 14.3          | 0.87 (0.81, 0.94) | 4.0           | 4.9           | 0.82 (0.75, 0.89) |
| September                                        | 11.6          | 13.2          | 0.88 (0.86, 0.90) | 3.6           | 4.8           | 0.75 (0.73, 0.77) |
| October                                          | 23.2          | 18.2          | 1.27 (1.12, 1.45) | 5.1           | 5.7           | 0.90 (0.81, 0.98) |
| November                                         | 29.2          | 20.3          | 1.44 (1.25, 1.66) | 7.6           | 6.0           | 1.27 (1.12, 1.43) |
| <b>Well-child visits (with immunizations)</b>    |               |               |                   |               |               |                   |
| Overall                                          | 8.5           | 8.5           | 1.01 (0.86, 1.18) | 2.1           | 2.2           | 0.93 (0.80, 1.08) |
| March                                            | 4.3           | 6.2           | 0.69 (0.59, 0.82) | 1.3           | 1.8           | 0.69 (0.61, 0.79) |
| April                                            | 3.6           | 5.9           | 0.61 (0.54, 0.69) | 1.1           | 1.8           | 0.61 (0.56, 0.67) |
| May                                              | 4.6           | 5.7           | 0.81 (0.70, 0.94) | 1.3           | 1.7           | 0.78 (0.68, 0.90) |
| June                                             | 4.8           | 6.2           | 0.78 (0.66, 0.92) | 1.4           | 1.8           | 0.78 (0.66, 0.92) |
| July                                             | 5.4           | 6.0           | 0.90 (0.73, 1.09) | 1.5           | 1.8           | 0.84 (0.73, 0.96) |
| August                                           | 5.8           | 6.9           | 0.84 (0.75, 0.93) | 1.7           | 2.0           | 0.84 (0.79, 0.90) |
| September                                        | 6.2           | 6.8           | 0.92 (0.80, 1.05) | 1.6           | 2.0           | 0.79 (0.70, 0.88) |
| October                                          | 19.4          | 14.6          | 1.33 (1.08, 1.63) | 3.3           | 3.4           | 0.99 (0.81, 1.21) |
| November                                         | 25.5          | 17.0          | 1.49 (1.25, 1.79) | 6.0           | 3.8           | 1.58 (1.25, 2.01) |
| <b>Well-child visits (without immunizations)</b> |               |               |                   |               |               |                   |
| Overall                                          | 4.8           | 5.7           | 0.86 (0.75, 0.98) | 1.9           | 2.6           | 0.71 (0.65, 0.77) |
| March                                            | 4.1           | 6.1           | 0.67 (0.61, 0.75) | 1.7           | 2.7           | 0.63 (0.60, 0.66) |
| April                                            | 3.4           | 5.9           | 0.58 (0.53, 0.64) | 1.3           | 2.7           | 0.48 (0.46, 0.51) |
| May                                              | 4.7           | 5.8           | 0.80 (0.73, 0.89) | 1.6           | 2.8           | 0.59 (0.53, 0.65) |
| June                                             | 5.5           | 5.8           | 0.95 (0.84, 1.08) | 2.0           | 2.5           | 0.79 (0.75, 0.83) |
| July                                             | 6.0           | 5.9           | 1.02 (0.86, 1.20) | 2.3           | 2.7           | 0.85 (0.78, 0.94) |
| August                                           | 6.7           | 7.0           | 0.95 (0.76, 1.18) | 2.3           | 2.9           | 0.80 (0.67, 0.96) |
| September                                        | 5.4           | 6.1           | 0.87 (0.76, 1.01) | 2.0           | 2.8           | 0.73 (0.69, 0.78) |
| October                                          | 3.8           | 5.0           | 0.77 (0.69, 0.86) | 1.7           | 2.6           | 0.67 (0.63, 0.72) |
| November                                         | 3.8           | 4.7           | 0.80 (0.71, 0.90) | 1.7           | 2.5           | 0.66 (0.62, 0.70) |
| <b>Sick visits</b>                               |               |               |                   |               |               |                   |
| Overall                                          | 31.5          | 40.0          | 0.79 (0.76, 0.82) | 22.1          | 28.7          | 0.77 (0.74, 0.80) |
| March                                            | 38.2          | 44.2          | 0.86 (0.85, 0.88) | 25.6          | 30.6          | 0.84 (0.83, 0.84) |
| April                                            | 25.7          | 43.3          | 0.59 (0.57, 0.61) | 17.3          | 30.9          | 0.56 (0.54, 0.58) |
| May                                              | 28.3          | 41.7          | 0.68 (0.65, 0.71) | 19.9          | 29.7          | 0.67 (0.64, 0.70) |
| June                                             | 29.6          | 38.4          | 0.77 (0.74, 0.80) | 21.3          | 28.1          | 0.76 (0.74, 0.77) |
| July                                             | 33.3          | 34.8          | 0.96 (0.92, 0.99) | 23.3          | 25.4          | 0.92 (0.90, 0.93) |
| August                                           | 33.1          | 34.8          | 0.95 (0.89, 1.02) | 22.6          | 24.9          | 0.91 (0.86, 0.96) |
| September                                        | 34.2          | 39.6          | 0.86 (0.81, 0.92) | 24.2          | 29.0          | 0.84 (0.79, 0.89) |
| October                                          | 31.2          | 39.6          | 0.79 (0.76, 0.81) | 22.7          | 28.9          | 0.79 (0.75, 0.83) |
| November                                         | 28.9          | 42.0          | 0.69 (0.67, 0.70) | 21.6          | 30.4          | 0.71 (0.68, 0.74) |



**eTable 9. ONTARIO: Observed, expected, and adjusted relative change (RR, 95% CI) in primary care, well-child, and sick visits in Ontario, during post-pandemic months, by immigrant status.** All rates are weekly visit rates per 1000 population and do not include children <3 years.

|                                                  | Observed rate | Expected rate | RR (95% CI)       | Observed rate | Expected rate | RR (95% CI)       | Observed rate                        | Expected rate | RR (95% CI)       |
|--------------------------------------------------|---------------|---------------|-------------------|---------------|---------------|-------------------|--------------------------------------|---------------|-------------------|
|                                                  | Immigrants    |               |                   | Refugees      |               |                   | Canadian-born or long-term residents |               |                   |
| <b>All primary care visits</b>                   |               |               |                   |               |               |                   |                                      |               |                   |
| Overall                                          | 28.9          | 36.0          | 0.80 (0.76, 0.84) | 32.5          | 42.0          | 0.77 (0.72, 0.83) | 31.1                                 | 39.1          | 0.80 (0.77, 0.82) |
| March                                            | 28.7          | 39.8          | 0.72 (0.70, 0.74) | 36.7          | 47.3          | 0.78 (0.72, 0.83) | 30.3                                 | 40.8          | 0.74 (0.74, 0.75) |
| April                                            | 18.5          | 38.2          | 0.48 (0.47, 0.50) | 20.5          | 45.4          | 0.45 (0.42, 0.48) | 21.8                                 | 40.3          | 0.54 (0.53, 0.55) |
| May                                              | 21.8          | 36.7          | 0.59 (0.57, 0.62) | 23.2          | 42.1          | 0.55 (0.50, 0.60) | 24.2                                 | 38.9          | 0.62 (0.60, 0.64) |
| June                                             | 26.1          | 34.4          | 0.76 (0.72, 0.80) | 27.9          | 37.6          | 0.74 (0.68, 0.81) | 25.9                                 | 36.8          | 0.70 (0.68, 0.73) |
| July                                             | 29.0          | 32.9          | 0.88 (0.82, 0.95) | 31.1          | 37.0          | 0.84 (0.77, 0.91) | 29.1                                 | 35.1          | 0.83 (0.80, 0.86) |
| August                                           | 30.9          | 34.6          | 0.89 (0.82, 0.97) | 33.1          | 38.3          | 0.86 (0.79, 0.95) | 31.1                                 | 36.6          | 0.85 (0.81, 0.89) |
| September                                        | 30.5          | 33.1          | 0.92 (0.87, 0.97) | 36.6          | 38.6          | 0.95 (0.88, 1.02) | 34.8                                 | 36.3          | 0.96 (0.93, 1.00) |
| October                                          | 37.6          | 35.4          | 1.06 (1.02, 1.10) | 42.6          | 42.3          | 1.01 (0.95, 1.06) | 41.2                                 | 40.2          | 1.02 (1.00, 1.05) |
| November                                         | 38.0          | 41.1          | 0.93 (0.90, 0.95) | 41.5          | 50.1          | 0.83 (0.81, 0.85) | 43.4                                 | 47.4          | 0.92 (0.88, 0.96) |
| <b>Well-child visits</b>                         |               |               |                   |               |               |                   |                                      |               |                   |
| Overall                                          | 3.0           | 5.6           | 0.54 (0.51, 0.58) | 3.3           | 5.9           | 0.56 (0.52, 0.61) | 3.9                                  | 6.0           | 0.64 (0.60, 0.69) |
| March                                            | 2.1           | 5.6           | 0.37 (0.36, 0.39) | 3.0           | 6.7           | 0.44 (0.39, 0.50) | 2.1                                  | 5.3           | 0.40 (0.40, 0.41) |
| April                                            | 0.2           | 4.3           | 0.05 (0.05, 0.05) | 0.2           | 5.3           | 0.03 (0.03, 0.03) | 0.3                                  | 4.6           | 0.07 (0.07, 0.07) |
| May                                              | 0.4           | 3.3           | 0.11 (0.10, 0.11) | 0.4           | 4.1           | 0.09 (0.09, 0.10) | 0.6                                  | 4.0           | 0.15 (0.14, 0.17) |
| June                                             | 0.8           | 3.5           | 0.24 (0.23, 0.25) | 0.7           | 3.3           | 0.20 (0.19, 0.21) | 1.1                                  | 4.2           | 0.26 (0.24, 0.28) |
| July                                             | 1.3           | 4.4           | 0.29 (0.28, 0.31) | 1.1           | 4.0           | 0.28 (0.26, 0.29) | 1.7                                  | 5.3           | 0.32 (0.30, 0.34) |
| August                                           | 1.8           | 5.7           | 0.32 (0.30, 0.33) | 2.2           | 5.3           | 0.41 (0.40, 0.42) | 3.1                                  | 7.1           | 0.44 (0.41, 0.47) |
| September                                        | 1.5           | 3.8           | 0.40 (0.36, 0.44) | 1.6           | 3.8           | 0.41 (0.37, 0.46) | 2.3                                  | 4.4           | 0.53 (0.47, 0.60) |
| October                                          | 9.7           | 7.1           | 1.38 (1.30, 1.46) | 10.5          | 7.0           | 1.49 (1.40, 1.59) | 10.9                                 | 7.4           | 1.48 (1.35, 1.61) |
| November                                         | 10.6          | 10.8          | 0.98 (0.95, 1.02) | 11.5          | 11.3          | 1.01 (0.97, 1.06) | 14.1                                 | 11.2          | 1.26 (1.16, 1.37) |
| <b>Well-child visits (with immunizations)</b>    |               |               |                   |               |               |                   |                                      |               |                   |
| Overall                                          | 2.5           | 3.8           | 0.66 (0.60, 0.73) | 2.8           | 4.7           | 0.59 (0.52, 0.67) | 3.4                                  | 4.3           | 0.80 (0.69, 0.92) |
| March                                            | 1.4           | 3.7           | 0.38 (0.36, 0.40) | 2.4           | 5.3           | 0.46 (0.41, 0.51) | 1.4                                  | 3.6           | 0.40 (0.39, 0.41) |
| April                                            | 0.2           | 2.6           | 0.06 (0.06, 0.06) | 0.1           | 3.9           | 0.03 (0.02, 0.03) | 0.3                                  | 2.7           | 0.10 (0.09, 0.10) |
| May                                              | 0.2           | 1.8           | 0.13 (0.12, 0.14) | 0.3           | 2.8           | 0.09 (0.09, 0.10) | 0.5                                  | 2.3           | 0.22 (0.19, 0.25) |
| June                                             | 0.5           | 1.8           | 0.28 (0.26, 0.31) | 0.4           | 1.9           | 0.20 (0.18, 0.22) | 0.8                                  | 2.3           | 0.36 (0.31, 0.42) |
| July                                             | 0.6           | 1.9           | 0.34 (0.30, 0.38) | 0.5           | 2.2           | 0.21 (0.19, 0.23) | 1.2                                  | 2.5           | 0.49 (0.41, 0.58) |
| August                                           | 0.9           | 2.8           | 0.32 (0.28, 0.37) | 1.0           | 3.3           | 0.30 (0.26, 0.35) | 2.3                                  | 3.7           | 0.60 (0.50, 0.73) |
| September                                        | 0.7           | 2.1           | 0.35 (0.29, 0.41) | 0.8           | 2.5           | 0.33 (0.27, 0.40) | 1.7                                  | 2.5           | 0.67 (0.57, 0.79) |
| October                                          | 9.2           | 5.7           | 1.62 (1.51, 1.74) | 9.8           | 6.0           | 1.65 (1.53, 1.79) | 10.5                                 | 6.3           | 1.66 (1.44, 1.92) |
| November                                         | 10.0          | 10.1          | 0.99 (0.95, 1.05) | 10.6          | 12.1          | 0.88 (0.83, 0.92) | 13.5                                 | 11.6          | 1.16 (1.01, 1.34) |
| <b>Well-child visits (without immunizations)</b> |               |               |                   |               |               |                   |                                      |               |                   |
| Overall                                          | 0.5           | 1.9           | 0.28 (0.26, 0.30) | 0.6           | 1.3           | 0.42 (0.36, 0.50) | 0.5                                  | 1.8           | 0.26 (0.25, 0.27) |
| March                                            | 0.7           | 2.3           | 0.32 (0.29, 0.35) | 0.5           | 1.8           | 0.30 (0.25, 0.35) | 0.7                                  | 1.9           | 0.36 (0.35, 0.38) |
| April                                            | 0.1           | 1.7           | 0.03 (0.03, 0.04) | 0.1           | 1.3           | 0.04 (0.03, 0.05) | 0.1                                  | 1.6           | 0.04 (0.04, 0.04) |
| May                                              | 0.1           | 1.5           | 0.08 (0.08, 0.08) | 0.1           | 1.3           | 0.10 (0.09, 0.11) | 0.1                                  | 1.5           | 0.08 (0.08, 0.08) |
| June                                             | 0.3           | 1.7           | 0.19 (0.18, 0.21) | 0.3           | 1.2           | 0.24 (0.22, 0.27) | 0.3                                  | 1.7           | 0.17 (0.16, 0.18) |
| July                                             | 0.6           | 2.4           | 0.26 (0.25, 0.28) | 0.6           | 1.5           | 0.42 (0.36, 0.50) | 0.5                                  | 2.1           | 0.22 (0.21, 0.24) |
| August                                           | 0.9           | 2.9           | 0.30 (0.27, 0.34) | 1.2           | 1.9           | 0.60 (0.51, 0.70) | 0.9                                  | 2.9           | 0.30 (0.28, 0.32) |
| September                                        | 0.8           | 1.8           | 0.44 (0.42, 0.46) | 0.8           | 1.2           | 0.64 (0.58, 0.70) | 0.7                                  | 1.9           | 0.35 (0.34, 0.35) |
| October                                          | 0.5           | 1.5           | 0.34 (0.33, 0.36) | 0.6           | 1.0           | 0.61 (0.50, 0.74) | 0.5                                  | 1.7           | 0.29 (0.28, 0.30) |

|    |                    |            |            |                          |      |      |                   |      |      |                   |
|----|--------------------|------------|------------|--------------------------|------|------|-------------------|------|------|-------------------|
|    | November           | 0.6        | 1.5        | 0.36 (0.35, 0.38)        | 0.8  | 1.1  | 0.73 (0.57, 0.95) | 0.5  | 1.7  | 0.30 (0.29, 0.32) |
| 1  | <b>Sick visits</b> | <b>0.5</b> | <b>1.9</b> | <b>0.28 (0.26, 0.30)</b> |      |      |                   |      |      |                   |
| 2  | Overall            | 25.9       | 30.5       | 0.85 (0.80, 0.90)        | 29.1 | 36.3 | 0.80 (0.74, 0.87) | 27.2 | 33.1 | 0.82 (0.79, 0.86) |
| 3  | March              | 26.6       | 34.2       | 0.78 (0.76, 0.80)        | 33.8 | 40.7 | 0.83 (0.78, 0.88) | 28.2 | 35.4 | 0.80 (0.78, 0.81) |
| 4  | April              | 18.3       | 34.1       | 0.54 (0.52, 0.55)        | 20.4 | 40.8 | 0.50 (0.47, 0.53) | 21.4 | 35.8 | 0.60 (0.59, 0.61) |
| 5  | May                | 21.5       | 33.8       | 0.64 (0.60, 0.67)        | 22.8 | 38.9 | 0.59 (0.53, 0.64) | 23.6 | 35.0 | 0.67 (0.65, 0.70) |
| 6  | June               | 25.2       | 31.3       | 0.81 (0.76, 0.86)        | 27.3 | 35.4 | 0.77 (0.71, 0.84) | 24.8 | 32.8 | 0.76 (0.73, 0.79) |
| 7  | July               | 27.7       | 29.1       | 0.95 (0.88, 1.03)        | 30.0 | 33.9 | 0.88 (0.81, 0.96) | 27.4 | 30.4 | 0.90 (0.86, 0.95) |
| 8  | August             | 29.1       | 29.4       | 0.99 (0.90, 1.09)        | 31.0 | 33.5 | 0.93 (0.83, 1.03) | 28.0 | 30.1 | 0.93 (0.87, 0.99) |
| 9  | September          | 28.9       | 28.9       | 1.00 (0.93, 1.08)        | 35.0 | 35.5 | 0.99 (0.90, 1.08) | 32.5 | 31.6 | 1.03 (0.98, 1.09) |
| 10 | October            | 27.9       | 28.1       | 0.99 (0.94, 1.05)        | 32.1 | 35.1 | 0.91 (0.85, 0.98) | 30.2 | 32.5 | 0.93 (0.89, 0.97) |
| 11 | November           | 27.5       | 29.3       | 0.94 (0.91, 0.96)        | 30.0 | 36.5 | 0.82 (0.79, 0.85) | 29.4 | 35.4 | 0.83 (0.81, 0.86) |

12  
13  
14  
15  
16  
17  
18  
19  
20  
21  
22  
23  
24  
25  
26  
27  
28  
29  
30  
31  
32  
33  
34  
35  
36  
37  
38  
39  
40  
41  
42  
43  
44  
45  
46  
47

Confidential

**eTable 10. MANITOBA: Observed, expected, and adjusted relative change (RR, 95% CI) in primary care, well-child, and sick visits in Ontario, during post-pandemic months, by immigrant status.** All rates are weekly visit rates per 1000 population and do not include children <3 years.

|                                                  | Observed rate | Expected rate | RR (95% CI)       | Observed rate | Expected rate | RR (95% CI)       | Observed rate                        | Expected rate | RR (95% CI)       |
|--------------------------------------------------|---------------|---------------|-------------------|---------------|---------------|-------------------|--------------------------------------|---------------|-------------------|
|                                                  | Immigrants    |               |                   | Refugees      |               |                   | Canadian-born or long-term residents |               |                   |
| <b>All primary care visits</b>                   |               |               |                   |               |               |                   |                                      |               |                   |
| Overall                                          | 29.4          | 33.8          | 0.87 (0.80, 0.95) | 35.3          | 37.7          | 0.94 (0.88, 1.00) | 34.5                                 | 41.6          | 0.83 (0.81, 0.85) |
| March                                            | 29.6          | 37.2          | 0.80 (0.77, 0.83) | 39.2          | 39.6          | 0.99 (0.93, 1.06) | 36.1                                 | 43.7          | 0.83 (0.81, 0.84) |
| April                                            | 16.1          | 34.4          | 0.47 (0.43, 0.50) | 27.1          | 40.3          | 0.67 (0.63, 0.72) | 24.1                                 | 43.0          | 0.56 (0.54, 0.58) |
| May                                              | 21.9          | 34.1          | 0.64 (0.60, 0.69) | 27.1          | 38.6          | 0.70 (0.67, 0.74) | 28.4                                 | 42.1          | 0.68 (0.66, 0.70) |
| June                                             | 26.9          | 30.7          | 0.88 (0.83, 0.93) | 34.6          | 33.7          | 1.03 (0.98, 1.08) | 30.3                                 | 39.1          | 0.77 (0.75, 0.80) |
| July                                             | 33.5          | 32.3          | 1.04 (0.91, 1.18) | 36.5          | 35.2          | 1.04 (1.00, 1.08) | 34.1                                 | 35.3          | 0.97 (0.95, 0.99) |
| August                                           | 33.1          | 33.6          | 0.99 (0.87, 1.13) | 37.0          | 36.5          | 1.01 (0.95, 1.08) | 35.9                                 | 37.6          | 0.96 (0.93, 0.99) |
| September                                        | 29.8          | 31.5          | 0.95 (0.85, 1.05) | 31.2          | 36.6          | 0.85 (0.79, 0.92) | 36.4                                 | 41.5          | 0.88 (0.84, 0.91) |
| October                                          | 36.7          | 34.7          | 1.06 (1.00, 1.12) | 43.5          | 39.9          | 1.09 (1.02, 1.16) | 41.9                                 | 44.7          | 0.94 (0.91, 0.96) |
| November                                         | 37.7          | 36.8          | 1.02 (1.00, 1.05) | 42.5          | 40.5          | 1.05 (0.97, 1.13) | 44.1                                 | 48.1          | 0.92 (0.89, 0.94) |
| <b>Well-child visits</b>                         |               |               |                   |               |               |                   |                                      |               |                   |
| Overall                                          | 6.8           | 6.3           | 1.08 (1.00, 1.17) | 5.6           | 5.0           | 1.10 (0.95, 1.28) | 6.6                                  | 6.9           | 0.95 (0.92, 0.99) |
| March                                            | 3.3           | 5.4           | 0.61 (0.57, 0.66) | 3.3           | 4.3           | 0.76 (0.64, 0.89) | 3.2                                  | 5.8           | 0.56 (0.54, 0.58) |
| April                                            | 0.8           | 4.9           | 0.17 (0.17, 0.18) | 2.3           | 4.5           | 0.52 (0.45, 0.61) | 1.8                                  | 5.5           | 0.33 (0.32, 0.34) |
| May                                              | 2.9           | 4.7           | 0.61 (0.60, 0.63) | 2.9           | 3.6           | 0.80 (0.67, 0.96) | 3.4                                  | 5.6           | 0.62 (0.60, 0.64) |
| June                                             | 4.6           | 4.9           | 0.94 (0.89, 0.99) | 4.1           | 3.7           | 1.11 (0.88, 1.40) | 4.3                                  | 5.4           | 0.80 (0.77, 0.83) |
| July                                             | 5.9           | 5.9           | 0.99 (0.87, 1.13) | 4.4           | 3.6           | 1.24 (1.12, 1.37) | 5.2                                  | 5.7           | 0.92 (0.87, 0.96) |
| August                                           | 6.2           | 6.8           | 0.92 (0.81, 1.03) | 5.8           | 4.5           | 1.29 (1.15, 1.45) | 6.4                                  | 7.5           | 0.85 (0.82, 0.88) |
| September                                        | 5.2           | 5.1           | 1.01 (0.94, 1.09) | 3.0           | 3.8           | 0.81 (0.72, 0.91) | 5.3                                  | 6.4           | 0.84 (0.81, 0.86) |
| October                                          | 15.4          | 9.1           | 1.69 (1.58, 1.80) | 10.8          | 8.9           | 1.21 (1.11, 1.31) | 13.5                                 | 10.0          | 1.35 (1.29, 1.40) |
| November                                         | 18.8          | 10.3          | 1.82 (1.70, 1.95) | 14.6          | 9.4           | 1.56 (1.31, 1.84) | 17.7                                 | 11.1          | 1.59 (1.49, 1.69) |
| <b>Well-child visits (with immunizations)</b>    |               |               |                   |               |               |                   |                                      |               |                   |
| Overall                                          | 4.2           | 3.0           | 1.40 (1.22, 1.59) | 3.2           | 2.7           | 1.17 (0.88, 1.56) | 3.9                                  | 3.4           | 1.16 (0.96, 1.40) |
| March                                            | 1.3           | 1.9           | 0.68 (0.62, 0.75) | 0.8           | 1.9           | 0.41 (0.30, 0.57) | 1.1                                  | 1.8           | 0.59 (0.54, 0.64) |
| April                                            | 0.3           | 1.7           | 0.18 (0.16, 0.21) | 0.9           | 1.6           | 0.54 (0.39, 0.74) | 0.4                                  | 1.8           | 0.24 (0.20, 0.29) |
| May                                              | 0.9           | 1.5           | 0.57 (0.48, 0.67) | 0.9           | 1.4           | 0.67 (0.55, 0.81) | 1.0                                  | 1.7           | 0.59 (0.50, 0.70) |
| June                                             | 1.4           | 1.7           | 0.81 (0.67, 0.97) | 1.1           | 0.9           | 1.29 (1.00, 1.67) | 1.4                                  | 1.7           | 0.80 (0.64, 1.00) |
| July                                             | 2.0           | 1.8           | 1.14 (1.06, 1.23) | 1.0           | 1.2           | 0.79 (0.57, 1.10) | 1.8                                  | 1.8           | 1.01 (0.84, 1.20) |
| August                                           | 2.0           | 2.0           | 1.00 (0.91, 1.10) | 1.2           | 1.4           | 0.87 (0.56, 1.35) | 2.2                                  | 2.3           | 0.98 (0.74, 1.28) |
| September                                        | 2.2           | 1.9           | 1.19 (1.12, 1.25) | 1.6           | 1.6           | 0.99 (0.76, 1.28) | 2.4                                  | 2.3           | 1.01 (0.92, 1.11) |
| October                                          | 13.1          | 6.7           | 1.94 (1.68, 2.25) | 9.7           | 7.0           | 1.39 (1.19, 1.62) | 11.4                                 | 7.7           | 1.48 (1.24, 1.77) |
| November                                         | 17.1          | 7.8           | 2.19 (1.87, 2.57) | 12.9          | 7.7           | 1.67 (1.44, 1.94) | 15.6                                 | 9.0           | 1.73 (1.42, 2.11) |
| <b>Well-child visits (without immunizations)</b> |               |               |                   |               |               |                   |                                      |               |                   |
| Overall                                          | 2.6           | 3.2           | 0.79 (0.72, 0.87) | 2.4           | 2.3           | 1.03 (0.86, 1.24) | 2.7                                  | 3.6           | 0.75 (0.72, 0.77) |
| March                                            | 2.1           | 3.5           | 0.58 (0.53, 0.64) | 2.5           | 2.4           | 1.03 (0.88, 1.21) | 2.2                                  | 3.7           | 0.58 (0.57, 0.59) |
| April                                            | 0.5           | 3.1           | 0.17 (0.16, 0.18) | 1.5           | 2.8           | 0.52 (0.44, 0.60) | 1.4                                  | 3.5           | 0.39 (0.38, 0.41) |
| May                                              | 2.0           | 3.1           | 0.64 (0.60, 0.69) | 2.0           | 2.2           | 0.90 (0.71, 1.14) | 2.4                                  | 3.6           | 0.68 (0.65, 0.71) |
| June                                             | 3.2           | 3.2           | 1.01 (0.96, 1.06) | 3.0           | 2.7           | 1.08 (0.82, 1.42) | 3.0                                  | 3.5           | 0.86 (0.84, 0.89) |
| July                                             | 3.8           | 4.1           | 0.93 (0.81, 1.07) | 3.5           | 2.3           | 1.48 (1.32, 1.67) | 3.5                                  | 3.7           | 0.94 (0.90, 0.98) |
| August                                           | 4.2           | 4.7           | 0.90 (0.79, 1.02) | 4.6           | 3.0           | 1.50 (1.34, 1.69) | 4.1                                  | 4.8           | 0.85 (0.81, 0.90) |
| September                                        | 3.0           | 3.3           | 0.91 (0.84, 0.99) | 1.5           | 2.2           | 0.68 (0.60, 0.78) | 3.0                                  | 3.9           | 0.76 (0.73, 0.79) |
| October                                          | 2.3           | 2.4           | 0.94 (0.85, 1.04) | 1.0           | 2.0           | 0.51 (0.46, 0.58) | 2.0                                  | 3.2           | 0.64 (0.63, 0.65) |

|    |                    |      |      |                   |      |      |                   |      |      |                   |
|----|--------------------|------|------|-------------------|------|------|-------------------|------|------|-------------------|
| 1  | November           | 1.7  | 2.4  | 0.69 (0.66, 0.72) | 1.6  | 1.8  | 0.93 (0.71, 1.22) | 2.1  | 3.1  | 0.68 (0.66, 0.70) |
| 2  | <b>Sick visits</b> |      |      |                   |      |      |                   |      |      |                   |
| 3  | Overall            | 22.6 | 27.5 | 0.82 (0.75, 0.90) | 29.8 | 32.7 | 0.91 (0.86, 0.97) | 27.9 | 34.8 | 0.80 (0.78, 0.83) |
| 4  | March              | 26.3 | 32.0 | 0.82 (0.80, 0.84) | 36.0 | 35.6 | 1.01 (0.95, 1.07) | 32.9 | 37.8 | 0.87 (0.86, 0.88) |
| 5  | April              | 15.2 | 29.7 | 0.51 (0.48, 0.55) | 24.7 | 36.2 | 0.68 (0.64, 0.73) | 22.3 | 37.4 | 0.60 (0.58, 0.62) |
| 6  | May                | 19.1 | 29.6 | 0.65 (0.60, 0.69) | 24.2 | 35.6 | 0.68 (0.64, 0.73) | 25.0 | 36.5 | 0.69 (0.66, 0.71) |
| 7  | June               | 22.3 | 25.8 | 0.86 (0.82, 0.91) | 30.5 | 30.3 | 1.01 (0.98, 1.04) | 25.9 | 33.6 | 0.77 (0.75, 0.80) |
| 8  | July               | 27.6 | 26.3 | 1.05 (0.92, 1.19) | 32.1 | 32.0 | 1.00 (0.97, 1.03) | 28.9 | 29.6 | 0.98 (0.96, 0.99) |
| 9  | August             | 26.9 | 26.6 | 1.01 (0.88, 1.16) | 31.2 | 32.3 | 0.97 (0.90, 1.04) | 29.6 | 30.2 | 0.98 (0.93, 1.03) |
| 10 | September          | 24.6 | 26.4 | 0.93 (0.84, 1.04) | 28.1 | 33.2 | 0.85 (0.78, 0.91) | 31.1 | 35.1 | 0.89 (0.84, 0.93) |
| 11 | October            | 21.3 | 25.0 | 0.85 (0.78, 0.93) | 32.7 | 29.8 | 1.10 (1.01, 1.20) | 28.4 | 34.9 | 0.81 (0.78, 0.85) |
| 12 | November           | 18.9 | 26.0 | 0.73 (0.69, 0.76) | 27.9 | 29.9 | 0.94 (0.89, 0.99) | 26.4 | 37.3 | 0.71 (0.69, 0.72) |

Confidential

11  
12  
13  
14  
15  
16  
17  
18  
19  
20  
21  
22  
23  
24  
25  
26  
27  
28  
29  
30  
31  
32  
33  
34  
35  
36  
37  
38  
39  
40  
41  
42  
43  
44  
45  
46  
47

**eTable 11. Virtual primary care visits among children and adolescents, in post-pandemic months, by equity lens** All values are the percent of observed visits in 2020 that were virtual and do not include newborns.

|           | Ontario              |                   |                  |                   |                    | Manitoba            |                   |                  |                   |                    |
|-----------|----------------------|-------------------|------------------|-------------------|--------------------|---------------------|-------------------|------------------|-------------------|--------------------|
|           | Age group            |                   |                  |                   |                    |                     |                   |                  |                   |                    |
|           | Newborns             | Age 29 - 365 days | Age 1 to 5 years | Age 6 to 12 years | Age 13 to 17 years | Newborns            | Age 29 - 365 days | Age 1 to 5 years | Age 6 to 12 years | Age 13 to 17 years |
| Overall   | 18.9                 | 35.7              | 44.7             | 58.3              | 64.0               | 15.4                | 25.0              | 22.5             | 31.6              | 33.2               |
| March     | 25.6                 | 26.2              | 29.9             | 33.4              | 37.8               | 26.8                | 26.4              | 32.4             | 30.5              | 32.5               |
| April     | 25.7                 | 51.3              | 67.5             | 88.0              | 89.2               | 21.5                | 40.1              | 46.5             | 58.0              | 55.5               |
| May       | 20.8                 | 46.2              | 60.5             | 82.2              | 84.0               | 15.9                | 30.1              | 29.4             | 45.4              | 44.3               |
| June      | 17.8                 | 40.2              | 54.1             | 71.9              | 74.9               | 11.0                | 24.0              | 27.1             | 30.7              | 31.8               |
| July      | 15.5                 | 35.5              | 48.5             | 64.1              | 68.2               | 12.8                | 19.7              | 23.2             | 25.3              | 26.5               |
| August    | 15.0                 | 31.7              | 43.5             | 58.1              | 62.0               | 12.0                | 20.4              | 26.9             | 27.8              | 27.7               |
| September | 15.3                 | 31.2              | 48.7             | 62.3              | 64.6               | 12.6                | 20.1              | 25.8             | 30.8              | 29.0               |
| October   | 15.8                 | 30.2              | 35.8             | 49.8              | 57.7               | 13.7                | 20.8              | 23.7             | 24.7              | 28.2               |
| November  |                      | 29.6              | 32.3             | 44.2              | 55.0               | 17.0                | 23.5              | 20.1             | 24.8              | 32.1               |
|           | Material deprivation |                   |                  |                   |                    |                     |                   |                  |                   |                    |
|           | Q1 (least deprived)  | Q2                | Q3               | Q4                | Q5 (most deprived) | Q1 (least deprived) | Q2                | Q3               | Q4                | Q5 (most deprived) |
| Overall   | 54.6                 | 53.6              | 53.1             | 51.4              | 50.1               | 27.9                | 29.3              | 30.0             | 30.3              | 32.0               |
| March     | 34.5                 | 33.3              | 32.8             | 31.2              | 30.0               | 24.0                | 32.0              | 29.5             | 28.3              | 25.6               |
| April     | 77.6                 | 76.4              | 76.0             | 73.4              | 73.1               | 57.0                | 54.0              | 52.6             | 51.9              | 49.0               |
| May       | 72.6                 | 71.4              | 70.0             | 67.8              | 66.5               | 41.6                | 42.0              | 39.6             | 40.3              | 40.2               |
| June      | 65.5                 | 63.8              | 62.8             | 60.4              | 58.4               | 28.6                | 28.6              | 28.9             | 29.4              | 30.0               |
| July      | 59.4                 | 57.8              | 57.1             | 54.6              | 52.0               | 23.6                | 24.2              | 24.3             | 24.5              | 26.1               |
| August    | 54.5                 | 52.9              | 51.8             | 49.4              | 47.5               | 23.9                | 24.8              | 26.1             | 26.8              | 28.9               |
| September | 58.4                 | 56.2              | 54.8             | 52.5              | 50.3               | 26.8                | 26.9              | 28.2             | 27.6              | 29.7               |
| October   | 45.6                 | 45.9              | 46.6             | 45.8              | 45.0               | 20.2                | 21.7              | 25.0             | 25.4              | 29.8               |
| November  | 41.5                 | 41.8              | 42.9             | 42.7              | 42.9               | 20.5                | 21.8              | 25.0             | 26.6              | 34.0               |
|           | Immigrant status     |                   |                  |                   |                    |                     |                   |                  |                   |                    |
|           | Immigrants           | Refugees          | Canadian born    | Immigrants        | Refugees           | Canadian born       | Immigrants        | Refugees         | Canadian born     |                    |
| Overall   | 61.2                 | 49.5              | 60.3             | 24.9              | 23.3               | 23.4                | 24.9              | 23.3             | 23.4              |                    |
| March     | 32.1                 | 25.5              | 35.7             | 24.9              | 23.3               | 57.5                | 24.9              | 23.3             | 57.5              |                    |
| April     | 88.7                 | 79.7              | 88.4             | 57.6              | 42.6               | 45.2                | 57.6              | 42.6             | 45.2              |                    |
| May       | 82.5                 | 72.4              | 82.8             | 41.6              | 27.6               | 31.5                | 41.6              | 27.6             | 31.5              |                    |
| June      | 73.3                 | 60.7              | 73.2             | 28.6              | 17.3               | 26.5                | 28.6              | 17.3             | 26.5              |                    |
| July      | 66.9                 | 54.6              | 65.8             | 22.5              | 16.6               | 28.1                | 22.5              | 16.6             | 28.1              |                    |
| August    | 61.2                 | 48.8              | 59.3             | 23.9              | 14.8               | 30.3                | 23.9              | 14.8             | 30.3              |                    |
| September | 63.9                 | 50.0              | 63.2             | 26.9              | 21.7               | 26.0                | 26.9              | 21.7             | 26.0              |                    |
| October   | 53.6                 | 41.6              | 51.8             | 20.7              | 21.8               | 27.0                | 20.7              | 21.8             | 27.0              |                    |
| November  | 52.6                 | 41.7              | 47.4             | 21.9              | 21.6               | 31.5                | 21.9              | 21.6             | 31.5              |                    |
|           | Rurality             |                   |                  |                   |                    |                     |                   |                  |                   |                    |
|           | Urban                | Rural             | Urban            | Rural             | Urban              | Rural               | Urban             | Rural            |                   |                    |
| Overall   | 53.0                 | 49.7              | 28.0             | 34.9              | 53.0               | 49.7                | 28.0              | 34.9             |                   |                    |
| March     | 32.4                 | 34.9              | 21.6             | 31.2              | 32.4               | 34.9                | 21.6              | 31.2             |                   |                    |
| April     | 75.7                 | 73.1              | 52.7             | 53.1              | 75.7               | 73.1                | 52.7              | 53.1             |                   |                    |
| May       | 70.2                 | 66.4              | 40.2             | 42.8              | 70.2               | 66.4                | 40.2              | 42.8             |                   |                    |
| June      | 62.8                 | 57.8              | 28.0             | 33.0              | 62.8               | 57.8                | 28.0              | 33.0             |                   |                    |
| July      | 56.8                 | 51.6              | 23.4             | 29.0              | 56.8               | 51.6                | 23.4              | 29.0             |                   |                    |
| August    | 51.9                 | 46.1              | 24.5             | 32.1              | 51.9               | 46.1                | 24.5              | 32.1             |                   |                    |
| September | 55.1                 | 49.6              | 26.6             | 32.5              | 55.1               | 49.6                | 26.6              | 32.5             |                   |                    |
| October   | 45.9                 | 43.4              | 22.5             | 31.8              | 45.9               | 43.4                | 22.5              | 31.8             |                   |                    |
| November  | 42.5                 | 37.2              | 23.1             | 34.6              | 42.5               | 37.2                | 23.1              | 34.6             |                   |                    |

**eTable 12.** Appendix A. List of primary care fee codes from Ontario and Manitoba.

## ONTARIO

| Fee code (OHIP) | Description                                                                                                           |
|-----------------|-----------------------------------------------------------------------------------------------------------------------|
| A001            | MINOR ASSESS.-F.P./G.P.                                                                                               |
| A002            | 18 MONTH WELL BABY CHECK -GP/FP                                                                                       |
| A003            | GEN. ASSESS. -F.P./G.P.                                                                                               |
| A004            | GEN.RE-ASSESS-F.P./G.P.                                                                                               |
| A007            | INTERMED.ASSESS/WELL BABY CARE-F.P./G.P./PAED.                                                                        |
| A261            | MINOR ASSESS.-PAED.                                                                                                   |
| A263            | MEDICAL SPECIFIC ASSESSMENT-PAED                                                                                      |
| A264            | MEDICAL SPECIFIC RE-ASSESSMENT-PAED                                                                                   |
| A268            | 18 MONTH WELL BABY CHECK - PAEDS                                                                                      |
| A661            | COMPLEX MEDICAL SPECIFIC RE-ASSESSMENT                                                                                |
| A901            | GENERAL/FAMILY PRACTICE-HOUSECALL ASSESSMENT                                                                          |
| A903            | GEN/FAM PRACT-PRE-DENTAL/OPER.ASSESS LIMIT 2 PER YEAR/PT                                                              |
| A990            | SPEC VIS PHYS OFFICE - WK/DAYTIME                                                                                     |
| A994            | SPEC VIS PHYS OFFICE - MON-FRI., EVE                                                                                  |
| A996            | SPEC VIS PHYS OFFICE - NIGHTS                                                                                         |
| B910            | SPEC.VISIT,7.00AM-12.00M.NMON-FRI.1ST PT SEEN OFF/HOSP/EMERG                                                          |
| B914            | SPEC.VISIT,7.00AM-12.00MN,SAT,SUN&HOL.1ST PT EXC.OFF/EMERG/H                                                          |
| B990            | SPEC VIS TO PT'S HOME, WK/DAYTIME                                                                                     |
| B992            | SPEC VIS-PT'S HOME/NON-ELECT -SAC OFF HRS. WK/DAYTIME                                                                 |
| B994            | SPEC VIS TO PT'S HOME/NON-ELECT., EVE                                                                                 |
| B996            | SPECIAL VISIT-HOME-NIGHTS(12MN-7AM) 1ST PT.                                                                           |
| G212            | D./T. PROC.-ALLERGY-HYPOSENSITIZATION INJECTION PLUS BASIC                                                            |
| G271            | D./T. PROC.-CARDIOV.-ANTICOAGULANT SUPERVISION                                                                        |
| G365            | D./T. PROC.-GYNAECOLOGY-PAPANICOLAOU SMEAR                                                                            |
| G372            | D./T. PROC.-INJECTIONS-INTRADERMAL/MUSCULAR ETC. EA. ADD.                                                             |
| G373            | D./T. PROC.-INJ. INTRADERMAL/MUSC. BASIC FEE (SHICK TEST)                                                             |
| G538            | D&T IMMUNIZATION-WITH VISIT, EACH INJECT.                                                                             |
| G539            | D&T IMMUNIZATION-SOLE REASON,FIRST INJECTION                                                                          |
| G590            | INFLUENZA AGENT +VISIT                                                                                                |
| G591            | INFLUENZA AGENT SOLE REASON                                                                                           |
| G840            | DTaPIPV-Diphtheria, Tetanus, acellular Pertussis, Inactivated Polio Virus paediatric                                  |
| G841            | DTaPIPVHib-Diphtheria, Tetanus, acellular Pertussis, Inactivated Polio Virus, Haemophilus influenza type b paediatric |
| G844            | MenCC-Meningococcal C Conjugate                                                                                       |
| G845            | MMR-Measles, Mumps, Rubella                                                                                           |
| G846            | Pneu - Pneumococcal Conjugate                                                                                         |
| G848            | Var-Varicella                                                                                                         |
| K002            | INTERVIEWS-RELATIVES ON BEHALF OF PATIENT PER 1/2 HOUR                                                                |
| K003            | INTERVIEW ON BEHALF OF PATIENT (CAS,LEG.GUARD) PER 1/2HR.                                                             |
| K005            | INDIVIDUAL CARE PER 1/2 HR                                                                                            |
| K007            | IND. PSYCHOTHERAPY PER HALF HOUR - GP                                                                                 |
| K008            | DIAG.INTERVIEW W/CHILD &/OR PARENT-PER 1/2HR.                                                                         |
| K013            | COUNSELLING-ONE OR MORE PEOPLE-PER 1/2HR.                                                                             |
| K014            | COUNSELLING-FOR DONOR/RECIP/RECIP FAMILIES RE;ORGAN TRANSPLA                                                          |
| K016            | GENETIC ASSESSMENT PATIENT OR FAMILY, DIRECT CONTACT, PER                                                             |
| K017            | ANNUAL HEALTH EXAM-CHILD AFT. 2ND BIRTHDAY.                                                                           |
| K022            | HIV PRIM CARE INDIVID CARE 1/2 HR OR MAJOR PART                                                                       |
| K033            | COUNSELLING - 1 PT/YR/UNIT                                                                                            |
| K040            | GROUP COUNSEL - 2 +PTS WITH NO K013/K040X3                                                                            |
| K130            | PERIODIC HEALTH VISIT-ADOLESCENT (AGE 16 & 17)                                                                        |
| K267            | ANNUAL HEALTH EXAM-CHILD-AFT. 2ND BIRTHDAY PAED.                                                                      |
| K269            | ANNUAL HEALTH EXAM-PAEDIATRICS-ADOLESCENT-OFFICE                                                                      |
| P004            | OBS.-PRENATAL CARE-MINOR PRENATAL ASSESS.-SUBSEQ.PRENAT.VIS.                                                          |
| Q990            | SPEC VIS - OTHER SETTINGS - WK/DAYTIME                                                                                |

|      |                                                              |
|------|--------------------------------------------------------------|
| Q992 | SPEC VIS - OTHER SETTINGS-SAC.OFF.HRS.WK/DAYTIME, ADDIT'L PT |
| Q994 | SPEC VIS - OTHER SETTINGS, MON-FRI., EVE                     |
| Q996 | SPEC VIS - OTHER SETTING – NIGHTS                            |

Primary care ambulatory visits for Manitoba

This method includes a number of "data conditions" that will either include or exclude specific types of services.

1. Include only those records with the tariff prefix, PREFIX = "7". These are defined as "Visits, Calls and Special Tests" in the Medical Services data.
2. Exclude a visit if it happens during an inpatient hospital stay, identified using the hospital abstracts data and ADT data. A visit on the day of admission or discharge, or in between these two dates is excluded.
3. Exclude Emergency Room services using the variable OPD with the following value: "E" - Emergency Room Services.
4. Exclude nonprimary care visits by keeping visits with mdblocs ('02', '11', '111', '112', '114', '115', '116', '200')
  - '02'='02. PAEDIATRICS'
  - '11'='11. GENERAL PRACTICE'
  - '111'='111. GENERAL PRACTICE - URBAN'
  - '112'='112. GENERAL PRACTICE - RURAL'
  - '114'='114. COMMUNITY MEDICINE (PUBLIC HEALTH)'
  - '115'='115. FAMILY PRACTICE - URBAN'
  - '116'='116. FAMILY PRACTICE - RURAL'
  - '200'='200. PRIMARY CARE NURSE'
